# Supplementary material for: Oak Root Response to Ectomycorrhizal Symbiosis Establishment: RNA-Seq Derived Transcript Identification and Expression Profiling
Source: PLoS One. 2014 May 23;9(5):e98376. doi: 10.1371/journal.pone.0098376 (PMC4032270; doi:10.1371/journal.pone.0098376)
Supplement: Table S2 — Up- and down-regulated genes in ECM roots when compared to non-symbiotic roots. (XLSX) [file pone.0098376.s008.xlsx]

## Sheet: Up regulated
List of transcripts differentially expressed in ECM roots versus non symbiotic roots (absolute log2 FC ≥ 2; FDR < 0.001)
Sequence ID	BLAST2Go annotation	Length	Min. E value	Mean simil.	GO terms	Enzymes code	# ECM reads	# non-sym reads	log2FC normalized	log2CPM	LR	PValue	adjusted P value
qs_c10373	asparaginyl-trna synthetase	446	3.11908e-31	0.9505	C:cytosol; F:catalytic activity; P:nucleobase-containing compound metabolic process; P:translation; ; F:nucleic acid binding; C:mitochondrion; F:nucleotide binding; C:plastid; P:biological_process; P:reproduction; P:post-embryonic development; P:embryo development	EC:6.1.1.22	7	0	9.02514	6.62258	74.0019	7.80422e-18	8.11639e-16
qs_c10016	cytochrome p450	481	1.13887e-18	0.841	F:binding; C:endoplasmic reticulum; F:molecular_function; F:catalytic activity; P:metabolic process; F:oxygen binding	EC:1.14.14.1	6	0	8.90989	6.51406	69.2059	8.87015e-17	7.91914e-15
qs_c10210	gag-pol polyprotein	497	1.938e-35	0.6465	F:binding; P:metabolic process	-	7	0	8.83605	6.4448	66.271	3.92995e-16	3.312e-14
qs_c11212	rna polymerase core protein	542	4.0476e-45	0.754	F:transferase activity; ; F:DNA binding; F:catalytic activity; F:nucleotide binding; C:intracellular; P:DNA metabolic process	EC:2.7.7.6; EC:5.99.1.3	7	0	8.83605	6.4448	66.271	3.92995e-16	3.312e-14
qs_c10020	ion channel dmi1- chloroplast expressed	379	4.9427e-31	0.9655	C:membrane; C:nuclear envelope; P:transport; C:plastid; F:transporter activity; F:nucleotide binding	-	6	0	8.73132	6.34695	62.2882	2.96702e-15	2.26606e-13
qs_c10235	---NA---	262			-		6	0	8.73132	6.34695	62.2882	2.96702e-15	2.26606e-13
qs_c10607	PREDICTED: uncharacterized protein LOC101231355, partial	438	2.85918e-36	0.864	C:plastid	-	6	0	8.73132	6.34695	62.2882	2.96702e-15	2.26606e-13
qs_c5936	flavonol sulfotransferase-like	1414	2.11283e-159	0.8035	P:biosynthetic process; P:cellular process; P:lipid metabolic process; P:response to external stimulus; P:response to stress; P:signal transduction; P:response to endogenous stimulus; F:transferase activity	EC:2.8.2.2	64	0	8.64746	6.26895	59.247	1.39075e-14	9.54103e-13
qs_c11275	pentatricopeptide repeat-containing protein	609	6.17195e-93	0.786	P:transport; P:cellular process; C:membrane; F:transporter activity	-	9	0	8.52748	6.15791	55.1171	1.1356e-13	6.81083e-12
qs_c10110	pentatricopeptide repeat-containing protein at1g71490-like	644	1.18836e-64	0.794	F:molecular_function; P:biological_process; C:cellular_component		8	0	8.32643	5.97349	48.7539	2.90182e-12	1.37044e-10
qs_c10825	brassinosteroid insensitive 1-associated receptor kinase 1	654	1.24099e-108	0.8675	F:receptor activity; P:transport; C:plasma membrane; F:kinase activity; P:cellular protein modification process; F:nucleotide binding	EC:2.7.10.0; EC:2.7.11.0	8	0	8.32643	5.97349	48.7539	2.90182e-12	1.37044e-10
qs_c10119	protein	500	2.30034e-28	0.7085	F:transferase activity	-	5	0	8.09276	5.76199	42.1763	8.34044e-11	3.07684e-09
qs_c10364	poly polymerase-like	505	9.24603e-68	0.7315	P:nucleobase-containing compound metabolic process; F:transferase activity	EC:2.7.7.0	4	0	7.76155	5.46825	34.2109	4.94517e-09	1.28575e-07
qs_c11239	kinetochore protein ndc80 homolog	507	5.59212e-72	0.8335	P:cell cycle; P:flower development; P:anatomical structure morphogenesis; P:biosynthetic process; P:DNA metabolic process; P:cellular component organization; P:cellular protein modification process; P:cellular process; P:regulation of gene expression, epigenetic	-	4	0	7.76155	5.46825	34.2109	4.94517e-09	1.28575e-07
qs_c11393	g-type lectin s-receptor-like serine threonine-protein kinase b120-like	992	8.22762e-170	0.8365	F:carbohydrate binding; P:response to external stimulus; P:response to stress; P:cellular protein modification process; P:signal transduction; P:cellular component organization; P:cellular process; P:cell death; P:metabolic process; P:biological_process; P:transport; P:response to biotic stimulus; P:pollen-pistil interaction; C:intracellular; F:kinase activity; F:signal transducer activity; F:rec…	EC:2.7.11.25	21	0	7.76155	5.46825	34.2109	4.94517e-09	1.28575e-07
qs_c11301	rhomboid family protein	456	2.02348e-27	0.8725	P:cellular process; P:lipid metabolic process; F:hydrolase activity; C:membrane; P:protein metabolic process; P:catabolic process; C:plastid	EC:3.4.21.0	26	0	7.62377	9.24538	252.095	9.07131e-57	1.77362e-52
qs_c4359	uncharacterized vacuolar membrane protein yml018c-like	1347	1.41377e-137	0.7205	C:membrane; F:molecular_function; P:biological_process		29	0	7.53138	5.26895	29.5083	5.56763e-08	1.16801e-06
qs_c110402	pentatricopeptide repeat-containing protein	461	7.42194e-21	0.7915	F:molecular_function; P:biological_process		3	0	7.46761	5.2145	28.3147	1.03109e-07	2.04048e-06
qs_c10031	formation of crista junctions protein 1-like	724	6.22752e-14	0.634	C:membrane; C:mitochondrion	-	7	0	7.33092	5.09902	25.9052	3.58603e-07	6.10218e-06
qs_c10803	protein tesmin tso1-like cxc 2-like	720	1.91724e-73	0.5895	-		7	0	7.33092	5.09902	25.9052	3.58603e-07	6.10218e-06
qs_c112420	hypothetical protein VITISV_018153	481	3.97088e-05	0.6322	-		3	0	7.33092	5.09902	25.9052	3.58603e-07	6.10218e-06
qs_c2509	carbonic anhydrase 2	448	7.42549e-35	0.581	P:cellular process; F:binding; P:response to biotic stimulus; P:metabolic process; F:catalytic activity; C:plastid; P:response to stress	EC:4.2.1.1	20	0	7.28812	8.91494	219.13	1.40026e-49	6.84449e-46
qs_c14730	importin subunit alpha-2-like	478	4.11842e-42	0.745	P:cellular process; C:cytosol; P:cell cycle; P:nucleobase-containing compound metabolic process; P:biological_process; P:transport	-	17	0	7.16106	8.79018	207.25	5.4686e-47	2.13844e-43
qs_c1880	protein	399	2.56317e-35	0.7055	-		26	0	6.99002	8.62258	191.807	1.28224e-43	3.58148e-40
qs_c11255	probable inactive purple acid phosphatase 28-like	848	4.50994e-110	0.8045	C:cytoplasm; F:hydrolase activity	EC:3.1.3.2	6	0	6.82018	4.68398	18.4916	1.70657e-05	0.000183133
qs_c21218	probable atp-dependent rna helicase dhx36-like	476	2.63418e-22	0.989	F:hydrolase activity; F:nucleic acid binding; P:biosynthetic process; P:cellular protein modification process; F:nucleotide binding; C:mitochondrion	-	12	0	6.69472	8.33424	166.686	3.91823e-38	5.10728e-35
qs_c110123	abc transporter c family member 9-like	447	1.82976e-67	0.8485	P:transport; P:cellular process; P:metabolic process; C:membrane; F:hydrolase activity; F:transporter activity; C:plasma membrane; P:nucleobase-containing compound metabolic process; P:catabolic process; F:nucleotide binding; F:catalytic activity; P:response to biotic stimulus	EC:1.3.1.74	2	0	6.59991	4.51406	15.9559	6.48346e-05	0.000582495
qs_c110192	mediator of dna damage checkpoint protein	472	1.29144e-57	0.8055	F:nucleic acid binding; F:transferase activity; P:DNA metabolic process	-	2	0	6.59991	4.51406	15.9559	6.48346e-05	0.000582495
qs_c110194	PREDICTED: uncharacterized protein LOC100265672	183	7.33673e-05	0.86	-		2	0	6.59991	4.51406	15.9559	6.48346e-05	0.000582495
qs_c110202	histone acetyltransferase complex component	484	1.01607e-40	0.7115	P:response to stress; P:response to abiotic stimulus; F:DNA binding; F:transferase activity; C:nucleus; F:binding	-	2	0	6.59991	4.51406	15.9559	6.48346e-05	0.000582495
qs_c110211	unnamed protein product	495	4.32373e-09	0.9295	C:membrane; C:Golgi apparatus; P:cellular component organization; P:carbohydrate metabolic process; P:cellular process; C:plasma membrane; C:plastid; C:thylakoid	-	2	0	6.59991	4.51406	15.9559	6.48346e-05	0.000582495
qs_c110280	f-box identical	475	3.0974e-10	0.7175	F:ligase activity		2	0	6.59991	4.51406	15.9559	6.48346e-05	0.000582495
qs_c110349	thromboxane-a synthase-like	488	8.67526e-50	0.8725	F:binding; F:molecular_function; F:catalytic activity; P:metabolic process	EC:1.14.14.1	2	0	6.59991	4.51406	15.9559	6.48346e-05	0.000582495
qs_c110364	1-aminocyclopropane-1-carboxylate deaminase-like	412	7.50355e-37	0.7845	P:metabolic process; F:binding; F:catalytic activity	-	2	0	6.59991	4.51406	15.9559	6.48346e-05	0.000582495
qs_c110410	protein	405	2.17759e-28	0.896	C:cytoplasm	-	2	0	6.59991	4.51406	15.9559	6.48346e-05	0.000582495
qs_c110595	cytochrome c oxidase biogenesis protein cmc1-like protein	464	4.9065e-26	0.799	F:molecular_function; P:biological_process; C:cellular_component		2	0	6.59991	4.51406	15.9559	6.48346e-05	0.000582495
qs_c110640	-dihydroxy-3-keto-5-methylthiopentene dioxygenase 4	474	1.51865e-82	0.9215	C:cytoplasm; F:binding; P:biosynthetic process; ; F:catalytic activity; C:nucleus; P:metabolic process	EC:1.13.11.54	2	0	6.59991	4.51406	15.9559	6.48346e-05	0.000582495
qs_c110743	nuclease harbi1-like	468	2.18461e-13	0.5675	-		2	0	6.59991	4.51406	15.9559	6.48346e-05	0.000582495
qs_c110778	btb poz domain-containing protein at2g30600-like	483	7.16818e-17	0.823	P:cellular process	-	2	0	6.59991	4.51406	15.9559	6.48346e-05	0.000582495
qs_c110787	pfkb-like carbohydrate kinase family protein	477	3.02858e-35	0.7785	F:kinase activity; P:metabolic process; P:cellular process; P:reproduction; P:post-embryonic development; P:response to abiotic stimulus; F:nucleotide binding; F:catalytic activity	EC:4.2.1.93	2	0	6.59991	4.51406	15.9559	6.48346e-05	0.000582495
qs_c110909	tpa: snrk sapk family protein kinase	476	1.40693e-30	0.773	P:response to stress; P:response to abiotic stimulus; P:cellular protein modification process; F:nucleotide binding; F:kinase activity	EC:2.7.11.0	2	0	6.59991	4.51406	15.9559	6.48346e-05	0.000582495
qs_c110921	transcription factor myc2-like	339	1.19548e-20	0.7575	F:catalytic activity	-	2	0	6.59991	4.51406	15.9559	6.48346e-05	0.000582495
qs_c110931	heat shock protein binding	328	4.14055e-12	0.7029	F:heat shock protein binding; P:response to stress		2	0	6.59991	4.51406	15.9559	6.48346e-05	0.000582495
qs_c110950	protein	207	2.00008e-06	0.855	-		2	0	6.59991	4.51406	15.9559	6.48346e-05	0.000582495
qs_c110953	phd-finger family expressed	476	1.07616e-50	0.855	F:DNA binding; C:cellular_component; F:binding;	-	2	0	6.59991	4.51406	15.9559	6.48346e-05	0.000582495
qs_c111062	dna polymerase theta-like	478	1.72303e-67	0.786	P:DNA metabolic process; F:transferase activity; P:metabolic process; F:hydrolase activity; P:biosynthetic process; P:response to abiotic stimulus; P:post-embryonic development; F:DNA binding; F:nucleotide binding; C:nucleus	EC:2.7.7.7	2	0	6.59991	4.51406	15.9559	6.48346e-05	0.000582495
qs_c111127	cc-nbs-lrr resistance protein	495	2.31685e-40	0.732	F:hydrolase activity; P:response to stress; F:nucleotide binding	EC:3.6.1.15; EC:3.1.3.16	2	0	6.59991	4.51406	15.9559	6.48346e-05	0.000582495
qs_c111135	tetratricopeptide repeat domain-containing protein	477	1.61497e-77	0.846	P:biological_process; C:cellular_component		2	0	6.59991	4.51406	15.9559	6.48346e-05	0.000582495
qs_c111166	amidohydrolase ytcj-like	490	1.0863e-61	0.8245	F:hydrolase activity; C:cytoplasm; P:catabolic process;	EC:3.5.2.0	2	0	6.59991	4.51406	15.9559	6.48346e-05	0.000582495
qs_c111167	pentatricopeptide repeat-containing protein at5g47460-like	479	8.87456e-75	0.758	F:molecular_function; P:biological_process; C:cellular_component		2	0	6.59991	4.51406	15.9559	6.48346e-05	0.000582495
qs_c111193	PREDICTED: uncharacterized protein LOC100243514	409	1.55878e-15	0.5594	-		2	0	6.59991	4.51406	15.9559	6.48346e-05	0.000582495
qs_c111203	pentatricopeptide repeat-containing protein	507	2.70084e-69	0.7335	C:mitochondrion	-	2	0	6.59991	4.51406	15.9559	6.48346e-05	0.000582495
qs_c111265	serine threonine-protein kinase at5g01020-like	441	2.49347e-11	0.965	C:cytoplasm; C:nucleolus; F:receptor activity; F:kinase activity; C:plasma membrane; P:cellular protein modification process; P:response to stress; P:response to biotic stimulus; F:nucleotide binding	EC:2.7.10.2; EC:2.7.11.0	2	0	6.59991	4.51406	15.9559	6.48346e-05	0.000582495
qs_c111266	rna-directed dna polymerase	460	1.12325e-24	0.593	F:binding	-	2	0	6.59991	4.51406	15.9559	6.48346e-05	0.000582495
qs_c111352	alpha galactosidase	469	6.57003e-21	0.7465	F:binding; P:carbohydrate metabolic process; P:anatomical structure morphogenesis; P:multicellular organismal development; P:flower development; P:transport; P:cellular process; C:cell wall; C:cytoplasm	EC:3.2.1.22	2	0	6.59991	4.51406	15.9559	6.48346e-05	0.000582495
qs_c111369	protein binding	511	7.37947e-60	0.8665	C:cellular_component		2	0	6.59991	4.51406	15.9559	6.48346e-05	0.000582495
qs_c111420	conserved hypothetical protein	496	3.6347e-37	0.7035	F:molecular_function; P:biological_process; C:cellular_component		2	0	6.59991	4.51406	15.9559	6.48346e-05	0.000582495
qs_c111430	deoxyribodipyrimidine photolyase family protein	491	6.23336e-28	0.785	F:nucleic acid binding; F:hydrolase activity; F:catalytic activity; P:response to stress; P:DNA metabolic process	-	2	0	6.59991	4.51406	15.9559	6.48346e-05	0.000582495
qs_c111541	retrotransposon expressed	365	5.3906e-30	0.6915	F:binding; F:hydrolase activity; P:metabolic process; F:nucleotide binding	-	2	0	6.59991	4.51406	15.9559	6.48346e-05	0.000582495
qs_c11155	---NA---	474			-		2	0	6.59991	4.51406	15.9559	6.48346e-05	0.000582495
qs_c111564	ribonucleases p mrp protein subunit	416	2.32363e-20	0.6605	P:tRNA 5'-leader removal; F:ribonuclease P activity; P:RNA processing		2	0	6.59991	4.51406	15.9559	6.48346e-05	0.000582495
qs_c111573	gdp-mannose transporter gonst2-like	478	9.08374e-73	0.8755	F:transporter activity; P:transport; C:Golgi apparatus; C:membrane	-	2	0	6.59991	4.51406	15.9559	6.48346e-05	0.000582495
qs_c111624	protein	491	1.92947e-76	0.89	F:motor activity; F:binding; P:protein metabolic process; P:cellular process; P:response to stress; C:cytoskeleton; P:transport; P:cellular component organization; P:response to abiotic stimulus; C:membrane; C:vacuole; F:nucleotide binding; C:mitochondrion; C:plastid; P:biological_process; C:ribosome; C:Golgi apparatus; C:plasma membrane	-	2	0	6.59991	4.51406	15.9559	6.48346e-05	0.000582495
qs_c111706	ubiquitin-like protein	477	7.21046e-19	0.8395	F:molecular_function		2	0	6.59991	4.51406	15.9559	6.48346e-05	0.000582495
qs_c111758	receptor-like protein 12-like	521	8.99694e-46	0.6655	F:catalytic activity	-	2	0	6.59991	4.51406	15.9559	6.48346e-05	0.000582495
qs_c111790	probable leucine-rich repeat receptor-like serine threonine-protein kinase at3g14840-like	514	3.66778e-51	0.7815	P:metabolic process; F:nucleotide binding; P:cellular protein modification process; P:signal transduction; F:kinase activity; F:signal transducer activity; F:catalytic activity	EC:2.7.11.25; EC:1.3.1.74	2	0	6.59991	4.51406	15.9559	6.48346e-05	0.000582495
qs_c111803	chloride channel protein clc-a	495	1.17931e-05	0.8695	P:transport; P:cellular process; F:transporter activity; P:cell growth; P:carbohydrate metabolic process; C:membrane; P:response to extracellular stimulus; P:cell communication; P:response to stress; C:vacuole; P:biological_process; P:cellular homeostasis	-	2	0	6.59991	4.51406	15.9559	6.48346e-05	0.000582495
qs_c111876	cysteine synthase 2-like	511	1.07537e-26	0.548	; F:catalytic activity	-	2	0	6.59991	4.51406	15.9559	6.48346e-05	0.000582495
qs_c111878	protein	498	3.46473e-11	0.65	F:molecular_function; P:biological_process; C:cellular_component		2	0	6.59991	4.51406	15.9559	6.48346e-05	0.000582495
qs_c112028	dihydrodipicolinate synthase	434	5.0365e-56	0.9355	P:biosynthetic process; P:cellular process; ; C:plastid; F:catalytic activity	EC:4.2.1.52	2	0	6.59991	4.51406	15.9559	6.48346e-05	0.000582495
qs_c112211	cohesin subunit	437	1.20389e-13	0.6878	P:metabolic process; P:cellular process; P:regulation of gene expression, epigenetic; P:cellular component organization; P:cell cycle	-	2	0	6.59991	4.51406	15.9559	6.48346e-05	0.000582495
qs_c112314	anaphase-promoting complex subunit 6-like	555	1.22565e-42	0.8915	P:regulation of gene expression, epigenetic; ; P:cellular component organization; F:protein binding; P:DNA metabolic process; P:cell cycle; P:cellular process; P:cellular protein modification process; P:biosynthetic process; P:response to stress; P:anatomical structure morphogenesis; P:cell growth; P:multicellular organismal development; P:cell differentiation; P:reproduction; P:nucleobase-contai…	-	2	0	6.59991	4.51406	15.9559	6.48346e-05	0.000582495
qs_c112341	uncharacterized loc101215663	397	1.06062e-28	0.688	-		2	0	6.59991	4.51406	15.9559	6.48346e-05	0.000582495
qs_c112344	translation initiation factor eif-2b subunit gamma-like	422	7.70229e-37	0.733	P:biosynthetic process; F:transferase activity	-	2	0	6.59991	4.51406	15.9559	6.48346e-05	0.000582495
qs_c112346	bifunctional phosphatase chloroplastic-like	529	4.19481e-27	0.9215	F:hydrolase activity; P:cellular process; P:lipid metabolic process; P:metabolic process; P:biosynthetic process; ; C:plastid	EC:3.1.3.15; EC:3.1.3.7; EC:3.1.3.25	2	0	6.59991	4.51406	15.9559	6.48346e-05	0.000582495
qs_c112374	probable carboxylesterase 18-like	516	8.09342e-58	0.7555	P:metabolic process; F:hydrolase activity	-	2	0	6.59991	4.51406	15.9559	6.48346e-05	0.000582495
qs_c112468	probable alpha-amylase 2-like	525	2.48992e-16	0.8785	F:hydrolase activity; P:carbohydrate metabolic process; C:extracellular region; F:binding	EC:3.2.1.60; EC:3.2.1.1	2	0	6.59991	4.51406	15.9559	6.48346e-05	0.000582495
qs_c112476	trichome birefringence-like 13 protein	517	6.96848e-42	0.896	C:mitochondrion; C:Golgi apparatus	-	2	0	6.59991	4.51406	15.9559	6.48346e-05	0.000582495
qs_c112728	elongation factor-like protein	516	3.77043e-15	0.6705	C:intracellular; P:nucleobase-containing compound metabolic process; P:catabolic process; F:hydrolase activity; F:nucleotide binding	-	2	0	6.59991	4.51406	15.9559	6.48346e-05	0.000582495
qs_c112757	probable lrr receptor-like serine threonine-protein kinase at3g47570-like	516	4.36969e-24	0.61	F:binding; F:kinase activity; P:metabolic process	-	2	0	6.59991	4.51406	15.9559	6.48346e-05	0.000582495
qs_c112836	protein zeu1	200	5.71332e-09	0.722	C:cytosol; C:mitochondrion; F:kinase activity; C:nucleoplasm; P:metabolic process; P:cellular process	EC:2.7.4.9	2	0	6.59991	4.51406	15.9559	6.48346e-05	0.000582495
qs_c113069	r2r3-myb transcription	403	3.50069e-35	0.6125	F:DNA binding	-	2	0	6.59991	4.51406	15.9559	6.48346e-05	0.000582495
qs_c113299	ferredoxin--nadp leaf chloroplastic-like	106	5.78017e-08	0.955	C:thylakoid; F:RNA binding; P:generation of precursor metabolites and energy; P:photosynthesis; F:catalytic activity; F:molecular_function; P:response to stress; P:response to biotic stimulus; C:plastid; C:membrane; F:nucleotide binding; C:extracellular region	EC:1.6.99.1; EC:1.18.1.2	2	0	6.59991	4.51406	15.9559	6.48346e-05	0.000582495
qs_c113410	duf246 domain-containing protein at1g04910-like	441	1.07728e-33	0.592	C:Golgi apparatus	-	2	0	6.59991	4.51406	15.9559	6.48346e-05	0.000582495
qs_c122721	pentatricopeptide repeat-containing protein at1g77405-like	282	2.05842e-44	0.834	P:biological_process		17	0	6.52079	8.16511	152.837	4.1586e-35	3.86675e-32
qs_c14392	formin-like protein 13-like	554	8.96929e-83	0.742	F:protein binding; P:cellular component organization; P:cellular process	-	15	0	6.51338	8.15791	152.262	5.55225e-35	4.52324e-32
qs_c56518	arm repeat protein interacting with abf2-like	479	3.1725e-86	0.917	C:nucleoplasm; F:protein binding; F:transporter activity; P:response to stress; P:response to abiotic stimulus; P:post-embryonic development; P:response to endogenous stimulus; P:cellular process; P:transport; C:plasma membrane	-	11	0	6.48334	8.12877	149.949	1.77914e-34	1.39143e-31
qs_c22590	nad h dehydrogenase s	430	3.82848e-41	0.808	P:nucleobase-containing compound metabolic process; P:carbohydrate metabolic process; P:catabolic process; P:secondary metabolic process; P:biosynthetic process; P:cellular process; P:lipid metabolic process; P:cellular component organization; P:generation of precursor metabolites and energy; P:photosynthesis; C:plastid; C:membrane; F:catalytic activity	EC:1.6.5.2	15	0	6.47573	8.12139	149.366	2.38543e-34	1.79385e-31
qs_c17042	nuclear transcription factor y subunit b-4	492	2.06874e-20	0.719	F:sequence-specific DNA binding transcription factor activity; F:DNA binding; C:intracellular; F:protein binding;	-	11	0	6.32299	7.97349	137.962	7.42922e-32	4.15018e-29
qs_c20057	serine protease kazal-type family protein	514	2.27129e-13	0.844	F:enzyme regulator activity; C:plasma membrane	-	14	0	6.19909	7.85391	129.125	6.36767e-30	2.59377e-27
qs_c17632	probable lrr receptor-like serine threonine-protein kinase at4g08850-like	508	4.55365e-44	0.734	F:kinase activity; C:membrane; F:nucleotide binding	-	13	0	6.09369	7.75246	121.9	2.42803e-28	8.63142e-26
qs_c126494	hypothetical protein VITISV_000226	394	1.00303e-05	0.8	F:transferase activity; F:binding	EC:2.3.1.20	12	0	6.03278	7.69397	117.847	1.87292e-27	6.20668e-25
qs_c20574	lrr receptor-like serine threonine-protein kinase gso1-like	486	1.81317e-48	0.8215	P:embryo development; P:multicellular organismal development; F:receptor activity; P:cellular protein modification process; F:nucleotide binding; F:catalytic activity; C:membrane; F:kinase activity; P:signal transduction; P:metabolic process	EC:1.3.1.74; EC:2.7.11.0	9	0	5.97997	7.64334	114.407	1.06149e-26	3.34747e-24
qs_c18122	protein	539	1.41279e-10	0.7565	F:lipid binding; P:signal transduction	-	12	0	5.96917	7.633	113.711	1.50718e-26	4.5336e-24
qs_c8641	probable ufm1-specific protease-like	452	5.30349e-22	0.973	F:molecular_function; P:biological_process; C:cellular_component		14	0	5.82674	8.43292	162.269	3.61307e-37	3.9246e-34
qs_c22529	ac009360_1est gb	305	1.26385e-32	0.845	C:endoplasmic reticulum; C:plasma membrane	-	10	0	5.82093	7.49134	104.451	1.61111e-24	4.1448e-22
qs_c20251	lon protease mitochondrial-like	337	1.82484e-65	0.9935	F:protein binding; P:cellular component organization; P:cellular process; F:hydrolase activity; F:DNA binding; F:transferase activity; P:protein metabolic process; P:catabolic process; C:plastid; C:mitochondrion; F:RNA binding; C:cytosol; P:reproduction; P:cell differentiation; P:multicellular organismal development; P:response to stress; P:DNA metabolic process; P:biosynthetic process; P:nucleob…	EC:3.4.21.0; EC:2.7.7.49	10	0	5.77207	7.4448	101.515	7.09235e-24	1.61373e-21
qs_rep_c37450	protein	212	1.04183e-16	0.871	F:nucleotide binding; F:catalytic activity; P:metabolic process	EC:1.21.3.3; EC:1.1.1.158	26	0	5.76087	8.93191	196.44	1.2496e-44	4.07202e-41
qs_c14416	uncharacterized loc101207834	584	4.95135e-28	0.7745	C:cellular_component; F:molecular_function; P:biological_process		18	0	5.73431	7.40888	99.2848	2.18678e-23	4.50062e-21
qs_c18939	mlo-like protein 1	481	1.59473e-15	0.746	P:response to stress; F:protein binding; C:membrane; P:cell death; C:plasma membrane	-	8	0	5.73431	7.40888	99.2848	2.18678e-23	4.50062e-21
qs_c16082	gibberellin 2-beta-dioxygenase 8-like	483	1.52352e-95	0.8535	P:metabolic process; F:catalytic activity	EC:1.14.11.15; EC:1.13.11.0	8	0	5.7215	7.3967	98.536	3.19173e-23	6.43347e-21
qs_c16648	probable s-acyltransferase at2g14255-like	541	8.17868e-25	0.917	C:membrane; F:catalytic activity; P:metabolic process; F:binding; F:transferase activity	EC:1.3.1.74	11	0	5.69554	7.37204	97.03	6.82841e-23	1.32187e-20
qs_rep_c56304	---NA---	128			-		31	0	5.68887	9.2656	219.385	1.23186e-49	6.84449e-46
qs_c14634	nadh-plastoquinone oxidoreductase subunit 2	509	1.37283e-52	0.9785	C:plasma membrane; F:binding; F:catalytic activity; P:transport; C:membrane; P:generation of precursor metabolites and energy; P:photosynthesis; C:thylakoid; C:plastid	EC:1.6.5.3	11	0	5.66909	7.34695	95.5129	1.4693e-22	2.72156e-20
qs_c57323	flavonol synthase flavanone 3-	430	2.45512e-27	0.8155	P:biosynthetic process; ; P:secondary metabolic process; P:metabolic process; F:catalytic activity	EC:1.14.11.23	9	0	5.64216	7.32141	93.9845	3.18006e-22	5.75709e-20
qs_rep_c36023	50s ribosomal protein l3	193	2.71497e-20	0.9265	P:translation; C:ribosome; P:nucleobase-containing compound metabolic process; P:biosynthetic process; P:carbohydrate metabolic process; P:cellular process; P:lipid metabolic process; F:structural molecule activity; C:plastid; P:cellular component organization; P:generation of precursor metabolites and energy; P:photosynthesis; P:transport; C:membrane	-	26	0	5.63381	8.80868	184.827	4.28144e-42	8.37106e-39
qs_c8719	nuclease harbi1-like	601	3.40553e-85	0.608	C:cytoplasmic membrane-bounded vesicle		17	0	5.61471	7.29542	92.4446	6.92358e-22	1.18746e-19
qs_c56938	low quality protein: proteasome activator complex subunit 4-like	410	1.727e-64	0.8725	C:cellular_component		9	0	5.58673	7.26895	90.8931	1.51647e-21	2.45042e-19
qs_c22818	e3 ubiquitin-protein ligase upl2-like	268	5.0334e-27	0.878	C:intracellular; P:cellular protein modification process; F:catalytic activity	EC:6.3.2.0	9	0	5.5582	7.24198	89.3298	3.34184e-21	5.10466e-19
qs_c22669	auxin-responsive protein	238	2.44715e-31	0.781	P:response to endogenous stimulus	-	9	0	5.52909	7.2145	87.7546	7.41007e-21	1.08934e-18
qs_c20283	protein	410	5.45739e-05	0.784	F:molecular_function; P:biological_process; C:cellular_component		9	0	5.51431	7.20056	86.9624	1.10601e-20	1.61379e-18
qs_c127176	probable beta- -galactosyltransferase 11-like	368	1.76121e-33	0.823	F:transferase activity; C:Golgi apparatus; P:biosynthetic process; P:cellular protein modification process; P:carbohydrate metabolic process; C:membrane; C:mitochondrion	EC:2.4.1.134	9	0	5.49938	7.18648	86.1673	1.65342e-20	2.36331e-18
qs_c122914	abc transporter d family member	338	4.35426e-29	0.9755	P:transport; P:response to stress; P:response to biotic stimulus; P:catabolic process; P:cellular process; P:lipid metabolic process; P:protein metabolic process; P:secondary metabolic process; C:membrane; C:peroxisome; P:cellular component organization; P:post-embryonic development; F:hydrolase activity; F:transporter activity; P:nucleobase-containing compound metabolic process; F:nucleotide bin…	EC:3.6.3.44	9	0	5.48429	7.17227	85.369	2.47571e-20	3.40881e-18
qs_rep_c53078	chalcone synthase	419	4.93895e-25	0.884	P:response to stress; F:transferase activity; P:response to endogenous stimulus; P:response to abiotic stimulus; P:transport; P:response to external stimulus; C:membrane; C:vacuole; P:biosynthetic process; ; P:secondary metabolic process; C:endoplasmic reticulum; C:nucleus	EC:2.3.1.74	16	0	5.46277	8.64334	169.765	8.3258e-39	1.2522e-35
qs_rep_c44091	---NA---	101			-		24	0	5.44846	8.06865	132.778	1.0113e-30	4.59836e-28
qs_c22369	atp-dependent helicase	561	7.29168e-48	0.632	P:virus induced gene silencing; F:helicase activity; F:ATP binding; F:nucleotide binding; F:nucleoside-triphosphatase activity		16	0	5.43806	7.12877	82.9556	8.39163e-20	1.1086e-17
qs_c62647	nadph dehydrogenase	463	2.45197e-41	0.6825	C:mitochondrion	-	7	0	5.43806	7.12877	82.9556	8.39163e-20	1.1086e-17
qs_c62330	nucleic acid binding protein	451	3.86759e-36	0.898	F:nucleic acid binding; F:nuclease activity; C:mitochondrion	EC:3.1.26.4	7	0	5.42231	7.11397	82.1449	1.26468e-19	1.65953e-17
qs_c30644	serine-threonine protein plant-	490	6.32661e-40	0.776	F:kinase activity; F:catalytic activity; P:signal transduction; P:metabolic process; P:cellular process	EC:1.3.1.74	7	0	5.40639	7.09902	81.331	1.9091e-19	2.48845e-17
qs_c18066	pfkb-like carbohydrate kinase family protein	742	1.91046e-121	0.7855	F:kinase activity; P:biosynthetic process; P:carbohydrate metabolic process; P:cellular process; F:transferase activity; P:metabolic process	EC:2.7.1.0	15	0	5.3885	6.2145	48.2388	3.7734e-12	1.69214e-10
qs_c13739	peroxisome biogenesis protein 7-like	462	1.00686e-50	0.9035	F:binding; C:peroxisome; P:transport; P:cellular component organization; P:cellular process; C:intracellular; F:receptor activity; P:catabolic process; P:lipid metabolic process; F:protein binding; P:cellular protein modification process; F:transferase activity	EC:2.3.1.48	7	0	5.37402	7.06865	79.6936	4.37224e-19	5.51523e-17
qs_c15689	kxdl motif-containing protein cg10681-like isoform 1	477	6.09374e-61	0.871	F:molecular_function; P:biological_process; C:cellular_component		7	0	5.37402	7.06865	79.6936	4.37224e-19	5.51523e-17
qs_c11921	non-functional nadph-dependent codeinone reductase 2-like	476	9.98741e-64	0.824	P:transport; F:catalytic activity; P:response to stress; P:response to abiotic stimulus; P:metabolic process	EC:1.1.1.203; EC:1.1.1.19	7	0	5.3409	7.03762	78.0432	1.00812e-18	1.19459e-16
qs_c17876	glutamate receptor -like	323	1.21955e-37	0.8975	F:transporter activity; C:external encapsulating structure; F:receptor activity; C:membrane; P:response to abiotic stimulus; C:plasma membrane; P:transport; P:signal transduction; P:cellular homeostasis	-	15	0	5.3409	7.03762	78.0432	1.00812e-18	1.19459e-16
qs_c6335	uncharacterized protein LOC100306325	547	1.42418e-10	0.6181	P:transport; P:cellular component organization; P:cellular process; C:intracellular; P:reproduction; P:cell differentiation; P:multicellular organismal development	-	9	0	5.3409	7.03762	78.0432	1.00812e-18	1.19459e-16
qs_c23050	bacterial-induced peroxidase	519	1.2998e-77	0.836	P:response to stress; F:binding; C:cell wall; P:response to biotic stimulus; F:catalytic activity; P:metabolic process; C:membrane; C:extracellular region	EC:1.11.1.7	9	0	5.32405	7.02185	77.2131	1.53472e-18	1.74154e-16
qs_c68080	abc transporter family protein	384	1.86092e-53	0.9175	F:hydrolase activity; P:nucleobase-containing compound metabolic process; P:catabolic process; F:nucleotide binding; P:response to abiotic stimulus	EC:3.6.1.3	8	0	5.28975	6.98979	75.543	3.57537e-18	3.92728e-16
qs_c60823	ent-kaurene oxidase	163	2.20403e-14	0.821	F:molecular_function; F:oxygen binding; C:cell; F:binding; P:biosynthetic process; P:cellular process; P:lipid metabolic process; P:secondary metabolic process; P:signal transduction; P:response to endogenous stimulus; C:membrane; C:plastid; C:endoplasmic reticulum; F:catalytic activity	EC:1.14.13.78	8	0	5.27229	6.97349	74.7029	5.47149e-18	5.94325e-16
qs_rep_c43656	elongation factor 2-like	166	6.20013e-20	0.956	C:cytosol; F:binding; F:translation factor activity, nucleic acid binding; C:nucleolus; P:response to stress; P:response to abiotic stimulus; P:translation; P:nucleobase-containing compound metabolic process; P:catabolic process; F:hydrolase activity; C:plastid; F:nucleotide binding; C:plasma membrane	-	23	0	5.25643	8.4448	152.496	4.93572e-35	4.19579e-32
qs_c15620	g-type lectin s-receptor-like serine threonine-protein kinase sd2-5-like	281	5.24982e-12	0.6833	F:kinase activity; P:cellular protein modification process; F:nucleotide binding	-	8	0	5.23672	6.94032	73.0127	1.28819e-17	1.29828e-15
qs_c15698	probable polyamine transporter at1g31830-like	549	1.884e-92	0.914	C:membrane; F:transporter activity; P:transport; P:cellular process	-	9	0	5.23672	6.94032	73.0127	1.28819e-17	1.29828e-15
qs_c59401	chromo domain-like protein	346	3.72907e-47	0.8615	F:RNA binding; F:transferase activity; P:DNA metabolic process; P:biosynthetic process	EC:2.7.7.49	8	0	5.23672	6.94032	73.0127	1.28819e-17	1.29828e-15
qs_c59817	phosphoribosylformylglycinamidine synthase	365	8.59569e-32	0.8455	C:mitochondrion; F:nucleotide binding; F:transferase activity; C:plastid; P:multicellular organismal development; P:nucleobase-containing compound metabolic process; P:biosynthetic process; F:catalytic activity	EC:6.3.5.3	8	0	5.23672	6.94032	73.0127	1.28819e-17	1.29828e-15
qs_c126444	protein longifolia 1-like	745	1.27288e-73	0.719	F:molecular_function; P:biological_process; C:cellular_component		13	0	5.19202	6.03762	42.131	8.53586e-11	3.143e-09
qs_c21332	probable protein phosphatase 2c 63-like	567	4.20815e-15	0.751	F:molecular_function; P:biological_process; P:response to stress		14	0	5.16284	6.87161	69.5911	7.29644e-17	6.63535e-15
qs_rep_c48788	pollen-specific protein sf3-like	389	1.37153e-31	0.9065	F:binding	-	18	0	5.1609	8.35326	144.845	2.32162e-33	1.62115e-30
qs_c12055	pinus taeda anonymous locus 0_8252_01 genomic sequence	647	8.3272e-25	0.7335	F:molecular_function; P:biological_process; P:phosphatidylinositol biosynthetic process; C:cellular_component		8	0	5.1565	6.00591	41.0965	1.44898e-10	5.01295e-09
qs_c18082	sec-independent protein translocase protein chloroplastic-like	624	8.33724e-68	0.7515	F:protein binding; F:transporter activity; P:transport; P:cellular process; P:anatomical structure morphogenesis; P:post-embryonic development; C:membrane; C:plastid; P:cellular component organization; C:thylakoid; C:plasma membrane	-	14	0	5.14376	6.85391	68.7271	1.13079e-16	1.00496e-14
qs_c20270	probable mitochondrial chaperone bcs1-b-like	667	3.4825e-64	0.694	F:hydrolase activity; F:nucleotide binding	EC:3.6.1.15	12	0	5.12009	5.97349	40.0572	2.46638e-10	8.29995e-09
qs_rep_c34570	protein	1214	0	0.8305	F:catalytic activity; F:binding; P:metabolic process	EC:1.14.11.19; EC:1.13.11.0	48	1	5.08274	5.94032	39.0131	4.20975e-10	1.36273e-08
qs_c6105	tmv resistance protein n-like	255	1.28563e-17	0.7305	P:response to stress; F:nucleotide binding	-	7	0	5.04439	6.76199	64.3535	1.03982e-15	8.47106e-14
qs_rep_c123212	histidine--trna ligase-like	331	4.71456e-50	0.9275	C:cytosol; P:nucleobase-containing compound metabolic process; P:translation; ; C:plastid; F:catalytic activity; P:flower development; F:nucleotide binding	EC:4.3.1.0; EC:6.1.1.21	18	0	5.03005	8.2283	134.724	3.79332e-31	1.80895e-28
qs_rep_c51533	---NA---	462			-		11	0	5.03005	8.2283	134.724	3.79332e-31	1.80895e-28
qs_rep_c48618	p-type h+-atpase	349	3.15113e-53	0.9705	-		20	0	5.02304	7.66381	103.786	2.25396e-24	5.50867e-22
qs_c24178	pentatricopeptide repeat-containing protein at5g55840-like	429	7.16478e-58	0.773	-		7	0	5.00265	6.72351	62.5789	2.55976e-15	2.00194e-13
qs_c31114	f-box wd-40 repeat-containing protein at5g21040-like	365	4.74359e-11	0.7935	C:intracellular; P:response to extracellular stimulus; P:cell communication; P:response to stress; C:plastid	-	7	0	5.00265	6.72351	62.5789	2.55976e-15	2.00194e-13
qs_c58733	exostosin family protein	484	3.38118e-20	0.8095	C:membrane; C:Golgi apparatus; F:transferase activity; P:biosynthetic process; P:carbohydrate metabolic process; P:cellular process	-	6	0	5.00265	6.72351	62.5789	2.55976e-15	2.00194e-13
qs_rep_c45911	histone deacetylase 15-like	464	1.63322e-44	0.7435	P:biological_process; P:cellular component organization; P:cellular protein modification process; C:intracellular; P:reproduction; P:response to abiotic stimulus; P:post-embryonic development; F:binding; F:hydrolase activity	-	11	0	4.99354	8.19354	131.976	1.51438e-30	6.43677e-28
qs_c21962	unnamed protein product	400	3.41793e-13	0.6782	F:binding	-	7	0	4.98132	6.70388	61.6862	4.02801e-15	2.97191e-13
qs_rep_c44026	proteasome subunit alpha type-4-like isoform 1	417	1.73246e-08	0.9775	C:cytoplasm; C:intracellular; F:nucleic acid binding; P:protein metabolic process; P:catabolic process; P:cellular process; C:nucleus; F:hydrolase activity	EC:3.4.25.0	20	0	4.97936	7.62258	101.062	8.91593e-24	1.91565e-21
qs_c19146	dnaj heat shock n-terminal domain-containing protein	393	9.10337e-55	0.8815	P:protein metabolic process; P:cellular process; F:protein binding; P:response to stress; P:response to abiotic stimulus; C:plastid; P:cell cycle	-	7	0	4.95966	6.68398	60.7897	6.35088e-15	4.58201e-13
qs_c31869	tryptophan synthase beta chain chloroplastic-like	650	6.31969e-73	0.852	P:response to stress; P:metabolic process; P:response to abiotic stimulus; F:catalytic activity; C:plastid; P:biosynthetic process; ; F:binding	EC:4.2.1.20; EC:1.3.1.74	13	0	4.95966	6.68398	60.7897	6.35088e-15	4.58201e-13
qs_c58052	endo- -beta-glucanase	466	2.44054e-61	0.819	P:flower development; P:biosynthetic process; P:cellular process; P:lipid metabolic process; P:cell growth; P:cellular component organization; P:multicellular organismal development; P:growth; P:response to external stimulus; P:response to abiotic stimulus; P:anatomical structure morphogenesis; P:cell differentiation; F:hydrolase activity; P:metabolic process; P:carbohydrate metabolic process; P:…	EC:3.2.1.4	6	0	4.95966	6.68398	60.7897	6.35088e-15	4.58201e-13
qs_rep_c51447	cadmium-induced protein	518	9.85285e-09	0.61	-		14	0	4.94084	8.14341	128.066	1.08591e-29	4.33301e-27
qs_c15776	cytochrome p450	346	9.79546e-44	0.8685	P:reproduction; P:post-embryonic development; F:binding; F:molecular_function; F:catalytic activity; P:metabolic process; F:oxygen binding	EC:1.14.13.21	7	0	4.93768	6.66381	59.8896	1.00332e-14	7.03112e-13
qs_c25098	dna-damage-repair toleration protein drt102-like	468	1.83499e-07	0.6667	P:carbohydrate metabolic process	-	6	0	4.93768	6.66381	59.8896	1.00332e-14	7.03112e-13
qs_c31988	protein bonzai 3-like	471	1.57521e-28	0.8765	P:cell death	-	6	0	4.93768	6.66381	59.8896	1.00332e-14	7.03112e-13
qs_c11602	23 kda jasmonate-induced	661	9.21226e-23	0.5075	-		7	0	4.92283	5.79946	34.7891	3.67432e-09	9.88176e-08
qs_c14850	protein transparent testa 12-like	687	1.25651e-29	0.836	P:transport; P:cellular process; C:membrane; F:transporter activity	-	11	0	4.92283	5.79946	34.7891	3.67432e-09	9.88176e-08
qs_c16897	omega-6 endoplasmic reticulum	758	8.45061e-162	0.9325	C:membrane; C:endoplasmic reticulum; F:catalytic activity; P:biosynthetic process; P:cellular process; P:lipid metabolic process; P:metabolic process	EC:1.14.99.33; EC:1.14.19.0	11	0	4.92283	5.79946	34.7891	3.67432e-09	9.88176e-08
qs_c19398	serine-threonine protein plant-	513	4.03794e-69	0.838	F:kinase activity; P:metabolic process; P:cellular process	-	11	0	4.92283	5.79946	34.7891	3.67432e-09	9.88176e-08
qs_c21173	cytochrome p450 94a1-like	802	2.90179e-80	0.744	P:response to endogenous stimulus; P:metabolic process; P:response to biotic stimulus; F:catalytic activity; P:response to external stimulus; P:response to stress; P:reproduction; P:biosynthetic process; P:cellular process; P:lipid metabolic process; F:molecular_function; F:oxygen binding; P:flower development; P:biological_process; P:multicellular organismal development; F:binding	EC:1.14.14.1	16	0	4.92283	5.79946	34.7891	3.67432e-09	9.88176e-08
qs_c23741	non-specific lipid-transfer	449	1.33417e-51	0.771	F:lipid binding; P:cellular component organization; P:cellular process; P:metabolic process; P:post-embryonic development; C:peroxisome; P:transport; P:catabolic process; P:lipid metabolic process; P:biosynthetic process; P:secondary metabolic process; P:reproduction; P:signal transduction; P:response to endogenous stimulus	-	6	0	4.91535	6.64334	58.9857	1.5882e-14	1.07448e-12
qs_c23868	wall-associated receptor kinase	483	6.52936e-20	0.6485	F:nucleotide binding; P:biological_process; P:cellular protein modification process; F:kinase activity	EC:2.7.11.0	6	0	4.91535	6.64334	58.9857	1.5882e-14	1.07448e-12
qs_c14325	probable trehalase-like	445	5.11681e-16	0.8865	P:carbohydrate metabolic process; P:cellular process; P:catabolic process; F:hydrolase activity; C:plasma membrane	EC:3.2.1.28	6	0	4.86964	6.60152	57.1668	4.00372e-14	2.57502e-12
qs_c18431	udp-glycosyltransferase 73c3-like	572	1.57052e-59	0.7095	F:transferase activity	EC:2.4.1.0	12	0	4.86964	6.60152	57.1668	4.00372e-14	2.57502e-12
qs_c20287	transcription initiation factor iib	491	3.14848e-29	0.8325	C:cytoplasm; P:translation; P:cellular component organization; ; F:translation factor activity, nucleic acid binding; P:nucleobase-containing compound metabolic process; C:nucleus; F:binding	-	6	0	4.86964	6.60152	57.1668	4.00372e-14	2.57502e-12
qs_c23371	hypothetical protein VITISV_027119	464	2.30888e-10	0.6671	-		6	0	4.86964	6.60152	57.1668	4.00372e-14	2.57502e-12
qs_c7047	transcription factor e2f	506	2.22255e-49	0.895	P:cellular process; P:anatomical structure morphogenesis; P:cellular component organization; P:cell differentiation; P:multicellular organismal development; ; C:nucleoplasm; P:cell cycle; F:DNA binding; P:response to endogenous stimulus; F:sequence-specific DNA binding transcription factor activity; C:cytoplasm	-	7	0	4.86964	6.60152	57.1668	4.00372e-14	2.57502e-12
qs_rep_c52399	nudix hydrolase mitochondrial-like	207	8.96667e-09	0.9067	F:hydrolase activity	-	19	0	4.85449	8.27561	133.707	6.33351e-31	2.9484e-28
qs_c4386	dna binding	1054	2.458e-61	0.665	F:protein dimerization activity		25	0	4.8357	5.72351	32.6486	1.10419e-08	2.70202e-07
qs_c6926	udp-glycosyltransferase 76f1-like	1630	1.22342e-172	0.806	F:transferase activity; P:metabolic process	EC:2.4.1.115	64	2	4.8357	5.72351	32.6486	1.10419e-08	2.70202e-07
qs_c8560	transcription factor myb558	478	2.01824e-14	0.81	F:DNA binding	-	8	0	4.82751	7.47984	91.9553	8.8656e-22	1.48154e-19
qs_c11320	isochorismate synthase	486	0.00151833	0.7777	P:cellular process; P:response to stress; P:response to biotic stimulus; C:plastid; F:catalytic activity; P:biosynthetic process	EC:5.4.4.2	6	0	4.82243	6.55845	55.3328	1.01754e-13	6.12152e-12
qs_c23313	transducin family protein	509	1.83503e-39	0.616	C:cytosol	-	7	0	4.82243	6.55845	55.3328	1.01754e-13	6.12152e-12
qs_c23644	myosin 2	524	1.47423e-11	0.838	F:enzyme regulator activity; F:protein binding; P:anatomical structure morphogenesis; P:cell differentiation; P:cell growth; P:multicellular organismal development; C:peroxisome; P:cellular process; C:cytoskeleton; P:cellular component organization; F:nucleotide binding; F:motor activity; P:transport	-	7	0	4.82243	6.55845	55.3328	1.01754e-13	6.12152e-12
qs_c24101	nbs-lrr resistance protein	524	1.36465e-18	0.62	F:ADP binding; P:defense response; P:regulation of transcription, DNA-dependent; F:sequence-specific DNA binding; F:sequence-specific DNA binding transcription factor activity		7	0	4.82243	6.55845	55.3328	1.01754e-13	6.12152e-12
qs_c4801	saur-like auxin-responsive protein	563	3.36196e-43	0.723	P:response to endogenous stimulus	-	21	1	4.79346	7.75246	104.557	1.5273e-24	3.98157e-22
qs_c20311	dctp pyrophosphatase 1-like	557	5.48083e-37	0.929	-		11	0	4.77362	6.51406	53.4837	2.60744e-13	1.482e-11
qs_c20452	gem-associated protein 2-like	497	1.96424e-19	0.6353	P:mRNA splicing, via spliceosome; P:spliceosomal complex assembly; P:embryo sac egg cell differentiation; F:molecular_function; P:karyogamy; C:cellular_component		7	0	4.77362	6.51406	53.4837	2.60744e-13	1.482e-11
qs_rep_c56113	conserved hypothetical protein	361	0.000220577	0.83	-		19	0	4.75981	8.37204	136.97	1.22397e-31	6.29767e-29
qs_c11389	protein	523	4.33862e-63	0.748	-		7	0	4.74859	6.49134	52.5534	4.18698e-13	2.29311e-11
qs_c18345	pathogenesis-related protein 1	571	1.32826e-68	0.8365	P:response to stress; P:cell death; C:cell wall; P:response to biotic stimulus; P:signal transduction; P:cellular process; P:response to endogenous stimulus; C:intracellular; P:response to extracellular stimulus; P:biological_process; P:transport; C:extracellular region; P:metabolic process; P:biosynthetic process	-	11	0	4.74859	6.49134	52.5534	4.18698e-13	2.29311e-11
qs_c21971	yeast pheromone receptor	828	8.46788e-30	0.6265	P:response to abiotic stimulus; P:cellular process; P:signal transduction; P:response to stress; C:plasma membrane	-	14	0	4.74296	5.64334	30.4894	3.35688e-08	7.39118e-07
qs_c25309	gras family transcription factor	402	9.48859e-40	0.781	F:sequence-specific DNA binding transcription factor activity; F:DNA binding;	-	6	0	4.72311	6.46825	51.6193	6.73748e-13	3.50404e-11
qs_c57454	o-glucosyltransferase rumi-like	439	2.42035e-64	0.8305	F:molecular_function; P:biological_process		6	0	4.72311	6.46825	51.6193	6.73748e-13	3.50404e-11
qs_c59142	sucrose transport protein suc3-like	370	4.88929e-21	0.702	C:integral to membrane; P:transmembrane transport; F:sucrose transmembrane transporter activity; P:sucrose transport; P:response to wounding		6	0	4.72311	6.46825	51.6193	6.73748e-13	3.50404e-11
qs_c61272	vesicle transport protein sft2b	241	8.58331e-37	0.966	P:biosynthetic process; ; P:transport; P:cellular process; P:lipid metabolic process; C:membrane; P:nucleobase-containing compound metabolic process	-	6	0	4.72311	6.46825	51.6193	6.73748e-13	3.50404e-11
qs_rep_c37547	19-like isoform 1	480	1.65251e-54	0.862	-		17	0	4.68523	7.34695	83.9314	5.12238e-20	6.85978e-18
qs_rep_c126371	udp-glucose flavonoid 3-o-glucosyltransferase 3-like	309	7.089e-45	0.8425	P:biosynthetic process; ; P:secondary metabolic process; F:transferase activity; P:response to endogenous stimulus; C:membrane; P:response to stress; P:response to abiotic stimulus	EC:2.4.1.115	14	0	4.67185	7.8891	109.187	1.47707e-25	4.18547e-23
qs_rep_c53819	dehydrin 3	320	1.00379e-05	0.6175	-		10	0	4.67185	7.8891	109.187	1.47707e-25	4.18547e-23
qs_c13206	folylpolyglutamate synthase	401	7.21749e-10	0.767	P:biosynthetic process; P:cellular process; F:catalytic activity; C:cytoplasm	-	6	0	4.67076	6.42095	49.7396	1.75566e-12	8.49671e-11
qs_c13534	sialyltransferase-like protein	422	6.97886e-46	0.935	C:membrane; C:Golgi apparatus; P:pollination; P:anatomical structure morphogenesis; P:cellular component organization; P:cell differentiation; P:cell growth; P:multicellular organismal development; P:biosynthetic process; P:cellular protein modification process; P:carbohydrate metabolic process; P:cellular process; F:transferase activity	-	6	0	4.67076	6.42095	49.7396	1.75566e-12	8.49671e-11
qs_c16429	glutamyl-trna amidotransferase subunit chloroplastic mitochondrial-like	440	4.43514e-42	0.9215	F:catalytic activity; F:nucleotide binding; C:plastid; F:transferase activity; F:hydrolase activity; P:translation; P:biosynthetic process; P:cellular process; P:lipid metabolic process; C:mitochondrion	EC:6.3.5.7; EC:3.5.1.4	6	0	4.67076	6.42095	49.7396	1.75566e-12	8.49671e-11
qs_c9894	ubiquitin-conjugating enzyme	626	1.40105e-28	0.5375	F:ATP binding; F:ligase activity; F:nucleotide binding; F:acid-amino acid ligase activity; P:protein ubiquitination; F:ubiquitin-protein ligase activity		10	0	4.67076	6.42095	49.7396	1.75566e-12	8.49671e-11
qs_rep_c51432	probable protein phosphatase 2c 10-like	396	2.97411e-34	0.845	P:cellular protein modification process; F:hydrolase activity; C:cell; C:plasma membrane	-	14	0	4.65996	8.09149	119.367	8.70452e-28	2.93432e-25
qs_c125772	probable sugar phosphate phosphate translocator at1g12500-like	589	3.80848e-69	0.8085	F:transporter activity; C:membrane; P:cell growth; P:cellular process; P:carbohydrate metabolic process	-	6	0	4.64386	5.55845	28.312	1.03253e-07	2.04127e-06
qs_c11569	g-type lectin s-receptor-like serine threonine-protein kinase at1g67520-like	310	1.23458e-16	0.856	F:receptor activity; F:hydrolase activity; P:carbohydrate metabolic process; P:cellular protein modification process; F:nucleotide binding; F:kinase activity	EC:3.2.1.0; EC:2.7.11.0	6	0	4.64386	6.3967	48.794	2.84314e-12	1.34925e-10
qs_c15242	s-locus-specific glycoprotein s6	613	2.26532e-61	0.7375	P:cellular protein modification process; F:kinase activity; P:cell communication	EC:2.7.11.0	10	0	4.61644	6.37204	47.8445	4.61409e-12	2.04568e-10
qs_c58857	calcium ion binding	488	3.35005e-51	0.739	F:molecular_function; P:biological_process; C:cellular_component		5	0	4.61644	6.37204	47.8445	4.61409e-12	2.04568e-10
qs_c59652	retroelement pol polyprotein	466	1.17791e-47	0.766	F:nuclease activity; F:transferase activity; F:DNA binding; F:RNA binding; P:DNA metabolic process; C:mitochondrion	EC:3.1.26.4; EC:2.7.7.49	5	0	4.61644	6.37204	47.8445	4.61409e-12	2.04568e-10
qs_c61483	abc transporter c family member 10-like	482	1.79548e-68	0.8285	P:transport; P:cellular process; C:membrane; F:hydrolase activity; F:transporter activity; P:nucleobase-containing compound metabolic process; P:catabolic process; F:nucleotide binding; C:plasma membrane	-	5	0	4.61644	6.37204	47.8445	4.61409e-12	2.04568e-10
qs_c63781	alpha beta fold family protein	493	4.45406e-75	0.767	F:hydrolase activity	-	5	0	4.61644	6.37204	47.8445	4.61409e-12	2.04568e-10
qs_rep_c44418	ankyrin-like protein	446	1.43351e-74	0.925	C:Golgi apparatus; P:metabolic process; P:cellular process; F:transferase activity	EC:2.1.1.0	10	0	4.61531	7.83599	105.449	9.73775e-25	2.57287e-22
qs_rep_c45697	serine threonine protein	319	5.84175e-33	0.7215	P:cellular protein modification process; F:nucleotide binding; F:kinase activity	EC:2.7.11.0	13	0	4.57635	7.79946	102.92	3.48987e-24	8.22096e-22
qs_c25118	photosystem i reaction center subunit ii precursor	537	3.62079e-66	0.827	C:plastid; P:cellular protein modification process; P:cellular homeostasis; P:cellular component organization; P:generation of precursor metabolites and energy; P:photosynthesis; C:membrane; C:thylakoid; P:transport; P:biosynthetic process; ; P:cellular process; P:nucleobase-containing compound metabolic process	-	6	0	4.56	6.32141	45.9339	1.22312e-11	5.02403e-10
qs_c25319	chlorophyll a-b binding protein chloroplastic-like	539	1.59313e-102	0.909	C:membrane; C:thylakoid; F:binding; C:intracellular; P:cellular protein modification process; C:plastid; P:cellular homeostasis; P:transport; P:generation of precursor metabolites and energy; P:photosynthesis; P:biosynthetic process;	-	6	0	4.56	6.32141	45.9339	1.22312e-11	5.02403e-10
qs_c25372	benzyl alcohol o-benzoyltransferase-like	489	2.16009e-67	0.8375	F:transferase activity	-	5	0	4.56	6.32141	45.9339	1.22312e-11	5.02403e-10
qs_c26561	u-box domain-containing protein	490	1.54498e-44	0.6795	C:intracellular	-	5	0	4.56	6.32141	45.9339	1.22312e-11	5.02403e-10
qs_c26834	seed storage protein legumin partial	486	1.702e-15	0.735	C:endoplasmic reticulum; F:molecular_function	-	5	0	4.56	6.32141	45.9339	1.22312e-11	5.02403e-10
qs_c27002	phospholipase d delta-like	484	5.86993e-13	0.7325	P:catabolic process; P:lipid metabolic process; F:hydrolase activity; F:binding; C:membrane;	EC:3.1.4.4	5	0	4.56	6.32141	45.9339	1.22312e-11	5.02403e-10
qs_c27911	glycerate dehydrogenase-like	546	1.77532e-103	0.9665	F:nucleotide binding; C:peroxisome; P:biosynthetic process; P:cellular process; F:RNA binding; C:plastid; C:extracellular region; F:catalytic activity; P:metabolic process	EC:1.1.1.29	6	0	4.56	6.32141	45.9339	1.22312e-11	5.02403e-10
qs_c28100	nadp-dependent alkenal double bond reductase p2	538	2.82022e-49	0.766	F:catalytic activity; P:biological_process; F:binding; F:nucleotide binding; P:metabolic process; C:intracellular	-	6	0	4.56	6.32141	45.9339	1.22312e-11	5.02403e-10
qs_c30550	non-structural maintenance of chromosome element 4-like	471	2.47938e-72	0.7785	F:molecular_function; P:biological_process; C:cellular_component		5	0	4.56	6.32141	45.9339	1.22312e-11	5.02403e-10
qs_c56521	protein	538	2.3611e-67	0.8065	P:pollen-pistil interaction; P:cellular protein modification process; F:nucleotide binding; F:kinase activity	EC:2.7.11.0	6	0	4.56	6.32141	45.9339	1.22312e-11	5.02403e-10
qs_c69940	sulfite exporter family protein	548	1.91712e-63	0.815	C:membrane	-	6	0	4.56	6.32141	45.9339	1.22312e-11	5.02403e-10
qs_rep_c36501	cyclic nucleotide-gated ion channel 2-like	885	1.79161e-132	0.9165	F:protein binding; P:transport; P:cellular process; P:response to stress; P:cell death; C:membrane; F:transporter activity; F:nucleotide binding; P:signal transduction	-	23	0	4.56	6.32141	45.9339	1.22312e-11	5.02403e-10
qs_rep_c43948	spermine synthase	804	5.91387e-83	0.8855	C:cytoplasm; P:biosynthetic process; ; P:response to stress; P:response to biotic stimulus; F:protein binding; F:transferase activity; P:metabolic process; P:cellular process	EC:2.5.1.16; EC:2.5.1.22; EC:2.1.1.53	22	0	4.56	6.32141	45.9339	1.22312e-11	5.02403e-10
qs_rep_c54559	calcium-transporting atpase plasma membrane-type-like	772	1.89576e-91	0.8635	C:membrane; C:vacuole; P:response to stress; P:response to abiotic stimulus; P:response to biotic stimulus; C:plastid; P:cell death; F:binding; P:nucleobase-containing compound metabolic process; P:biosynthetic process; P:biological_process; F:hydrolase activity; F:transporter activity; P:transport; P:cellular process; C:plasma membrane; F:protein binding; F:nucleotide binding	EC:3.6.3.8	15	0	4.56	6.32141	45.9339	1.22312e-11	5.02403e-10
qs_rep_c44982	flavonoid 3 -hydroxylase	336	2.97555e-18	0.968	P:response to abiotic stimulus; F:binding; F:catalytic activity; F:molecular_function; P:metabolic process	-	12	0	4.53631	7.76199	100.36	1.27051e-23	2.67108e-21
qs_rep_c51611	6-phosphofructokinase 3-like	505	1.26406e-20	0.857	C:plasma membrane; P:metabolic process; P:cellular process; F:kinase activity; C:cytosol; F:nucleotide binding; P:carbohydrate metabolic process; P:generation of precursor metabolites and energy; P:catabolic process	EC:2.7.1.11; EC:2.7.1.90	12	0	4.53631	7.76199	100.36	1.27051e-23	2.67108e-21
qs_c19677	nbs-containing resistance-like protein	501	1.18828e-08	0.5385	F:ADP binding; P:defense response		6	0	4.50125	6.26895	44.0079	3.27056e-11	1.27382e-09
qs_c23174	protein	529	1.15247e-24	0.5815	-		6	0	4.50125	6.26895	44.0079	3.27056e-11	1.27382e-09
qs_c23191	s-adenosylmethionine synthetase	514	4.25574e-73	0.8445	C:cell wall; ; C:nucleolus; F:transferase activity; F:binding; P:response to stress; P:response to abiotic stimulus; P:nucleobase-containing compound metabolic process; P:biosynthetic process; P:metabolic process; P:cellular process; F:nucleotide binding; P:secondary metabolic process; C:cytoplasm; C:plasma membrane	EC:2.5.1.6	6	0	4.50125	6.26895	44.0079	3.27056e-11	1.27382e-09
qs_c23317	probable glutathione s-transferase	494	6.12776e-28	0.9095	F:transferase activity; F:catalytic activity	EC:2.5.1.18; EC:4.4.1.5	6	0	4.50125	6.26895	44.0079	3.27056e-11	1.27382e-09
qs_c23364	predicted protein	501	7.06275e-44	0.6995	F:molecular_function; P:biological_process		6	0	4.50125	6.26895	44.0079	3.27056e-11	1.27382e-09
qs_c23988	myosin heavy chain-related protein	496	7.88819e-21	0.8745	P:transport; P:cellular process; C:intracellular; P:biosynthetic process; P:carbohydrate metabolic process	-	5	0	4.50125	6.26895	44.0079	3.27056e-11	1.27382e-09
qs_c25160	f-box lrr-repeat protein at5g63520-like	485	3.0656e-39	0.684	F:molecular_function; P:biological_process		5	0	4.50125	6.26895	44.0079	3.27056e-11	1.27382e-09
qs_c22740	protein	607	2.45207e-20	0.7046	-		16	1	4.4967	7.17227	74.0462	7.63089e-18	7.97856e-16
qs_c9243	omega-hydroxypalmitate o-feruloyl transferase-like	454	2.73135e-52	0.6075	F:transferase activity; C:nucleus	EC:2.3.1.0	7	0	4.4967	7.17227	74.0462	7.63089e-18	7.97856e-16
qs_c14570	hypothetical protein PRUPE_ppa014545mg	447	6.85262e-22	0.8715	F:molecular_function; P:biological_process; C:cellular_component		12	1	4.49053	8.28224	125.401	4.15924e-29	1.53437e-26
qs_c13598	5-formyltetrahydrofolate cycloligase	475	2.89405e-25	0.862	F:molecular_function; F:binding; F:catalytic activity; P:biosynthetic process; P:cellular process; F:nucleotide binding; P:metabolic process; C:extracellular region; C:mitochondrion	EC:6.3.3.2	5	0	4.47096	6.24198	43.0391	5.36565e-11	2.01748e-09
qs_c13784	calmodulin-binding transcription activator	456	1.23637e-60	0.681	F:binding;	-	5	0	4.47096	6.24198	43.0391	5.36565e-11	2.01748e-09
qs_c17391	phytoene desaturase	492	4.39609e-86	0.9685	C:plastid; P:biosynthetic process; P:cellular process; P:secondary metabolic process; P:lipid metabolic process; F:catalytic activity; P:metabolic process	-	5	0	4.47096	6.24198	43.0391	5.36565e-11	2.01748e-09
qs_c17652	---NA---	214			-		6	0	4.47096	6.24198	43.0391	5.36565e-11	2.01748e-09
qs_c17898	unknown	472	5.84395e-22	0.801	C:Golgi apparatus	-	5	0	4.47096	6.24198	43.0391	5.36565e-11	2.01748e-09
qs_c14469	forkhead-associated domain-containing protein	637	4.46367e-60	0.844	P:reproduction; P:cell differentiation; P:multicellular organismal development; P:DNA metabolic process; P:regulation of gene expression, epigenetic; P:cellular component organization; ; P:response to abiotic stimulus; P:tropism; P:post-embryonic development; P:embryo development; P:cellular process	-	16	1	4.44946	7.12877	71.7003	2.505e-17	2.40087e-15
qs_c123182	nadh kinase-like	478	2.36496e-49	0.846	P:metabolic process; P:cellular process; F:kinase activity; P:nucleobase-containing compound metabolic process; P:biosynthetic process; P:secondary metabolic process; C:cytosol	EC:2.7.1.86; EC:2.7.1.23	5	0	4.44001	6.2145	42.0665	8.82217e-11	3.17663e-09
qs_c13376	upstream activation factor subunit uaf30	494	5.72978e-08	0.84	F:DNA binding	-	5	0	4.44001	6.2145	42.0665	8.82217e-11	3.17663e-09
qs_c13478	histidine kinase 3-like	486	9.69002e-41	0.9505	P:multicellular organismal development; P:biological_process; P:response to stress; P:response to abiotic stimulus; P:signal transduction; F:protein binding; P:post-embryonic development; P:response to extracellular stimulus; P:cell communication; P:response to endogenous stimulus; P:cellular protein modification process; F:receptor activity; P:response to biotic stimulus; P:transport; P:cellular…	EC:3.1.3.16	5	0	4.44001	6.2145	42.0665	8.82217e-11	3.17663e-09
qs_c15967	atp-dependent zinc metalloprotease ftsh chloroplastic-like	511	2.58797e-28	0.83	F:binding; C:membrane; C:plastid; P:protein metabolic process; P:catabolic process; P:cellular process; F:hydrolase activity; F:nucleotide binding	EC:3.4.24.0	6	0	4.44001	6.2145	42.0665	8.82217e-11	3.17663e-09
qs_c16019	protein farnesyltransferase geranylgeranyltransferase type-1 subunit alpha	494	7.37158e-45	0.618	P:cellular process; F:transferase activity	-	6	0	4.44001	6.2145	42.0665	8.82217e-11	3.17663e-09
qs_c16348	udp-n-acetylglucosamine udp-glucose gdp-mannose transporter	526	7.33622e-46	0.919	P:transport; C:membrane	-	6	0	4.44001	6.2145	42.0665	8.82217e-11	3.17663e-09
qs_c16613	uncharacterized partial	532	1.10899e-31	0.861	P:carbohydrate metabolic process; P:cellular process; P:catabolic process; C:mitochondrion	-	6	0	4.44001	6.2145	42.0665	8.82217e-11	3.17663e-09
qs_c18613	transcription factor hy5-like protein	627	1.21727e-46	0.767	P:response to abiotic stimulus; ; F:DNA binding; P:biological_process; F:protein binding; P:signal transduction; P:response to stress; P:response to biotic stimulus; F:sequence-specific DNA binding transcription factor activity	-	9	0	4.44001	6.2145	42.0665	8.82217e-11	3.17663e-09
qs_rep_c44517	delta 1-pyrroline-5-carboxylate synthetase	685	2.80392e-124	0.93	P:response to stress; P:metabolic process; P:multicellular organismal development; P:response to abiotic stimulus; F:nucleotide binding; F:catalytic activity; P:response to endogenous stimulus; P:biosynthetic process; ; P:cellular process; F:kinase activity; C:plastid; C:membrane; P:reproduction; P:post-embryonic development; P:embryo development	EC:1.2.1.41; EC:2.7.2.11	14	0	4.44001	6.2145	42.0665	8.82217e-11	3.17663e-09
qs_c13204	protein	739	4.51209e-67	0.7945	C:plasma membrane	-	8	0	4.42253	5.37204	23.9049	1.01212e-06	1.49014e-05
qs_c14030	PREDICTED: uncharacterized protein LOC100244479	769	6.75561e-69	0.7935	P:nucleobase-containing compound metabolic process; P:anatomical structure morphogenesis; P:multicellular organismal development; P:cell differentiation	-	8	0	4.42253	5.37204	23.9049	1.01212e-06	1.49014e-05
qs_c22462	---NA---	523			-		11	0	4.42253	5.37204	23.9049	1.01212e-06	1.49014e-05
qs_c7095	transcription regulator	524	8.56637e-34	0.726	-		9	0	4.41709	7.09902	70.1224	5.57365e-17	5.16474e-15
qs_c7489	protein	524	2.04017e-26	0.807	P:DNA metabolic process; P:protein metabolic process; P:cellular process; P:response to stress; F:DNA binding; F:nuclease activity; P:cellular protein modification process; F:catalytic activity	EC:5.2.1.8	9	0	4.41709	7.09902	70.1224	5.57365e-17	5.16474e-15
qs_rep_c48684	phosphoenolpyruvate carboxylase	488	3.55492e-90	0.9735	P:generation of precursor metabolites and energy; P:catabolic process; F:catalytic activity; P:metabolic process	EC:4.1.1.31	8	0	4.40904	7.64334	92.4922	6.75907e-22	1.1695e-19
qs_rep_c54435	allene oxide synthase	501	3.45117e-57	0.824	F:catalytic activity; P:cellular process; P:lipid metabolic process; P:response to endogenous stimulus; P:metabolic process; P:response to biotic stimulus; C:mitochondrion; P:response to external stimulus; P:response to stress; C:plastid; F:molecular_function; C:membrane; C:thylakoid; F:binding	EC:4.2.1.92	11	0	4.40904	7.64334	92.4922	6.75907e-22	1.1695e-19
qs_c13213	wd repeat-containing	495	4.88628e-32	0.6875	P:reproduction; P:anatomical structure morphogenesis; P:post-embryonic development; P:embryo development; F:protein binding	-	6	0	4.40839	6.18648	41.0901	1.45373e-10	5.01295e-09
qs_c13547	vacuolar atp synthase subunit f	549	1.02704e-70	0.9515	P:transport; P:cellular process; C:vacuole; C:plasma membrane; F:hydrolase activity; F:transporter activity; C:membrane	-	6	0	4.40839	6.18648	41.0901	1.45373e-10	5.01295e-09
qs_c13690	mitochondrial import inner membrane translocase subunit tim10-like	514	1.59925e-41	0.9395	F:protein binding; F:transporter activity; C:membrane; C:mitochondrion; F:binding; P:transport; P:cellular component organization; P:cellular process	-	6	0	4.40839	6.18648	41.0901	1.45373e-10	5.01295e-09
qs_c6371	folylpolyglutamate synthase-like	528	1.07599e-54	0.823	P:biosynthetic process; P:cellular process; F:catalytic activity; P:metabolic process; ; F:nucleotide binding; C:mitochondrion; P:reproduction; P:post-embryonic development; P:embryo development	EC:6.3.2.17; EC:6.3.2.12	13	1	4.39713	7.84497	101.501	7.14348e-24	1.61373e-21
qs_rep_c53025	universal stress protein family protein	172	7.73333e-08	0.812	P:transport; P:cellular process; P:response to stress; P:response to abiotic stimulus; C:intracellular; C:plasma membrane; P:response to biotic stimulus	-	13	0	4.39713	7.84497	101.501	7.14348e-24	1.61373e-21
qs_c64715	rna polymerase sigma factor rpod-like	438	3.8308e-48	0.7345	; F:DNA binding; F:sequence-specific DNA binding transcription factor activity; F:transcription regulator activity; P:cellular component organization; P:response to abiotic stimulus	-	5	0	4.37606	6.15791	40.1098	2.40078e-10	8.09312e-09
qs_c65558	nodulation protein h-like	404	2.98422e-21	0.6805	F:sulfotransferase activity; P:oxidation-reduction process; F:heme oxygenase (decyclizing) activity; P:heme oxidation; C:cellular_component		5	0	4.37606	6.15791	40.1098	2.40078e-10	8.09312e-09
qs_rep_c125770	nucleotide binding	375	9.29603e-18	0.8895	C:intracellular; F:nucleotide binding	-	10	0	4.37539	7.61209	90.4794	1.86913e-21	2.99551e-19
qs_c8416	phosphoribosylamine--glycine ligase	320	1.48994e-08	0.866	P:nucleobase-containing compound metabolic process; P:biosynthetic process; F:binding; F:nucleotide binding; F:catalytic activity; C:plastid	EC:6.3.4.13	8	0	4.36712	7.05322	67.7346	1.87053e-16	1.61113e-14
qs_rep_c44843	thioredoxin h2-like	479	1.20826e-20	0.85	F:catalytic activity; C:plasma membrane; F:molecular_function; P:cellular homeostasis; P:metabolic process; C:cytosol; P:cellular process	EC:1.8.4.0	8	0	4.364	7.60152	89.8043	2.62924e-21	4.06314e-19
qs_rep_c53818	dynamin-related protein 3a-like	524	1.78081e-30	0.8915	C:cytosol; P:cellular component organization; P:cellular process; C:peroxisome; C:mitochondrion; C:plastid; F:lipid binding; P:nucleobase-containing compound metabolic process; P:catabolic process; P:post-embryonic development; F:hydrolase activity; P:anatomical structure morphogenesis; F:nucleotide binding; C:plasma membrane	-	11	0	4.364	7.60152	89.8043	2.62924e-21	4.06314e-19
qs_c32595	golgi snare 12 protein	799	1.93818e-114	0.903	C:cytosol; C:membrane; P:biosynthetic process; P:carbohydrate metabolic process; P:cellular process; C:Golgi apparatus; F:protein binding; P:transport; P:response to endogenous stimulus; P:cellular component organization; C:vacuole	-	10	0	4.36146	5.32141	22.793	1.8042e-06	2.45141e-05
qs_c7717	isochorismate synthase	281	0.000353562	0.8325	P:cellular process; P:response to stress; P:response to biotic stimulus; C:plastid; F:catalytic activity; P:biosynthetic process	EC:5.4.4.2	8	0	4.35007	7.03762	66.933	2.80894e-16	2.38784e-14
qs_c60773	guanine nucleotide-binding protein subunit beta-2-like	306	2.04654e-10	0.964	P:post-embryonic development; F:signal transducer activity; P:response to endogenous stimulus; P:signal transduction; P:reproduction; C:intracellular; P:anatomical structure morphogenesis; P:multicellular organismal development; C:plasma membrane; F:protein binding; P:response to stress; P:response to biotic stimulus; C:endoplasmic reticulum	-	5	0	4.34299	6.12877	39.1258	3.97357e-10	1.29267e-08
qs_c60896	regulator of ribonuclease-like protein	181	2.06998e-19	0.8285	P:nucleobase-containing compound metabolic process; P:metabolic process; P:cellular process; F:enzyme regulator activity; F:transferase activity	EC:2.1.1.0	5	0	4.34299	6.12877	39.1258	3.97357e-10	1.29267e-08
qs_c61265	let1 like protein	265	1.5329e-19	0.751	C:membrane	-	5	0	4.34299	6.12877	39.1258	3.97357e-10	1.29267e-08
qs_c61634	hat family dimerisation domain containing protein	443	2.4554e-28	0.7165	F:nucleic acid binding	-	5	0	4.34299	6.12877	39.1258	3.97357e-10	1.29267e-08
qs_c62311	---NA---	249			-		5	0	4.34299	6.12877	39.1258	3.97357e-10	1.29267e-08
qs_c62833	heat stress transcription factor a-4a-like	439	6.88383e-27	0.642	C:intracellular; F:DNA binding; P:biological_process; P:cellular process; P:metabolic process; P:response to stress	-	5	0	4.34299	6.12877	39.1258	3.97357e-10	1.29267e-08
qs_rep_c55764	aspartyl aminopeptidase	447	1.15323e-34	0.965	P:biological_process; C:cytoplasm; F:hydrolase activity; P:protein metabolic process; P:catabolic process; F:binding; C:plasma membrane	EC:3.4.11.0	9	0	4.31813	7.77145	96.4717	9.05274e-23	1.73529e-20
qs_c17185	leucine-rich repeat-containing	375	1.30553e-05	0.92	F:hydrolase activity; P:multicellular organismal development	EC:3.1.3.16	5	0	4.30914	6.09902	38.138	6.59128e-10	2.04236e-08
qs_c25100	methionyl-trna formyltransferase-like	438	1.09665e-76	0.892	P:nucleobase-containing compound metabolic process; P:biosynthetic process; P:translation; F:hydrolase activity; F:transferase activity	EC:3.5.1.10; EC:2.1.2.9	5	0	4.30914	6.09902	38.138	6.59128e-10	2.04236e-08
qs_c31687	atp binding microtubule motor family protein	440	2.83613e-17	0.8065	P:cellular process; C:plasma membrane; F:nucleotide binding; F:motor activity; C:cytoskeleton	-	5	0	4.30914	6.09902	38.138	6.59128e-10	2.04236e-08
qs_c56853	trna-specific 2-thiouridylase -like	634	8.33113e-114	0.8685	F:transferase activity; P:metabolic process; P:cellular process; P:nucleobase-containing compound metabolic process; C:mitochondrion	EC:2.1.1.61; EC:2.8.1.0	8	0	4.30914	6.09902	38.138	6.59128e-10	2.04236e-08
qs_c59744	protein	315	4.93517e-23	0.96	F:DNA binding	-	5	0	4.30914	6.09902	38.138	6.59128e-10	2.04236e-08
qs_c59830	protein	394	2.18287e-17	0.7839	P:response to stress; P:response to biotic stimulus	-	5	0	4.30914	6.09902	38.138	6.59128e-10	2.04236e-08
qs_c60157	probable pectinesterase pectinesterase inhibitor 41-like	320	2.59407e-50	0.904	F:hydrolase activity; P:cellular component organization; P:cellular process; P:biological_process; C:cell wall; F:enzyme regulator activity	EC:3.1.1.11	5	0	4.30914	6.09902	38.138	6.59128e-10	2.04236e-08
qs_c60555	u-box domain-containing protein 9-like	379	1.34385e-35	0.704	P:cellular process; C:intracellular	-	5	0	4.30914	6.09902	38.138	6.59128e-10	2.04236e-08
qs_c60604	50s ribosomal protein l31	422	2.32765e-50	0.8095	P:nucleobase-containing compound metabolic process; P:carbohydrate metabolic process; P:catabolic process; P:secondary metabolic process; C:plastid; P:reproduction; P:post-embryonic development; P:embryo development; C:ribosome; P:translation; P:cellular component organization; P:generation of precursor metabolites and energy; P:photosynthesis; P:biosynthetic process; P:cellular process; P:lipid …	-	5	0	4.30914	6.09902	38.138	6.59128e-10	2.04236e-08
qs_c7888	translocation protein sec63	597	8.7158e-56	0.9335	C:membrane; C:endoplasmic reticulum; P:protein metabolic process; P:cellular process; P:signal transduction; P:response to stress; P:response to biotic stimulus; C:Golgi apparatus; C:plasma membrane; F:protein binding; C:cytosol; C:mitochondrion	-	8	0	4.30914	6.09902	38.138	6.59128e-10	2.04236e-08
qs_c22521	protein	477	1.15134e-25	0.655	F:molecular_function		11	1	4.30303	8.10652	111.844	3.86565e-26	1.14517e-23
qs_c123340	uridine-cytidine kinase c-like	481	1.1052e-67	0.8975	C:cytosol; F:kinase activity; F:transferase activity; F:nucleotide binding; P:nucleobase-containing compound metabolic process; P:biosynthetic process; P:response to endogenous stimulus; P:metabolic process; P:cellular process	EC:2.7.1.48; EC:2.7.1.0	5	0	4.29768	5.26895	21.6774	3.22571e-06	4.14655e-05
qs_c13362	myb family transcription factor apl-like	697	1.70654e-16	0.9945	P:multicellular organismal development; C:mitochondrion; F:DNA binding; C:plastid	-	7	0	4.29768	5.26895	21.6774	3.22571e-06	4.14655e-05
qs_c13515	transcription factor bhlh33	748	2.28843e-50	0.8285	F:catalytic activity; P:metabolic process	EC:1.3.1.74	7	0	4.29768	5.26895	21.6774	3.22571e-06	4.14655e-05
qs_c20553	alpha- -mannosyl-glycoprotein 2-beta-n-acetylglucosaminyltransferase-like	473	2.38172e-92	0.928	-		10	0	4.29768	5.26895	21.6774	3.22571e-06	4.14655e-05
qs_c4265	dna (cytosine-5)-methyltransferase cmt3-like	1293	1.2094e-81	0.7205	F:DNA binding; P:regulation of gene expression, epigenetic; P:DNA metabolic process; F:transferase activity; C:nucleus	EC:2.1.1.37	27	1	4.29768	5.26895	21.6774	3.22571e-06	4.14655e-05
qs_rep_c52912	hypothetical protein OsI_19625	517	7.21433e-09	0.554	C:membrane; C:mitochondrion		11	0	4.28162	7.52529	85.0191	2.95503e-20	4.04033e-18
qs_c18314	probable receptor-like protein kinase at1g67000-like	526	9.72268e-16	0.5695	F:transferase activity	-	12	1	4.27694	7.73323	93.9125	3.29779e-22	5.86166e-20
qs_c123224	dolichol phosphate-mannose biosynthesis regulatory	408	4.51023e-09	0.8465	C:membrane; C:endoplasmic reticulum; P:biosynthetic process; F:transferase activity; C:intracellular	-	5	0	4.27448	6.06865	37.1465	1.09577e-09	3.29102e-08
qs_c14172	g protein alpha subunit	442	1.16752e-09	0.8285	P:cellular protein modification process; F:binding; F:nucleotide binding; F:signal transducer activity; P:signal transduction	-	5	0	4.27448	6.06865	37.1465	1.09577e-09	3.29102e-08
qs_c16126	iaa-amino acid hydrolase ilr1-like 5-like	405	2.13502e-28	0.6415	F:hydrolase activity; P:protein metabolic process; P:catabolic process; P:metabolic process; P:cellular process	-	5	0	4.27448	6.06865	37.1465	1.09577e-09	3.29102e-08
qs_c16464	ubiquitin carboxyl-terminal hydrolase 22-like	342	5.64679e-10	0.9464	P:protein metabolic process; P:catabolic process; P:cellular process; F:hydrolase activity; F:binding	EC:3.1.2.15	5	0	4.27448	6.06865	37.1465	1.09577e-09	3.29102e-08
qs_c61214	dna helicase	513	1.69608e-13	0.65	P:DNA metabolic process; F:binding; F:hydrolase activity; P:response to stress	-	5	0	4.23897	6.03762	36.1514	1.82572e-09	5.151e-08
qs_c61466	hypothetical protein VITISV_041876	524	1.77711e-33	0.704	P:metabolic process; F:hydrolase activity; F:binding	EC:3.2.1.0	5	0	4.23897	6.03762	36.1514	1.82572e-09	5.151e-08
qs_c64003	abc transporter g family member 11-like	504	1.33557e-52	0.8205	F:hydrolase activity; F:transporter activity; P:nucleobase-containing compound metabolic process; P:catabolic process; F:nucleotide binding; C:membrane	EC:3.6.3.28	5	0	4.23897	6.03762	36.1514	1.82572e-09	5.151e-08
qs_c69479	dead-box atp-dependent rna helicase 53-like	513	2.11995e-09	0.6579	F:nucleic acid binding; P:response to abiotic stimulus; C:cell; F:hydrolase activity; P:response to stress	-	5	0	4.23897	6.03762	36.1514	1.82572e-09	5.151e-08
qs_rep_c55984	rrna intron-encoded homing endonuclease	344	2.06219e-23	0.8269	F:endonuclease activity		10	0	4.23454	7.69397	91.3228	1.22044e-21	2.00521e-19
qs_rep_c36214	protein kinase 2b	1189	1.62451e-18	0.6855	C:plasma membrane; P:metabolic process; P:cellular process; F:kinase activity; C:plastid; C:nucleus	-	25	1	4.23095	5.2145	20.5583	5.78424e-06	6.96388e-05
qs_c24753	pentatricopeptide repeat-containing	541	1.2567e-05	0.644	-		5	0	4.20256	6.00591	35.1525	3.04865e-09	8.30184e-08
qs_c25312	cytochrome c biogenesis fc	534	1.48016e-36	0.8165	P:cellular component organization; P:cellular process; C:cytoplasm; C:membrane; C:mitochondrion	-	5	0	4.20256	6.00591	35.1525	3.04865e-09	8.30184e-08
qs_c28079	mad3 bub1 homology region 1	498	1.13446e-24	0.754	F:molecular_function; P:biological_process		5	0	4.20256	6.00591	35.1525	3.04865e-09	8.30184e-08
qs_c30383	hypothetical protein PRUPE_ppa1027183mg	515	1.75125e-16	0.6579	F:molecular_function; P:biological_process; C:cellular_component		5	0	4.20256	6.00591	35.1525	3.04865e-09	8.30184e-08
qs_c30482	dna repair and recombination protein rad54-like	513	7.20585e-69	0.796	P:cell-cell signaling; P:cellular component organization; P:cellular protein modification process; P:post-embryonic development; P:cellular process; P:response to stress; P:response to biotic stimulus; P:regulation of gene expression, epigenetic; ; F:hydrolase activity; P:DNA metabolic process; F:DNA binding; P:nucleobase-containing compound metabolic process; F:nucleotide binding; P:biosynthetic…	-	5	0	4.20256	6.00591	35.1525	3.04865e-09	8.30184e-08
qs_c60342	protein	498	8.70243e-86	0.891	F:receptor activity; F:kinase activity; F:carbohydrate binding; P:cellular protein modification process; F:nucleotide binding	EC:2.7.10.2; EC:2.7.11.0	5	0	4.20256	6.00591	35.1525	3.04865e-09	8.30184e-08
qs_c60609	polyphosphoinositide phosphatase-like	442	9.52576e-13	0.5915	P:inositol phosphate dephosphorylation; P:inositol trisphosphate metabolic process; F:phosphatidylinositol-4,5-bisphosphate 5-phosphatase activity; F:phosphoric ester hydrolase activity		5	0	4.20256	6.00591	35.1525	3.04865e-09	8.30184e-08
qs_rep_c51078	harpin-induced protein	188	1.45765e-16	0.906	P:response to stress; P:response to biotic stimulus; C:plasma membrane; P:biosynthetic process; P:carbohydrate metabolic process; P:cellular process	-	10	0	4.19086	7.65361	88.7021	4.58979e-21	6.95655e-19
qs_c18927	cytochrome p450	603	1.66386e-65	0.811	F:binding; F:catalytic activity; F:molecular_function; P:metabolic process	-	14	1	4.18683	6.8891	59.5897	1.16844e-14	8.04415e-13
qs_rep_c49585	7-dehydrocholesterol reductase	475	4.98001e-70	0.961	P:biosynthetic process; P:cellular process; P:lipid metabolic process; C:membrane; C:endoplasmic reticulum; C:Golgi apparatus; F:catalytic activity; C:plasma membrane; F:protein binding; P:metabolic process	EC:1.3.1.0	7	0	4.16829	7.42095	78.7098	7.19369e-19	8.79069e-17
qs_rep_c49748	ras gtpase-activating protein-binding protein	229	1.38709e-13	0.72	F:binding	-	9	0	4.16829	7.42095	78.7098	7.19369e-19	8.79069e-17
qs_c24154	protein	531	1.22664e-46	0.7415	-		5	0	4.1652	5.97349	34.1501	5.10201e-09	1.30911e-07
qs_c126967	dna-directed rna polymerase chloroplastic mitochondrial-like	826	7.40239e-175	0.9275	F:transferase activity; C:mitochondrion; F:DNA binding; P:flower development; P:pollination; P:anatomical structure morphogenesis; P:cellular component organization; P:cell differentiation; P:cell growth; P:multicellular organismal development; ; C:plastid; P:reproduction; P:post-embryonic development; P:embryo development	EC:2.7.7.6	9	0	4.16099	5.15791	19.436	1.04026e-05	0.000115959
qs_c127291	---NA---	501			-		9	0	4.16099	5.15791	19.436	1.04026e-05	0.000115959
qs_c16887	s-adenosyl-l-methionine-dependent methyltransferase family protein	1060	1.0549e-121	0.837	F:molecular_function; P:biological_process; C:cellular_component		14	0	4.16099	5.15791	19.436	1.04026e-05	0.000115959
qs_c19347	dehydration-responsive element-binding protein 3-like	1003	1.42666e-63	0.72		-	14	0	4.16099	5.15791	19.436	1.04026e-05	0.000115959
qs_c2695	tryptophan synthase beta chain chloroplastic-like	1642	5.62992e-169	0.8225	F:catalytic activity; F:binding; C:plastid; P:biosynthetic process; ; P:metabolic process	EC:4.2.1.20; EC:1.3.1.74	39	2	4.16099	5.15791	19.436	1.04026e-05	0.000115959
qs_c58388	receptor-like protein kinase	919	1.64911e-82	0.7005	P:metabolic process; P:cellular process; F:kinase activity; F:nucleotide binding	-	8	0	4.16099	5.15791	19.436	1.04026e-05	0.000115959
qs_rep_c46839	cysteine proteinase rd21a-like	463	1.13581e-83	0.8785	C:vacuole; F:catalytic activity; C:plastid; P:protein metabolic process; P:catabolic process; C:extracellular region; P:response to stress; P:response to abiotic stimulus; F:hydrolase activity; P:metabolic process	EC:1.3.1.74	7	0	4.15513	7.40888	77.9976	1.03163e-18	1.21509e-16
qs_rep_c127183	gtpase obg-like	311	4.04786e-19	0.87	C:mitochondrion; P:nucleobase-containing compound metabolic process; P:catabolic process; F:binding; F:hydrolase activity; F:nucleotide binding	-	9	0	4.14185	7.3967	77.2832	1.4812e-18	1.70356e-16
qs_rep_c44414	heat shock protein 83-like	485	3.94862e-58	0.906	C:cytosol; C:cell wall; P:protein metabolic process; P:cellular process; P:response to stress; P:response to abiotic stimulus; F:nucleotide binding; F:protein binding; P:biological_process; P:response to biotic stimulus; C:plasma membrane	-	7	0	4.12844	7.38442	76.5665	2.12922e-18	2.36537e-16
qs_c69862	sugar transport protein 14-like	303	1.81904e-26	0.845	C:plasma membrane; P:transport; F:transporter activity; P:cellular process; F:catalytic activity; C:membrane; P:metabolic process	EC:1.3.1.74	7	0	4.12803	6.83599	57.0898	4.16358e-14	2.65167e-12
qs_c57197	aarf domain-containing kinase	557	9.08516e-49	0.7475	F:nucleotide binding; P:cellular protein modification process; F:kinase activity; F:transporter activity	-	7	0	4.12686	5.94032	33.1442	8.5572e-09	2.10718e-07
qs_c57480	ap-3 complex subunit delta-like	628	1.62421e-41	0.6971	C:cytoplasm; P:transport	-	7	0	4.12686	5.94032	33.1442	8.5572e-09	2.10718e-07
qs_c57885	protein srg1	638	9.09905e-45	0.7465	F:catalytic activity; P:metabolic process	EC:1.14.11.0	7	0	4.12686	5.94032	33.1442	8.5572e-09	2.10718e-07
qs_c58263	serine carboxypeptidase-like 45-like	655	5.86444e-121	0.8925	C:plasma membrane; C:cell wall; F:hydrolase activity; P:protein metabolic process; P:catabolic process	EC:3.4.16.0	7	0	4.12686	5.94032	33.1442	8.5572e-09	2.10718e-07
qs_rep_c51698	pentatricopeptide repeat-containing protein mitochondrial-like	756	1.30332e-96	0.8165	C:mitochondrion	-	11	0	4.12686	5.94032	33.1442	8.5572e-09	2.10718e-07
qs_c2085	ribosomal protein l14	608	6.89878e-67	0.994	F:structural molecule activity; C:ribosome; C:plastid; P:translation; F:RNA binding	-	21	2	4.08746	7.74288	90.3155	2.03053e-21	3.20169e-19
qs_rep_c42651	probable e3 ubiquitin-protein ligase xbos32-like	460	7.24024e-31	0.8125	F:receptor activity; P:protein metabolic process; F:kinase activity; P:metabolic process; P:cellular process; F:binding	-	7	0	4.08746	7.34695	74.4026	6.37035e-18	6.80618e-16
qs_rep_c54409	zinc finger protein zat10-like	353	5.42418e-21	0.7145	P:response to external stimulus; P:response to stress; P:response to biotic stimulus; F:binding; P:response to abiotic stimulus; P:metabolic process; P:response to endogenous stimulus; P:signal transduction; P:biological_process; P:photosynthesis; ; F:DNA binding; P:biosynthetic process; P:cellular process; P:lipid metabolic process; F:sequence-specific DNA binding transcription factor activity; …	-	10	0	4.08746	7.34695	74.4026	6.37035e-18	6.80618e-16
qs_c68674	auxin-induced protein 5ng4-like	262	1.96621e-08	0.7088	C:membrane		7	0	4.08746	6.79946	55.4086	9.79067e-14	5.9821e-12
qs_c9168	nbs-containing resistance-like protein	443	5.84894e-30	0.727	F:hydrolase activity; F:binding	-	6	0	4.08746	6.79946	55.4086	9.79067e-14	5.9821e-12
qs_rep_c38036	2-hydroxy-6-oxononadienedioate 2-hydroxy-6-oxononatrienedioate hydrolase-like	620	4.53465e-31	0.738	C:plastid; F:hydrolase activity; P:nucleobase-containing compound metabolic process	-	13	0	4.08746	6.79946	55.4086	9.79067e-14	5.9821e-12
qs_c123181	kinase-like protein	509	8.92732e-32	0.8235	F:receptor activity; P:cellular protein modification process; F:nucleotide binding; F:catalytic activity; C:membrane; F:kinase activity; P:metabolic process	EC:1.3.1.74; EC:2.7.11.0	5	0	4.08746	5.90638	32.1348	1.43838e-08	3.32427e-07
qs_c13486	cystinosin homolog	511	1.28126e-49	0.778	C:membrane; C:vacuole; C:plasma membrane	-	5	0	4.08746	5.90638	32.1348	1.43838e-08	3.32427e-07
qs_c13573	tetrahydrofolate dehydrogenase cyclohydrolase	523	2.18454e-52	0.872	P:biosynthetic process; P:cellular process; F:catalytic activity; F:hydrolase activity; C:plastid; F:nucleotide binding; P:metabolic process	EC:1.5.1.5; EC:3.5.4.9	5	0	4.08746	5.90638	32.1348	1.43838e-08	3.32427e-07
qs_c14017	protein	508	2.97326e-14	0.7615	P:transport; P:cellular process; P:cellular component organization; F:protein binding; C:Golgi apparatus; C:membrane	-	5	0	4.08746	5.90638	32.1348	1.43838e-08	3.32427e-07
qs_c14185	protein kinase	505	8.74284e-08	0.565	P:metabolic process; P:cellular process; F:transferase activity	-	5	0	4.08746	5.90638	32.1348	1.43838e-08	3.32427e-07
qs_c16321	cytochrome p450	547	9.90905e-71	0.898	F:binding; F:catalytic activity; F:molecular_function; P:metabolic process	EC:1.3.3.9	5	0	4.08746	5.90638	32.1348	1.43838e-08	3.32427e-07
qs_c16331	probable s-acyltransferase at2g14255-like	496	9.06859e-55	0.7945	C:membrane; F:catalytic activity; P:metabolic process; F:binding; F:transferase activity	EC:1.3.1.74	5	0	4.08746	5.90638	32.1348	1.43838e-08	3.32427e-07
qs_c16754	phosphorylase family protein	525	1.53665e-63	0.7855	F:molecular_function; C:cell wall; P:response to external stimulus; P:response to stress; C:cytoplasm; P:nucleobase-containing compound metabolic process; F:catalytic activity	-	5	0	4.08746	5.90638	32.1348	1.43838e-08	3.32427e-07
qs_c23875	alcohol acyl transferase	638	1.96837e-79	0.7655	F:transferase activity	-	7	0	4.08746	5.90638	32.1348	1.43838e-08	3.32427e-07
qs_c25497	voltage-gated hydrogen channel 1-like	630	2.65142e-37	0.8081	P:anatomical structure morphogenesis; P:multicellular organismal development; P:biosynthetic process; P:carbohydrate metabolic process; P:cellular process	-	7	0	4.08746	5.90638	32.1348	1.43838e-08	3.32427e-07
qs_c65298	probable pectinesterase pectinesterase inhibitor 40-like	453	1.52296e-09	0.8775	P:response to biotic stimulus; C:cell wall; P:cellular component organization; P:cellular process; C:cytoplasm; C:plasma membrane; F:hydrolase activity; F:enzyme regulator activity; P:biological_process; C:extracellular region	EC:3.1.1.11	4	0	4.08746	5.90638	32.1348	1.43838e-08	3.32427e-07
qs_c8779	at1g56180 f14g9_20	486	1.49989e-80	0.8975	C:plastid	-	6	0	4.06674	6.78084	54.5636	1.50495e-13	8.67989e-12
qs_rep_c39877	rna recognition motif-containing protein	487	5.10094e-32	0.8115	C:nucleolus; P:response to stress; P:response to abiotic stimulus; F:RNA binding; F:binding; F:nucleotide binding	-	7	0	4.05948	7.32141	72.9486	1.33072e-17	1.33427e-15
qs_c30688	peptidase acyl-coenzyme a 6-aminopenicillanic acid acyl-transferase	467	7.58228e-49	0.8415	P:biosynthetic process; P:cellular process	-	4	0	4.04696	5.87161	31.122	2.42307e-08	5.43925e-07
qs_c31408	agamous-like mads-box protein agl15-like	463	1.25869e-36	0.764	F:sequence-specific DNA binding transcription factor activity; F:DNA binding; F:protein binding; C:nucleus;	-	4	0	4.04696	5.87161	31.122	2.42307e-08	5.43925e-07
qs_c31964	50s ribosomal protein chloroplastic-like	446	9.85022e-79	0.9115	P:nucleobase-containing compound metabolic process; P:carbohydrate metabolic process; P:catabolic process; P:secondary metabolic process; C:plastid; C:membrane; P:reproduction; P:post-embryonic development; P:embryo development; P:translation; P:cellular component organization; P:generation of precursor metabolites and energy; P:photosynthesis; P:biosynthetic process; P:cellular process; P:lipid …	-	4	0	4.04696	5.87161	31.122	2.42307e-08	5.43925e-07
qs_c59916	protein	463	2.85145e-10	0.6195	F:binding; P:metabolic process; F:kinase activity; P:cellular process	-	4	0	4.04696	5.87161	31.122	2.42307e-08	5.43925e-07
qs_c63487	pentatricopeptide repeat-containing protein chloroplastic-like	451	2.33166e-75	0.8545	P:biosynthetic process; P:cellular process; P:reproduction; P:post-embryonic development; P:embryo development; P:cellular component organization; C:plastid; P:flower development	-	4	0	4.04696	5.87161	31.122	2.42307e-08	5.43925e-07
qs_c7113	receptor-like protein 12-like	514	9.94185e-16	0.627	F:kinase activity; P:oxidation-reduction process; F:oxidoreductase activity; P:phosphorylation; F:2-alkenal reductase [NAD(P)] activity; F:receptor activity		8	0	4.04572	6.76199	53.7157	2.31701e-13	1.32462e-11
qs_c75393	cytochrome c-type biogenesis	463	5.55111e-49	0.962	P:embryo development; C:cellular_component; C:membrane; C:mitochondrion; F:catalytic activity; P:metabolic process	-	6	0	4.04572	6.76199	53.7157	2.31701e-13	1.32462e-11
qs_rep_c39858	probable sugar phosphate phosphate translocator at1g06470-like	478	3.64983e-58	0.899	P:transport; C:membrane	-	7	0	4.03095	7.29542	71.4852	2.7934e-17	2.66422e-15
qs_c12359	---NA---	161			-		8	0	4.00998	5.03762	17.1833	3.39401e-05	0.000331633
qs_c13525	sugar transport protein 7-like	720	9.40983e-107	0.869	C:plasma membrane; P:transport; P:cellular process; F:transporter activity; F:catalytic activity; C:membrane; P:metabolic process	EC:1.3.1.74	6	0	4.00998	5.03762	17.1833	3.39401e-05	0.000331633
qs_c14153	#NAME?	698	3.82792e-90	0.9325	F:catalytic activity; P:biological_process; P:generation of precursor metabolites and energy; P:carbohydrate metabolic process; P:catabolic process; C:plastid	EC:5.4.2.1	6	0	4.00998	5.03762	17.1833	3.39401e-05	0.000331633
qs_c15469	---NA---	446			-		13	0	4.00998	5.03762	17.1833	3.39401e-05	0.000331633
qs_c19683	group ii intron splicing factor crs1-like	793	7.82107e-133	0.8975	F:RNA binding	-	8	0	4.00998	5.03762	17.1833	3.39401e-05	0.000331633
qs_c22814	ubiquitin carboxyl-terminal hydrolase 25-like	1085	8.21852e-168	0.8035	P:protein metabolic process; P:catabolic process; P:cellular process; F:hydrolase activity	EC:3.1.2.15	13	0	4.00998	5.03762	17.1833	3.39401e-05	0.000331633
qs_c5440	flavonoid 3 -monooxygenase-like	1294	0	0.8065	F:binding; F:catalytic activity; F:molecular_function; P:metabolic process	EC:1.14.13.88; EC:1.13.11.0	21	1	4.00998	5.03762	17.1833	3.39401e-05	0.000331633
qs_c58119	pentatricopeptide repeat-containing protein mitochondrial-like	933	1.06056e-158	0.7655	F:DNA binding	-	7	0	4.00998	5.03762	17.1833	3.39401e-05	0.000331633
qs_c11261	major facilitator protein	462	8.6097e-53	0.797	C:membrane	-	4	0	4.00529	5.83599	30.106	4.09072e-08	8.67481e-07
qs_c13142	mitochondrial carrier	474	9.43242e-35	0.8235	C:membrane; C:mitochondrion; P:transport; P:cellular process	-	4	0	4.00529	5.83599	30.106	4.09072e-08	8.67481e-07
qs_c13178	PREDICTED: uncharacterized protein LOC100262248	455	1.10339e-28	0.8055	P:catabolic process; P:cellular process; P:lipid metabolic process; P:transport; P:cellular component organization; C:intracellular	-	4	0	4.00529	5.83599	30.106	4.09072e-08	8.67481e-07
qs_c13832	protein	468	1.49334e-12	0.642	C:membrane; F:transferase activity	-	4	0	4.00529	5.83599	30.106	4.09072e-08	8.67481e-07
qs_c15990	protein argonaute 2-like	569	1.38135e-90	0.8055	P:translation; F:translation factor activity, nucleic acid binding	-	7	0	4.00529	5.83599	30.106	4.09072e-08	8.67481e-07
qs_c16374	zinc finger ccch domain-containing protein 3-like	601	2.02258e-94	0.8115	P:biological_process; F:DNA binding; F:nuclease activity; F:binding;	-	7	0	4.00529	5.83599	30.106	4.09072e-08	8.67481e-07
qs_c17209	pentatricopeptide repeat-containing protein	484	8.33298e-44	0.822	C:membrane; C:thylakoid; C:plastid; F:catalytic activity	-	4	0	4.00529	5.83599	30.106	4.09072e-08	8.67481e-07
qs_c20692	probable signal peptidase complex subunit 1-like	763	3.25273e-43	0.852	F:hydrolase activity; P:protein metabolic process; P:cellular process; C:membrane; C:endoplasmic reticulum	-	11	0	4.00529	5.83599	30.106	4.09072e-08	8.67481e-07
qs_c25318	pentatricopeptide repeat-containing protein mitochondrial-like	466	2.04986e-68	0.7505	P:biological_process		4	0	4.00529	5.83599	30.106	4.09072e-08	8.67481e-07
qs_c30299	cyclin a-like protein	467	3.75766e-72	0.808	P:cell cycle; P:multicellular organismal development; P:cellular process; F:protein binding; P:metabolic process; C:cytoplasm; C:nucleus	-	4	0	4.00529	5.83599	30.106	4.09072e-08	8.67481e-07
qs_c30590	hypothetical protein VITISV_008472	490	2.43433e-37	0.622	F:nucleic acid binding; P:DNA integration; F:RNA binding; P:RNA-dependent DNA replication; F:ribonuclease H activity; F:RNA-directed DNA polymerase activity		4	0	4.00529	5.83599	30.106	4.09072e-08	8.67481e-07
qs_c62062	kinetochore protein ndc80 homolog	436	1.05402e-45	0.726	P:multicellular organismal development; P:biological_process; P:DNA metabolic process; P:cellular component organization; P:cellular process; P:flower development; P:anatomical structure morphogenesis; P:cell cycle; P:metabolic process	-	4	0	4.00529	5.83599	30.106	4.09072e-08	8.67481e-07
qs_c63274	translation initiation factor eif-2b subunit delta-like	377	1.08271e-14	0.953	F:translation factor activity, nucleic acid binding; C:cytoplasm; F:enzyme regulator activity; P:translation; P:biological_process; F:nucleotide binding	-	4	0	4.00529	5.83599	30.106	4.09072e-08	8.67481e-07
qs_c64194	at3g25550 mwl2_17	383	6.68794e-36	0.834	C:cytosol	-	4	0	4.00529	5.83599	30.106	4.09072e-08	8.67481e-07
qs_c64500	leucine-rich repeat receptor protein kinase exs-like	342	1.058e-23	0.7215	P:metabolic process; F:catalytic activity	-	4	0	4.00529	5.83599	30.106	4.09072e-08	8.67481e-07
qs_c65437	probable serine threonine-protein kinase cdc7-like	328	8.43292e-20	0.5605	P:cellular protein modification process; F:kinase activity	EC:2.7.11.0	4	0	4.00529	5.83599	30.106	4.09072e-08	8.67481e-07
qs_c68558	hypothetical protein VITISV_010312	406	1.38121e-08	0.625	-		4	0	4.00529	5.83599	30.106	4.09072e-08	8.67481e-07
qs_rep_c48959	40s ribosomal protein s24-2-like	344	9.79499e-48	0.9745	-		15	0	4.00529	5.83599	30.106	4.09072e-08	8.67481e-07
qs_rep_c54077	cytochrome c oxidase subunit mitochondrial-like isoform 2	413	2.00831e-37	0.8305	C:membrane; C:mitochondrion; F:catalytic activity; F:transporter activity	EC:1.9.3.1	10	0	4.00529	5.83599	30.106	4.09072e-08	8.67481e-07
qs_rep_c39160	cgs1 mrna stability	447	7.47045e-47	0.9295	F:binding; P:biosynthetic process; F:catalytic activity	-	7	0	4.00184	7.26895	70.0126	5.89277e-17	5.40918e-15
qs_rep_c49214	cytochrome p450 84a1-like	502	1.32032e-29	0.931	F:catalytic activity; P:response to abiotic stimulus; F:molecular_function; F:binding; P:biosynthetic process; ; P:secondary metabolic process; C:endoplasmic reticulum; P:metabolic process	-	10	0	4.00184	7.26895	70.0126	5.89277e-17	5.40918e-15
qs_rep_c54885	cellulose synthase a catalytic subunit 6	444	1.30406e-46	0.8915	F:transferase activity; P:biosynthetic process; P:carbohydrate metabolic process; P:cellular process; C:membrane; P:cellular component organization; F:binding	EC:2.4.1.12	9	0	4.00158	7.47984	77.8979	1.08507e-18	1.25534e-16
qs_rep_c38469	4-coumarate:coenzyme a ligase 2	489	7.78239e-18	0.83	P:biosynthetic process; ; P:secondary metabolic process; P:response to external stimulus; P:response to stress; F:nucleotide binding; F:catalytic activity; P:metabolic process; P:response to abiotic stimulus; P:response to biotic stimulus	EC:1.13.12.7; EC:6.2.1.12	7	0	3.98706	7.25553	69.2727	8.57473e-17	7.69051e-15
qs_rep_c37982	haloacid dehalogenase-like hydrolase domain-containing protein	450	3.02856e-66	0.818	F:hydrolase activity; P:biological_process; P:transport	-	7	0	3.97213	7.24198	68.5305	1.24929e-16	1.09045e-14
qs_rep_c44924	early-responsive to dehydration stress-related protein	1087	1.66694e-150	0.928	C:plasma membrane; C:membrane	-	26	0	3.96239	5.79946	29.0867	6.92097e-08	1.43803e-06
qs_c2412	uncharacterized loc101206121	638	2.67474e-45	0.7915	P:biological_process		25	3	3.95563	8.18648	106.317	6.28423e-25	1.68314e-22
qs_rep_c37600	alpha- partial	488	3.66261e-29	0.999	C:cytoskeleton; P:cellular component organization; P:cellular process; P:nucleobase-containing compound metabolic process; P:catabolic process; F:hydrolase activity; F:structural molecule activity; C:cytoplasm; F:nucleotide binding	-	7	0	3.9418	7.2145	67.0391	2.66181e-16	2.27265e-14
qs_c123779	hypothetical protein PRUPE_ppa012685mg	324	3.00669e-05	0.6892	-		4	0	3.91816	5.76199	28.0644	1.17344e-07	2.26039e-06
qs_c13262	transmembrane protein 184a-like	363	4.80167e-22	0.94	C:cytoplasm; C:membrane	-	4	0	3.91816	5.76199	28.0644	1.17344e-07	2.26039e-06
qs_c16782	protein	419	3.40863e-15	0.7845	-		4	0	3.91816	5.76199	28.0644	1.17344e-07	2.26039e-06
qs_c16873	precursor monofunctional aspartokinase	384	1.5521e-40	0.877	P:biosynthetic process; ; F:kinase activity; P:metabolic process; P:cellular process; F:binding; C:plastid	EC:2.7.2.4	4	0	3.91816	5.76199	28.0644	1.17344e-07	2.26039e-06
qs_c17250	phosphate transporter pho1-like	401	7.38252e-51	0.7895	P:biosynthetic process; ; P:secondary metabolic process; P:transport; C:membrane; P:response to external stimulus; P:response to stress; P:response to extracellular stimulus; P:cell communication; F:transporter activity; C:Golgi apparatus; P:biological_process; C:plasma membrane	-	4	0	3.91816	5.76199	28.0644	1.17344e-07	2.26039e-06
qs_c17453	pumilio homolog 2-like	425	1.01645e-31	0.856	F:RNA binding; C:plasma membrane	-	4	0	3.91816	5.76199	28.0644	1.17344e-07	2.26039e-06
qs_c18305	probable pectinesterase 53-like	855	8.42798e-159	0.766	F:hydrolase activity; P:cellular component organization; P:cellular process; C:cell wall	EC:3.1.1.11	15	1	3.91816	5.76199	28.0644	1.17344e-07	2.26039e-06
qs_c19428	tryptophanyl-trna	410	2.21561e-37	0.9195	F:catalytic activity; P:nucleobase-containing compound metabolic process; P:translation; ; F:nucleotide binding; P:anatomical structure morphogenesis; P:multicellular organismal development; C:cytoplasm	EC:6.1.1.2	4	0	3.91816	5.76199	28.0644	1.17344e-07	2.26039e-06
qs_c22116	leucine rich repeat receptor	444	5.08868e-22	0.7385	F:catalytic activity; F:kinase activity; P:metabolic process; P:cellular process; C:membrane	-	4	0	3.91816	5.76199	28.0644	1.17344e-07	2.26039e-06
qs_c22323	lysine-specific histone	771	4.49305e-14	0.4867	P:oxidation-reduction process; F:oxidoreductase activity; P:transcription, DNA-dependent; C:nucleus; F:DNA binding; F:methyltransferase activity; F:L-amino-acid oxidase activity; P:methylation		10	0	3.91816	5.76199	28.0644	1.17344e-07	2.26039e-06
qs_c24806	unnamed protein product	353	0.000209578	0.8	-		4	0	3.91816	5.76199	28.0644	1.17344e-07	2.26039e-06
qs_c24934	pentatricopeptide repeat-containing	309	1.4864e-26	0.733	P:chloroplast RNA processing; C:chloroplast		4	0	3.91816	5.76199	28.0644	1.17344e-07	2.26039e-06
qs_c27410	cysteine-rich receptor-like protein kinase	191	3.61218e-06	0.85	F:receptor activity; P:cellular protein modification process; F:nucleotide binding; F:kinase activity	EC:2.7.11.0	4	0	3.91816	5.76199	28.0644	1.17344e-07	2.26039e-06
qs_c29793	reticuline oxidase-like	287	9.98383e-10	0.764	-		4	0	3.91816	5.76199	28.0644	1.17344e-07	2.26039e-06
qs_c29843	protein kinase family protein	335	1.88878e-47	0.81	C:plasma membrane; F:transferase activity	-	4	0	3.91816	5.76199	28.0644	1.17344e-07	2.26039e-06
qs_c31374	glucan endo- -beta-glucosidase	299	8.19965e-34	0.7365	F:hydrolase activity; P:carbohydrate metabolic process; F:binding	EC:3.2.1.0	4	0	3.91816	5.76199	28.0644	1.17344e-07	2.26039e-06
qs_c59274	trna uridine 5-carboxymethylaminomethyl modification enzyme -like	399	1.62787e-29	0.855	F:nucleotide binding; P:response to stress; P:catabolic process; P:cellular process; F:catalytic activity; F:molecular_function; P:nucleobase-containing compound metabolic process; P:metabolic process	-	4	0	3.91816	5.76199	28.0644	1.17344e-07	2.26039e-06
qs_c69115	f-box lrr-repeat protein 4-like	640	3.23266e-65	0.824	P:protein metabolic process; P:catabolic process; P:cellular process; P:biosynthetic process; P:cellular protein modification process; P:carbohydrate metabolic process; F:catalytic activity	EC:6.3.2.19	6	0	3.91816	5.76199	28.0644	1.17344e-07	2.26039e-06
qs_c76220	low quality protein: proteasome activator complex subunit 4-like	378	2.76512e-42	0.929	C:nucleus	-	6	0	3.91816	5.76199	28.0644	1.17344e-07	2.26039e-06
qs_c79628	conserved hypothetical protein	182	0.0132468	0.88	P:pollen-pistil interaction; P:cellular protein modification process; F:nucleotide binding; F:kinase activity	EC:2.7.11.0	6	0	3.91816	5.76199	28.0644	1.17344e-07	2.26039e-06
qs_c8896	acyltransferase-like protein chloroplastic-like	647	2.44653e-76	0.7755	P:metabolic process; F:transferase activity; C:plastid	EC:2.3.1.0	6	0	3.91816	5.76199	28.0644	1.17344e-07	2.26039e-06
qs_c9514	ribonuclease h protein at1g65750-like	616	5.25269e-25	0.614	F:RNA binding; P:DNA metabolic process; P:biosynthetic process; F:transferase activity; F:hydrolase activity	EC:2.7.7.49	6	0	3.91816	5.76199	28.0644	1.17344e-07	2.26039e-06
qs_c1254	PREDICTED: uncharacterized protein LOC101294764	840	2.49739e-40	0.657	-		28	2	3.91271	6.64334	48.5672	3.19157e-12	1.45798e-10
qs_c18268	early light-inducible protein	571	2.99646e-64	0.7465	P:response to abiotic stimulus	-	12	1	3.91271	6.64334	48.5672	3.19157e-12	1.45798e-10
qs_rep_c53067	multidrug resistance	534	7.39637e-53	0.8715	P:transport; P:cellular process; C:membrane; F:transporter activity	-	9	0	3.91081	7.18648	65.5381	5.70007e-16	4.74246e-14
qs_rep_c48075	f-box and wd40 domain	505	4.60743e-51	0.9315	P:cell growth; F:kinase activity; P:post-embryonic development; P:cell cycle	EC:2.7.11.7	9	0	3.89507	7.17227	64.7841	8.3571e-16	6.86546e-14
qs_rep_c45501	phd and ring finger domain-containing protein	491	1.82158e-25	0.64	F:metal ion binding; F:zinc ion binding		9	0	3.87915	7.15791	64.0277	1.22683e-15	9.91195e-14
qs_rep_c46049	cystathionine gamma-synthase	425	1.99149e-32	0.697	F:binding; F:transferase activity; C:cytoplasm; P:biosynthetic process; ; F:catalytic activity; C:plastid	EC:2.5.1.48	8	0	3.87915	7.15791	64.0277	1.22683e-15	9.91195e-14
qs_rep_c39974	protein kinase family protein	376	1.00813e-08	0.8694	P:response to stress; P:cell death; P:cellular protein modification process; P:response to biotic stimulus; P:signal transduction; F:kinase activity; C:intracellular; F:receptor activity; P:biosynthetic process; ; P:secondary metabolic process; F:nucleotide binding; P:transport; P:cellular process; C:plasma membrane	-	8	0	3.86305	7.14341	63.2689	1.80328e-15	1.43909e-13
qs_rep_c38524	gata transcription factor 9-like	160	2.32045e-08	0.779	; F:DNA binding	-	8	0	3.84677	7.12877	62.5077	2.654e-15	2.06737e-13
qs_c13491	cyclopocyclopropane fatty acid synthase-like protein	1079	5.33861e-42	0.78	F:transferase activity; P:biosynthetic process; P:lipid metabolic process; P:metabolic process; P:cellular process	EC:2.1.1.79	12	0	3.8413	4.90638	14.9229	0.000111995	0.000910493
qs_c17722	integral membrane protein	1012	1.22177e-171	0.7935	C:membrane	-	11	0	3.8413	4.90638	14.9229	0.000111995	0.000910493
qs_c19770	receptor-like kinase	686	4.49176e-62	0.7785	F:receptor activity; C:cell wall; F:catalytic activity; C:plasma membrane; F:kinase activity; P:cellular protein modification process; F:nucleotide binding; C:membrane	-	5	0	3.8413	4.90638	14.9229	0.000111995	0.000910493
qs_c57709	probable receptor-like protein kinase at1g67000-like	877	8.20649e-45	0.5585	F:kinase activity	-	6	0	3.8413	4.90638	14.9229	0.000111995	0.000910493
qs_c57982	peroxidase 17-like	787	5.35634e-150	0.8905	P:multicellular organismal development; P:growth; P:anatomical structure morphogenesis; P:response to stress; F:binding; F:catalytic activity; C:cytosol; P:metabolic process	EC:1.11.1.7	6	0	3.8413	4.90638	14.9229	0.000111995	0.000910493
qs_c59116	condensin complex subunit 2-like	268	9.86588e-05	0.7758	P:cellular component organization; P:cellular process; P:regulation of gene expression, epigenetic; ; P:DNA metabolic process; P:biosynthetic process; P:cell cycle; P:cellular protein modification process; C:cytoplasm; C:intracellular; P:signal transduction; P:flower development; C:nucleus	-	6	0	3.8413	4.90638	14.9229	0.000111995	0.000910493
qs_c60628	pentatricopeptide repeat-containing protein at5g03800-like	820	1.2336e-110	0.716	P:reproduction; P:post-embryonic development; P:embryo development; C:membrane; F:catalytic activity	-	6	0	3.8413	4.90638	14.9229	0.000111995	0.000910493
qs_rep_c36535	non-lysosomal glucosylceramidase-like	508	3.03326e-17	0.6765	P:cellular process; P:lipid metabolic process; F:hydrolase activity; C:membrane	-	30	1	3.8413	4.90638	14.9229	0.000111995	0.000910493
qs_c56339	protein	656	9.43936e-17	0.8212	P:transport; F:binding; P:metabolic process; F:catalytic activity	-	18	2	3.83717	7.51406	75.8765	3.01977e-18	3.33574e-16
qs_rep_c38160	low quality protein: eukaryotic translation initiation factor 5b-like	173	1.75976e-09	0.94	-		8	0	3.83031	7.11397	61.7442	3.91105e-15	2.89654e-13
qs_c15245	nhl repeat-containing protein	821	4.60653e-35	0.8235	F:protein binding; P:metabolic process; P:cell cycle; ; P:nucleobase-containing compound metabolic process	-	14	1	3.82543	5.68398	26.0112	3.39444e-07	5.81157e-06
qs_c25073	cation calcium exchanger 5-like	588	1.97229e-05	0.71	C:membrane	-	6	0	3.82543	5.68398	26.0112	3.39444e-07	5.81157e-06
qs_c25434	protein odorant1-like	621	1.37192e-50	0.798	F:sequence-specific DNA binding transcription factor activity; F:DNA binding; C:nucleus;	-	6	0	3.82543	5.68398	26.0112	3.39444e-07	5.81157e-06
qs_c26125	serine threonine-protein phosphatase 6 regulatory subunit 3-like	606	5.50127e-57	0.928	C:membrane; C:vacuole; C:cytosol; C:plasma membrane	-	6	0	3.82543	5.68398	26.0112	3.39444e-07	5.81157e-06
qs_c26948	protein	551	1.7543e-57	0.8885	F:molecular_function		6	0	3.82543	5.68398	26.0112	3.39444e-07	5.81157e-06
qs_c27036	copia-type polyprotein	578	3.25008e-22	0.7375	F:nucleic acid binding; F:binding; P:DNA metabolic process	-	6	0	3.82543	5.68398	26.0112	3.39444e-07	5.81157e-06
qs_c57211	tyramine n-feruloyltransferase 4 11-like	618	7.24359e-56	0.8295	F:transferase activity; P:metabolic process; C:plastid	EC:2.3.1.110	6	0	3.82543	5.68398	26.0112	3.39444e-07	5.81157e-06
qs_c59382	oligopeptide transporter 6-like	568	4.50529e-92	0.8135	F:transporter activity; P:transport; C:plasma membrane; P:cellular process	-	6	0	3.82543	5.68398	26.0112	3.39444e-07	5.81157e-06
qs_c61300	pentatricopeptide repeat-containing protein at5g25630-like	606	5.35312e-25	0.7023	-		6	0	3.82543	5.68398	26.0112	3.39444e-07	5.81157e-06
qs_c61442	protein phosphatase 2c 51	514	1.25451e-07	0.8545	F:hydrolase activity; P:cellular protein modification process; F:nucleotide binding; F:kinase activity; C:mitochondrion	EC:2.7.11.0	4	0	3.82543	5.68398	26.0112	3.39444e-07	5.81157e-06
qs_c63277	probable membrane-associated kinase regulator 6-like	529	1.67059e-33	0.728	C:membrane		4	0	3.82543	5.68398	26.0112	3.39444e-07	5.81157e-06
qs_c63635	dna-directed rna polymerases and iii subunit rpabc1-like	523	9.12355e-12	0.871	F:transferase activity; ; F:DNA binding; C:nucleoplasm	EC:2.7.7.6	4	0	3.82543	5.68398	26.0112	3.39444e-07	5.81157e-06
qs_c64497	gamma-interferon-inducible lysosomal thiol reductase	501	8.95202e-61	0.7535	-		4	0	3.82543	5.68398	26.0112	3.39444e-07	5.81157e-06
qs_c64511	kelch-like protein 12-like	541	4.44121e-63	0.738	P:anatomical structure morphogenesis; P:flower development	-	4	0	3.82543	5.68398	26.0112	3.39444e-07	5.81157e-06
qs_c64681	lissencephaly-1 homolog	512	1.70304e-90	0.817	F:kinase activity	EC:2.7.11.7	4	0	3.82543	5.68398	26.0112	3.39444e-07	5.81157e-06
qs_c64752	polypyrimidine tract-binding protein homolog 3-like	564	3.40232e-67	0.9015	P:nucleobase-containing compound metabolic process; F:RNA binding; P:metabolic process; P:translation; C:cytoplasm; F:nucleotide binding; F:catalytic activity; C:nucleus	EC:1.3.1.74	6	0	3.82543	5.68398	26.0112	3.39444e-07	5.81157e-06
qs_c64910	plant-specific domain tigr01589 family protein	499	3.00161e-22	0.873	P:biological_process	-	4	0	3.82543	5.68398	26.0112	3.39444e-07	5.81157e-06
qs_c64976	hypothetical protein PRUPE_ppa026797mg	548	1.38117e-31	0.6367	-		4	0	3.82543	5.68398	26.0112	3.39444e-07	5.81157e-06
qs_c65607	tmv resistance protein	494	5.72454e-15	0.5465	F:binding	-	4	0	3.82543	5.68398	26.0112	3.39444e-07	5.81157e-06
qs_c65898	cycloartenol synthase	509	6.1326e-39	0.8965	P:biosynthetic process; P:cellular process; P:lipid metabolic process; P:secondary metabolic process; C:membrane; F:catalytic activity	EC:5.4.99.8	4	0	3.82543	5.68398	26.0112	3.39444e-07	5.81157e-06
qs_c66561	glabrous1	551	1.44501e-13	0.945	F:DNA binding; P:anatomical structure morphogenesis; P:cell differentiation; P:cell-cell signaling; P:multicellular organismal development; F:protein binding; F:sequence-specific DNA binding transcription factor activity; P:cellular component organization; ; C:nucleus	-	4	0	3.82543	5.68398	26.0112	3.39444e-07	5.81157e-06
qs_c67213	cellulose synthase-like protein g3-like	551	9.4133e-53	0.8485	F:transferase activity; P:biosynthetic process; P:carbohydrate metabolic process; P:cellular process; C:membrane; P:cellular component organization	EC:2.4.1.12	4	0	3.82543	5.68398	26.0112	3.39444e-07	5.81157e-06
qs_c67415	protein	518	0.000614528	0.707	F:catalytic activity; F:binding	-	4	0	3.82543	5.68398	26.0112	3.39444e-07	5.81157e-06
qs_c67428	protein	505	9.58874e-73	0.836	F:hydrolase activity; P:carbohydrate metabolic process; P:catabolic process; F:binding; P:cellular protein modification process; F:nucleotide binding; F:kinase activity	EC:3.2.1.14; EC:2.7.11.0	4	0	3.82543	5.68398	26.0112	3.39444e-07	5.81157e-06
qs_c68015	dol-p-man:man c -pp-dol alpha- -mannosyltransferase	515	3.20364e-26	0.767	F:transferase activity; P:protein metabolic process; P:cellular process; P:catabolic process; P:biosynthetic process; P:cellular protein modification process; P:carbohydrate metabolic process	-	4	0	3.82543	5.68398	26.0112	3.39444e-07	5.81157e-06
qs_c68034	auxin-induced protein 5ng4-like	515	4.2131e-57	0.8425	P:cellular process; C:membrane; C:vacuole; P:anatomical structure morphogenesis; P:cellular component organization; P:cell growth; C:plasma membrane	-	4	0	3.82543	5.68398	26.0112	3.39444e-07	5.81157e-06
qs_c68162	disease resistance protein	543	3.7214e-35	0.5845	P:defense response; F:ADP binding; F:hydrolase activity; F:phosphoprotein phosphatase activity; F:transferase activity, transferring acyl groups other than amino-acyl groups		4	0	3.82543	5.68398	26.0112	3.39444e-07	5.81157e-06
qs_c68605	protein	515	3.6735e-41	0.7945	C:mitochondrion	-	4	0	3.82543	5.68398	26.0112	3.39444e-07	5.81157e-06
qs_c69168	receptor-like protein kinase	541	7.58886e-22	0.5875	F:kinase activity; P:phosphorylation; F:receptor activity		4	0	3.82543	5.68398	26.0112	3.39444e-07	5.81157e-06
qs_c69187	lrr receptor-like serine threonine-protein kinase fls2-like	492	4.41459e-63	0.7215	P:metabolic process; F:catalytic activity	-	4	0	3.82543	5.68398	26.0112	3.39444e-07	5.81157e-06
qs_c69592	tir-nbs-lrr resistance protein	536	3.6538e-61	0.744	P:biological_process; F:nucleotide binding	-	4	0	3.82543	5.68398	26.0112	3.39444e-07	5.81157e-06
qs_rep_c43195	---NA---	475			-		61	8	3.82543	5.68398	26.0112	3.39444e-07	5.81157e-06
qs_rep_c46552	3-hydroxy-3-methylglutaryl-coenzyme a reductase 1-like	745	2.82015e-56	0.973	F:nucleotide binding; P:biosynthetic process; P:cellular process; P:lipid metabolic process; C:membrane; P:nucleobase-containing compound metabolic process; F:catalytic activity; P:metabolic process	EC:1.1.1.34	9	0	3.82543	5.68398	26.0112	3.39444e-07	5.81157e-06
qs_rep_c51248	aconitate cytoplasmic-like	766	9.36041e-69	0.931	C:cytoplasm; F:binding; P:carbohydrate metabolic process; P:cellular process	EC:4.2.1.3	9	0	3.82543	5.68398	26.0112	3.39444e-07	5.81157e-06
qs_rep_c53192	60s ribosomal protein l17	843	2.42801e-51	0.9505	C:nucleolus; C:vacuole; F:structural molecule activity; C:plasma membrane; C:ribosome; C:cytosol; C:plastid; P:translation	-	13	0	3.82543	5.68398	26.0112	3.39444e-07	5.81157e-06
qs_rep_c56929	glyoxysomal fatty acid beta-oxidation multifunctional protein mfp-a-like	286	4.44464e-09	0.685	F:catalytic activity; P:catabolic process; P:cellular process; P:lipid metabolic process; C:peroxisome	EC:5.1.2.3; EC:5.3.3.8; EC:4.2.1.17	9	0	3.82469	7.50274	75.1979	4.25812e-18	4.65111e-16
qs_c68593	protein transparent testa 12-like	372	5.81702e-54	0.893	F:transporter activity; P:transport; P:cellular process; ; P:secondary metabolic process; P:pollination; P:anatomical structure morphogenesis; P:cellular component organization; P:cell differentiation; P:cell growth; P:multicellular organismal development; P:flower development; C:plasma membrane	-	6	0	3.81669	6.55845	45.0774	1.894e-11	7.66695e-10
qs_c52833	tannin-related r2r3 myb transcription partial	555	1.04293e-70	0.877	F:DNA binding	-	14	2	3.80203	8.04544	95.9434	1.18216e-22	2.24404e-20
qs_c23646	nudix hydrolase 2-like	613	8.2978e-29	0.848	P:cellular protein modification process; P:response to stress; F:nucleotide binding; P:biological_process; P:cell death; P:response to abiotic stimulus; P:response to biotic stimulus; P:signal transduction; F:hydrolase activity; F:protein binding	EC:3.6.1.6; EC:3.6.1.13; EC:3.6.1.22	6	0	3.77672	5.64334	24.9806	5.79102e-07	9.24294e-06
qs_c24071	basic 7s globulin 2 precursor small	623	1.3517e-51	0.627	P:proteolysis; F:aspartic-type endopeptidase activity; C:cell wall; P:response to salt stress; C:membrane; C:plant-type cell wall; C:plasma membrane		6	0	3.77672	5.64334	24.9806	5.79102e-07	9.24294e-06
qs_c30214	1-aminocyclopropane-1-carboxylate synthase	498	6.26952e-53	0.7895	P:biosynthetic process; ; C:plastid; C:extracellular region; P:cellular process; P:lipid metabolic process; F:catalytic activity; P:carbohydrate metabolic process; P:metabolic process; F:transferase activity; P:catabolic process; P:anatomical structure morphogenesis; P:multicellular organismal development; F:binding; P:secondary metabolic process; P:cell differentiation; P:biological_process; ; C…	EC:4.4.1.14; EC:2.5.1.47	4	0	3.77672	5.64334	24.9806	5.79102e-07	9.24294e-06
qs_c30310	aspartic proteinase nepenthesin-1	501	1.46813e-45	0.6485	F:hydrolase activity	-	4	0	3.77672	5.64334	24.9806	5.79102e-07	9.24294e-06
qs_rep_c51357	dead-box atp-dependent rna helicase 8-like	607	9.08786e-38	0.992	F:nucleic acid binding; F:nucleotide binding; F:hydrolase activity; P:reproduction	-	14	1	3.74504	7.03762	57.8906	2.77103e-14	1.83659e-12
qs_rep_c53787	---NA---	270			-		11	1	3.74239	7.59087	76.6704	2.02011e-18	2.25698e-16
qs_c32500	uncharacterized loc101211807	572	4.08554e-53	0.8125	P:transport; P:cellular process	-	13	1	3.73256	6.78084	50.0695	1.48395e-12	7.34538e-11
qs_rep_c51257	hypothetical protein PRUPE_ppa003314mg	569	8.40357e-06	0.675	P:pyrimidine nucleotide biosynthetic process; P:response to cadmium ion; F:CTP synthase activity; F:ligase activity		14	1	3.72736	7.02185	57.1128	4.11525e-14	2.63808e-12
qs_c13494	50s ribosomal protein l7 l12-like	605	1.68473e-66	0.88	; F:structural molecule activity; C:ribosome; P:translation; C:mitochondrion	-	6	0	3.72632	5.60152	23.9476	9.89933e-07	1.46077e-05
qs_c13567	30s ribosomal protein s6 chloroplastic-like	557	1.06275e-08	0.916	C:ribosome; F:structural molecule activity; P:cellular component organization; P:cellular process; P:translation; F:RNA binding; C:membrane; C:thylakoid; C:plastid	-	6	0	3.72632	5.60152	23.9476	9.89933e-07	1.46077e-05
qs_c13758	protein sda1 homolog	583	1.90464e-108	0.906	P:cellular component organization; P:cellular process; P:transport	-	6	0	3.72632	5.60152	23.9476	9.89933e-07	1.46077e-05
qs_c22817	hexose carrier protein hex6-like	550	2.19487e-92	0.876	F:transporter activity; C:membrane; F:catalytic activity; P:metabolic process; P:transport; P:cellular process	EC:1.3.1.74	4	0	3.72632	5.60152	23.9476	9.89933e-07	1.46077e-05
qs_c24166	vq motif-containing protein	496	7.35278e-17	0.5526	F:molecular_function; P:amino acid import; P:amino acid transport; P:ER to Golgi vesicle-mediated transport; P:biological_process; C:intracellular		4	0	3.72632	5.60152	23.9476	9.89933e-07	1.46077e-05
qs_c25128	ribosome biogenesis gtpase a-like	500	8.63494e-50	0.7275	F:nucleotide binding	-	4	0	3.72632	5.60152	23.9476	9.89933e-07	1.46077e-05
qs_c27052	retrotransposon unclassified	511	8.31714e-17	0.5225	F:RNA binding; P:RNA-dependent DNA replication; F:RNA-directed DNA polymerase activity; C:mitochondrion		4	0	3.72632	5.60152	23.9476	9.89933e-07	1.46077e-05
qs_c27530	hat dimerisation domain-containing protein	548	2.31418e-31	0.828	F:nucleic acid binding; F:protein binding	-	4	0	3.72632	5.60152	23.9476	9.89933e-07	1.46077e-05
qs_c27794	vacuolar protein sorting-associated	538	3.31124e-54	0.771	P:carbohydrate metabolic process; P:cellular process; P:multicellular organismal development; P:nucleobase-containing compound metabolic process; P:cell cycle; P:cellular component organization; P:anatomical structure morphogenesis; P:biosynthetic process	-	4	0	3.72632	5.60152	23.9476	9.89933e-07	1.46077e-05
qs_c28091	chloroplast envelope membrane	507	1.05888e-52	0.8945	C:membrane	-	4	0	3.72632	5.60152	23.9476	9.89933e-07	1.46077e-05
qs_c28301	s-adenosyl-l-methionine-dependent methyltransferase-like protein	530	7.77594e-74	0.8555	F:transferase activity; P:metabolic process; P:cellular process	EC:2.1.1.0	4	0	3.72632	5.60152	23.9476	9.89933e-07	1.46077e-05
qs_c4019	vacuolar iron transporter 1-like	942	2.19506e-122	0.92	P:cellular homeostasis; F:transporter activity; P:transport; P:cellular process; C:membrane; C:vacuole	-	22	2	3.72632	5.60152	23.9476	9.89933e-07	1.46077e-05
qs_rep_c40954	26s proteasome non-atpase regulatory subunit 14-like	674	3.98088e-46	0.9985	P:cell cycle; P:biosynthetic process; P:cellular protein modification process; P:response to stress; P:response to biotic stimulus; P:cellular process; P:catabolic process; P:lipid metabolic process; P:transport; P:protein metabolic process; P:response to abiotic stimulus; P:secondary metabolic process; P:cellular component organization; P:post-embryonic development; C:cytosol; C:intracellular; P…	-	8	0	3.72632	5.60152	23.9476	9.89933e-07	1.46077e-05
qs_rep_c57835	protein	701	7.01345e-15	0.905	-		8	0	3.72632	5.60152	23.9476	9.89933e-07	1.46077e-05
qs_c21160	probable s-acyltransferase at2g14255-like	565	1.50641e-73	0.8	C:membrane; F:catalytic activity; C:Golgi apparatus; P:metabolic process; F:binding; F:transferase activity	EC:1.3.1.74	10	1	3.71383	6.46825	41.5428	1.15318e-10	4.03345e-09
qs_c22067	transparent testa 12	557	1.86732e-51	0.8085	P:transport; P:cellular process; F:transporter activity; C:plastid; C:plasma membrane	-	10	1	3.71383	6.46825	41.5428	1.15318e-10	4.03345e-09
qs_c83795	probable beta- -galactosyltransferase 14-like	474	2.328e-60	0.9295	F:transferase activity; C:Golgi apparatus; P:biosynthetic process; P:cellular protein modification process; P:carbohydrate metabolic process; C:membrane	EC:2.4.1.134	5	0	3.71383	6.46825	41.5428	1.15318e-10	4.03345e-09
qs_rep_c43658	tonoplast intrinsic protein	459	1.94412e-73	0.934	P:transport; C:membrane; F:transporter activity	-	24	1	3.71383	6.46825	41.5428	1.15318e-10	4.03345e-09
qs_rep_c54271	ovarian cancer-associated gene 2 protein	477	9.76495e-40	0.9115	P:biosynthetic process; P:cellular process; P:lipid metabolic process; P:response to endogenous stimulus; ; P:response to external stimulus; P:response to stress; F:hydrolase activity; P:transport; P:response to biotic stimulus	-	6	0	3.70947	7.00591	56.3325	6.11946e-14	3.87209e-12
qs_rep_c50729	squalene synthase 2	348	1.07741e-27	0.95	C:membrane; P:biosynthetic process; P:lipid metabolic process; F:transferase activity	EC:2.5.1.21	8	0	3.67688	7.18648	61.4206	4.60969e-15	3.38829e-13
qs_c127362	mediator of rna polymerase ii transcription subunit 34-like	526	3.69822e-84	0.953	P:carbohydrate metabolic process; P:cellular process; P:nucleobase-containing compound metabolic process; P:DNA metabolic process; P:response to stress; F:nucleic acid binding; P:cell cycle; P:biosynthetic process; F:nucleotide binding; F:protein binding; C:nucleoplasm; F:hydrolase activity	-	4	0	3.67409	5.55845	22.9125	1.6955e-06	2.31013e-05
qs_c12983	cell wall invertase	497	5.39328e-38	0.7855	F:hydrolase activity; P:biosynthetic process; P:carbohydrate metabolic process; P:cellular process	EC:3.2.1.7; EC:3.2.1.26; EC:3.2.1.48; EC:3.2.1.80; EC:3.2.1.65	4	0	3.67409	5.55845	22.9125	1.6955e-06	2.31013e-05
qs_c13112	golgin candidate 3-like	523	3.51462e-05	0.928	P:cellular component organization; P:cellular process; P:transport; C:Golgi apparatus; P:biosynthetic process; P:carbohydrate metabolic process	-	4	0	3.67409	5.55845	22.9125	1.6955e-06	2.31013e-05
qs_c13483	nuclear pore complex protein	499	5.75517e-62	0.694	P:biological_process; P:transport; P:cellular process; F:protein binding; P:nucleobase-containing compound metabolic process; C:nucleolus; P:multicellular organismal development; C:nuclear envelope; P:cell cycle; P:cellular component organization; P:DNA metabolic process; C:plasma membrane; P:response to stress; P:response to abiotic stimulus; P:reproduction; P:post-embryonic development; P:metab…	-	4	0	3.67409	5.55845	22.9125	1.6955e-06	2.31013e-05
qs_c14203	uncharacterized loc101204402	502	3.54037e-31	0.644	F:molecular_function; P:biological_process; C:cellular_component; C:mitochondrion; C:membrane		4	0	3.67409	5.55845	22.9125	1.6955e-06	2.31013e-05
qs_c32356	heat shock 70 kda protein 17-like	845	9.71898e-153	0.889	C:cytosol; P:metabolic process; P:response to stress; P:cellular process; P:protein metabolic process; P:biosynthetic process; P:carbohydrate metabolic process; P:transport; P:response to abiotic stimulus; P:response to biotic stimulus; C:membrane; C:vacuole; F:nucleotide binding; F:catalytic activity; C:plastid; C:Golgi apparatus; C:plasma membrane	EC:1.3.1.74	12	1	3.67409	5.55845	22.9125	1.6955e-06	2.31013e-05
qs_rep_c53055	adp-ribosylation factor 2-like	471	1.33711e-79	0.9855	C:vacuole; F:nucleotide binding; F:binding; P:biological_process; C:plasma membrane; C:Golgi apparatus; P:transport; P:cellular process; C:plastid; P:signal transduction; C:mitochondrion	-	6	0	3.673	6.97349	54.7649	1.35843e-13	7.92838e-12
qs_rep_c53654	aux iaa protein	472	9.91712e-42	0.894	C:cytoplasm; F:protein binding; P:signal transduction; P:response to endogenous stimulus; C:nucleus;	-	6	0	3.673	6.97349	54.7649	1.35843e-13	7.92838e-12
qs_rep_c54108	lon protease homolog peroxisomal-like	449	3.64395e-22	0.9015	F:hydrolase activity; C:intracellular; P:growth; P:transport; P:cellular component organization; P:cellular process; P:protein metabolic process; P:catabolic process; P:post-embryonic development; F:DNA binding; P:nucleobase-containing compound metabolic process; C:peroxisome; F:nucleotide binding	EC:3.4.21.0	6	0	3.673	6.97349	54.7649	1.35843e-13	7.92838e-12
qs_c13967	protein	1361	0	0.871	P:metabolic process; F:catalytic activity; F:binding	EC:1.14.11.9	67	6	3.65951	6.42095	39.7593	2.87269e-10	9.60115e-09
qs_c69548	u6 snrna-associated sm-like protein lsm1	456	8.71066e-16	0.7695	C:intracellular; C:nucleus; P:reproduction; P:post-embryonic development	-	5	0	3.65951	6.42095	39.7593	2.87269e-10	9.60115e-09
qs_c73004	wd-40 repeat family protein	494	1.34052e-62	0.7825	C:plasma membrane; F:signal transducer activity; P:pollination; P:multicellular organismal development; P:signal transduction; P:reproduction; P:cellular process	-	6	0	3.65951	6.42095	39.7593	2.87269e-10	9.60115e-09
qs_c20115	unnamed protein product	476	4.69287e-57	0.828	F:molecular_function; P:biological_process		8	1	3.65723	7.51406	72.0293	2.12021e-17	2.07272e-15
qs_rep_c38856	rna binding protein	233	1.3671e-20	0.8805	F:protein binding; P:response to stress; F:RNA binding; C:nucleoplasm; C:membrane; P:nucleobase-containing compound metabolic process; F:nucleotide binding	-	7	0	3.63559	6.94032	53.1879	3.03122e-13	1.6885e-11
qs_rep_c39188	ferric reduction oxidase chloroplastic-like	268	4.87459e-11	0.7795	F:catalytic activity; F:binding; C:plasma membrane; P:generation of precursor metabolites and energy; P:photosynthesis; C:membrane; C:plastid; P:response to abiotic stimulus	EC:1.6.3.1; EC:1.16.1.7	7	0	3.63559	6.94032	53.1879	3.03122e-13	1.6885e-11
qs_rep_c46845	protein transport protein sec23	301	1.21458e-12	0.6785	C:cytosol; P:transport; P:cellular process; P:cellular component organization	-	7	0	3.63559	6.94032	53.1879	3.03122e-13	1.6885e-11
qs_rep_c50305	s-adenosylmethionine synthase 2-like	467	2.60144e-49	0.9695	F:binding; F:transferase activity; P:nucleobase-containing compound metabolic process; P:biosynthetic process; ; P:metabolic process; P:cellular process; F:nucleotide binding; C:cytoplasm; C:plasma membrane	EC:2.5.1.6	6	0	3.63559	6.94032	53.1879	3.03122e-13	1.6885e-11
qs_rep_c58534	glutamine synthetase	502	2.91692e-65	0.7765	P:biological_process; C:plastid; P:response to stress; P:catabolic process; P:cellular process; C:extracellular region; P:transport; F:nucleotide binding; C:ribosome; C:vacuole; P:cellular homeostasis; P:response to abiotic stimulus; P:metabolic process; ; P:secondary metabolic process; P:cellular component organization; P:carbohydrate metabolic process; P:generation of precursor metabolites and …	EC:6.3.1.2	8	0	3.63559	6.94032	53.1879	3.03122e-13	1.6885e-11
qs_c18381	protein trichome birefringence-like 41	785	7.86343e-118	0.787	P:biological_process		12	1	3.6199	5.51406	21.8754	2.9094e-06	3.7772e-05
qs_c18399	l-type lectin-domain containing receptor kinase -like	388	5.58981e-35	0.7865	F:kinase activity; F:carbohydrate binding; P:cellular protein modification process; F:nucleotide binding	EC:2.7.10.2; EC:2.7.11.0	12	1	3.6199	5.51406	21.8754	2.9094e-06	3.7772e-05
qs_c19729	rho gdp-dissociation inhibitor 1-like	796	1.60697e-83	0.877	C:cytoplasm; F:enzyme regulator activity	-	12	1	3.6199	5.51406	21.8754	2.9094e-06	3.7772e-05
qs_c20298	pentatricopeptide repeat-containing protein mitochondrial-like	892	8.98134e-120	0.8565	F:molecular_function; P:biological_process; C:cellular_component		12	1	3.6199	5.51406	21.8754	2.9094e-06	3.7772e-05
qs_rep_c53253	uncharacterized loc101206485	607	1.24547e-108	0.856	F:molecular_function; P:biological_process		9	0	3.60306	6.37204	37.9654	7.20097e-10	2.1999e-08
qs_rep_c36877	alpha- glucan phosphorylase l chloroplastic amyloplastic-like	440	4.3218e-69	0.9275	F:binding; P:carbohydrate metabolic process; F:protein binding; C:plastid; F:transferase activity	EC:2.4.1.1	7	0	3.59718	6.90638	51.6015	6.7991e-13	3.50404e-11
qs_rep_c37721	26s protease regulatory subunit 8 homolog a-like	221	1.17725e-29	0.982	F:hydrolase activity; C:intracellular; P:protein metabolic process; P:catabolic process; P:cellular process; F:nucleotide binding; C:nucleus; C:cytosol	EC:3.6.4.3	7	0	3.59718	6.90638	51.6015	6.7991e-13	3.50404e-11
qs_rep_c37935	t-complex protein 1 subunit eta-like	206	2.51571e-25	0.972	P:biological_process; P:protein metabolic process; P:cellular process; C:cytoplasm; F:protein binding; F:nucleotide binding	-	7	0	3.59718	6.90638	51.6015	6.7991e-13	3.50404e-11
qs_rep_c44916	glycosyltransferase family 47a	515	4.1975e-55	0.921	C:Golgi apparatus; P:cellular process; P:biosynthetic process; P:carbohydrate metabolic process; F:transferase activity; C:membrane	-	8	0	3.59718	6.90638	51.6015	6.7991e-13	3.50404e-11
qs_rep_c45486	26s protease regulatory subunit 7-like	488	2.56279e-76	0.9385	C:cytoplasm; F:hydrolase activity; C:intracellular; C:plasma membrane; P:protein metabolic process; P:catabolic process; F:nucleotide binding; C:nucleus	EC:3.6.1.15	6	0	3.59718	6.90638	51.6015	6.7991e-13	3.50404e-11
qs_rep_c49367	heat shock protein 90	496	3.24148e-61	0.979	P:protein metabolic process; P:cellular process; P:response to abiotic stimulus; C:plasma membrane; C:cell wall; P:biological_process; F:nucleotide binding; P:response to stress; F:protein binding; C:cytosol; P:response to biotic stimulus	-	6	0	3.59718	6.90638	51.6015	6.7991e-13	3.50404e-11
qs_rep_c49685	protein tify 6b-like	485	3.58496e-50	0.5975	-		6	0	3.59718	6.90638	51.6015	6.7991e-13	3.50404e-11
qs_c22676	centromere kinetochore protein zw10 homolog	912	1.34085e-94	0.722	C:intracellular; P:cellular process	-	11	1	3.56359	5.46825	20.8367	5.00144e-06	6.0625e-05
qs_c23363	atp binding	917	2.53619e-20	0.629	F:molecular_function; P:biological_process		11	1	3.56359	5.46825	20.8367	5.00144e-06	6.0625e-05
qs_c61607	calcineurin b-like protein 4-like	633	1.07483e-25	0.9185	C:cytoplasm; P:response to stress; P:response to abiotic stimulus; F:binding; P:cellular homeostasis; P:biological_process	-	5	0	3.56359	5.46825	20.8367	5.00144e-06	6.0625e-05
qs_c61693	dead-box atp-dependent rna helicase chloroplastic-like	636	2.595e-81	0.862	F:hydrolase activity; F:nucleic acid binding; F:nucleotide binding; C:plastid	-	5	0	3.56359	5.46825	20.8367	5.00144e-06	6.0625e-05
qs_c61760	peroxidase 52-like	601	1.43974e-108	0.8845	F:binding; F:catalytic activity; P:metabolic process; P:response to stress	EC:1.11.1.7	5	0	3.56359	5.46825	20.8367	5.00144e-06	6.0625e-05
qs_c62323	protein far1-related sequence 5-like	572	2.53071e-55	0.7385	F:zinc ion binding		5	0	3.56359	5.46825	20.8367	5.00144e-06	6.0625e-05
qs_c68199	retrotransposon gag protein	598	5.03484e-19	0.6571	F:nucleic acid binding; P:DNA metabolic process	-	5	0	3.56359	5.46825	20.8367	5.00144e-06	6.0625e-05
qs_c69896	dna photolyase	644	6.22143e-64	0.8265	F:hydrolase activity; F:catalytic activity; C:mitochondrion; P:response to stress; P:DNA metabolic process	-	5	0	3.56359	5.46825	20.8367	5.00144e-06	6.0625e-05
qs_c70307	cyclin isoform 2	470	2.38821e-75	0.762	P:cell cycle	-	5	0	3.56359	5.46825	20.8367	5.00144e-06	6.0625e-05
qs_rep_c122709	coiled-coil domain-containing protein 94 homolog	558	9.78779e-23	0.67	F:molecular_function; P:biological_process		5	0	3.56359	5.46825	20.8367	5.00144e-06	6.0625e-05
qs_c22744	pentatricopeptide repeat-containing protein mitochondrial-like	536	7.2364e-72	0.694	F:molecular_function; P:biological_process; C:cellular_component; C:plastid		9	1	3.56157	7.08391	56.1771	6.62293e-14	4.12393e-12
qs_rep_c40710	r2r3-myb transcription	502	4.01522e-72	0.8565	P:carbohydrate metabolic process; P:response to endogenous stimulus; P:response to external stimulus; P:response to stress; F:DNA binding; P:biological_process; P:cell growth; P:multicellular organismal development; P:response to abiotic stimulus	-	8	0	3.55772	6.87161	50.0057	1.53297e-12	7.54979e-11
qs_rep_c41389	zinc finger protein	476	3.81179e-34	0.8475	F:binding	-	6	0	3.55772	6.87161	50.0057	1.53297e-12	7.54979e-11
qs_c19980	protein	707	7.39989e-14	0.639	F:transferase activity	-	15	1	3.54432	6.32141	36.1616	1.81619e-09	5.151e-08
qs_rep_c38622	rab family gtpase	501	3.4795e-39	0.96	P:signal transduction; ; F:DNA binding; C:membrane; C:cytoplasm; C:plastid; C:vacuole; P:transport; F:nucleotide binding; C:plasma membrane	-	8	0	3.53757	6.85391	49.2044	2.3063e-12	1.09982e-10
qs_rep_c40691	alpha-amylase chloroplastic-like	469	8.57474e-82	0.927	P:biological_process; F:hydrolase activity; F:binding; P:carbohydrate metabolic process; P:cellular process; P:catabolic process; C:plastid	EC:3.2.1.1; EC:3.2.1.60	6	0	3.53757	6.85391	49.2044	2.3063e-12	1.09982e-10
qs_c18354	conserved hypothetical protein	535	7.60512e-70	0.9325	F:molecular_function; P:biological_process		9	1	3.52686	7.05322	54.6594	1.43339e-13	8.31621e-12
qs_rep_c74208	homeobox-leucine zipper protein revoluta-like	301	5.86638e-28	0.979	P:biological_process; P:cellular process; P:anatomical structure morphogenesis; P:multicellular organismal development; P:cellular component organization; ; P:growth; P:cell differentiation; F:DNA binding; F:lipid binding; F:sequence-specific DNA binding transcription factor activity; P:cell growth; P:flower development; C:nucleus; P:reproduction; P:post-embryonic development; P:embryo development	-	8	0	3.51873	7.2283	59.763	1.06997e-14	7.44489e-13
qs_rep_c37346	topoisomerase i	547	4.8821e-46	0.6765	P:cellular process; P:multicellular organismal development; P:post-embryonic development; P:anatomical structure morphogenesis; F:DNA binding; F:catalytic activity	-	8	0	3.51715	6.83599	48.4008	3.47421e-12	1.56156e-10
qs_rep_c37454	3-ketoacyl- thiolase	510	3.11749e-26	0.9035	C:membrane; C:vacuole; P:response to stress; P:response to biotic stimulus; P:response to external stimulus; P:catabolic process; P:cellular process; P:lipid metabolic process; P:protein metabolic process; P:secondary metabolic process; F:transferase activity; P:cellular component organization; C:plastid; C:peroxisome; C:nucleolus; C:cytosol; P:biosynthetic process; C:plasma membrane; P:signal tr…	EC:2.3.1.16	8	0	3.51715	6.83599	48.4008	3.47421e-12	1.56156e-10
qs_rep_c38502	zinc finger ccch domain-containing protein	471	2.06999e-42	0.7475	F:nucleic acid binding; F:binding;	-	6	0	3.51715	6.83599	48.4008	3.47421e-12	1.56156e-10
qs_c24280	protein	563	1.0329e-16	0.5695	F:transferase activity	-	5	0	3.50499	5.42095	19.7968	8.61259e-06	9.82459e-05
qs_c28280	protein scarecrow-like	629	7.95814e-21	0.608	P:cellular process; P:multicellular organismal development	-	5	0	3.50499	5.42095	19.7968	8.61259e-06	9.82459e-05
qs_c30760	non-ltr reverse transcriptase	481	2.93284e-11	0.589	C:cytoplasmic membrane-bounded vesicle; F:RNA binding; F:nucleic acid binding; P:RNA-dependent DNA replication; F:RNA-directed DNA polymerase activity		3	0	3.50499	5.42095	19.7968	8.61259e-06	9.82459e-05
qs_c3080	uncharacterized wd repeat-containing protein alr3466-like	959	1.39765e-128	0.7905	F:kinase activity; F:nucleotide binding; C:plasma membrane	EC:2.7.11.7	18	2	3.50499	5.42095	19.7968	8.61259e-06	9.82459e-05
qs_c40257	serine threonine-protein kinase sepa-like	482	1.55851e-64	0.9365	C:cytosol; P:cellular component organization; P:cellular process; F:nucleotide binding; P:cellular protein modification process; P:signal transduction; P:multicellular organismal development; F:kinase activity; F:signal transducer activity; C:plasma membrane	EC:2.7.11.25	3	0	3.50499	5.42095	19.7968	8.61259e-06	9.82459e-05
qs_rep_c41167	atp binding	706	6.62673e-90	0.8715	P:response to stress; P:signal transduction; P:response to biotic stimulus; P:reproduction; P:post-embryonic development; C:mitochondrion; C:membrane; C:plastid; F:transporter activity; F:nucleotide binding; P:response to endogenous stimulus; F:hydrolase activity; P:metabolic process; P:cellular process; C:endoplasmic reticulum	EC:3.6.1.3	7	0	3.50499	5.42095	19.7968	8.61259e-06	9.82459e-05
qs_rep_c46752	omega-3 fatty acid desaturase	1105	3.53676e-114	0.9425	P:biosynthetic process; P:cellular process; P:lipid metabolic process; C:plastid; F:catalytic activity; P:response to stress; P:response to abiotic stimulus; P:metabolic process	EC:1.14.19.0	17	0	3.50499	5.42095	19.7968	8.61259e-06	9.82459e-05
qs_rep_c50301	sucrose synthase	750	2.18107e-93	0.716	P:metabolic process; F:transferase activity	-	7	0	3.50499	5.42095	19.7968	8.61259e-06	9.82459e-05
qs_rep_c50333	adp-ribosylation factor 2-like	688	1.11479e-45	1	P:transport; P:cellular process; C:cytosol; F:binding; P:signal transduction; C:plasma membrane; C:plastid; F:enzyme regulator activity; P:cellular protein modification process; P:biosynthetic process; F:transporter activity; C:vacuole; P:biological_process; C:Golgi apparatus; F:nucleotide binding	-	7	0	3.50499	5.42095	19.7968	8.61259e-06	9.82459e-05
qs_rep_c53412	farnesyl diphosphate synthase	451	2.56458e-65	0.931	-		7	0	3.50499	5.42095	19.7968	8.61259e-06	9.82459e-05
qs_c5946	rint1-like	642	1.96367e-91	0.857	P:transport; P:cellular process; C:cytosol; C:membrane; C:endoplasmic reticulum	-	11	1	3.50353	6.58015	41.6532	1.08985e-10	3.88137e-09
qs_rep_c59140	cellulose partial	278	6.93589e-24	0.984	F:transferase activity; P:biosynthetic process; P:carbohydrate metabolic process; P:cellular process; C:membrane; P:cellular component organization; F:binding	EC:2.4.1.12; EC:2.4.1.29	8	0	3.50315	7.2145	59.0382	1.54643e-14	1.05351e-12
qs_rep_c56715	cytochrome b5	292	2.20026e-10	0.906	P:response to stress; P:response to biotic stimulus; P:biosynthetic process; P:cellular process; P:lipid metabolic process; P:secondary metabolic process; F:protein binding; F:catalytic activity; F:binding; C:endoplasmic reticulum; P:metabolic process	EC:1.7.1.1	8	0	3.48741	7.20056	58.3114	2.23749e-14	1.48801e-12
qs_rep_c51557	kda vesicle transport	659	8.36544e-109	0.974	P:protein metabolic process; P:cellular process; P:response to abiotic stimulus; C:Golgi apparatus; P:response to stress; C:plasma membrane; P:transport; C:membrane; C:endoplasmic reticulum; F:transporter activity	-	8	0	3.48308	6.26895	34.3482	4.60824e-09	1.20294e-07
qs_rep_c51506	ethylene-responsive transcription factor 12-like	526	2.40533e-15	0.6169	P:regulation of transcription, DNA-dependent; P:transcription, DNA-dependent; C:nucleus; F:sequence-specific DNA binding transcription factor activity; F:DNA binding		10	1	3.47017	7.34695	62.4722	2.70226e-15	2.09661e-13
qs_c126586	hypothetical protein PRUPE_ppa014878mg	548	2.14754e-42	0.65	F:uroporphyrinogen-III synthase activity; P:tetrapyrrole biosynthetic process		9	1	3.45482	6.98979	51.5983	6.81022e-13	3.50404e-11
qs_c75125	homeobox-leucine zipper protein athb-14-like	444	4.9332e-65	0.9445	P:anatomical structure morphogenesis; P:multicellular organismal development; P:embryo development; ; P:reproduction; P:post-embryonic development; F:DNA binding; F:sequence-specific DNA binding transcription factor activity; P:flower development; C:nucleus	-	5	0	3.45146	6.24198	33.4382	7.3566e-09	1.84879e-07
qs_c80152	thioredoxin-like protein chloroplastic-like	408	7.5738e-25	0.749	P:metabolic process; C:thylakoid; P:cellular homeostasis; F:molecular_function; P:cellular component organization; P:cellular process; F:catalytic activity; C:membrane; C:plastid; P:biosynthetic process; P:carbohydrate metabolic process; P:secondary metabolic process	EC:1.8.4.0	5	0	3.45146	6.24198	33.4382	7.3566e-09	1.84879e-07
qs_c84397	protein transparent testa	283	6.55867e-06	0.7805	P:transport; P:cellular process; C:membrane; F:transporter activity	-	5	0	3.45146	6.24198	33.4382	7.3566e-09	1.84879e-07
qs_c27417	potassium channel	479	3.15318e-25	0.655	P:cellular process; P:transport; F:transporter activity	-	3	0	3.44392	5.37204	18.756	1.48553e-05	0.000160914
qs_c29752	tmv resistance protein n-like	480	0.00142149	0.8035	F:receptor activity; P:response to stress; F:nucleotide binding; C:intracellular; P:signal transduction; C:membrane; F:hydrolase activity	EC:3.6.1.15	3	0	3.44392	5.37204	18.756	1.48553e-05	0.000160914
qs_c30044	pentatricopeptide repeat-containing protein at4g20090-like	494	2.12985e-86	0.8455	P:reproduction; P:post-embryonic development; P:embryo development	-	3	0	3.44392	5.37204	18.756	1.48553e-05	0.000160914
qs_c30065	glutamate-gated kainate-type ion channel receptor subunit 5	487	3.13925e-21	0.799	P:response to biotic stimulus; C:vacuole; F:transporter activity; P:transport; F:receptor activity; C:membrane; P:signal transduction; C:external encapsulating structure	-	3	0	3.44392	5.37204	18.756	1.48553e-05	0.000160914
qs_c56631	protein	868	2.07454e-102	0.84	P:metabolic process; F:transferase activity; C:plastid	EC:2.3.1.0	10	1	3.44392	5.37204	18.756	1.48553e-05	0.000160914
qs_c59268	pentatricopeptide repeat-containing protein at4g21065-like	681	1.10946e-83	0.746	F:molecular_function; P:biological_process		7	0	3.44392	5.37204	18.756	1.48553e-05	0.000160914
qs_c68905	uncharacterized crm domain-containing protein chloroplastic-like	389	5.51551e-41	0.892	F:RNA binding; C:mitochondrion	-	5	0	3.41913	6.2145	32.526	1.17609e-08	2.78726e-07
qs_c69783	transposon en spm sub-class	269	0.000113846	0.6182	-		5	0	3.41913	6.2145	32.526	1.17609e-08	2.78726e-07
qs_rep_c38394	adp-ribosylation factor 3	606	2.44215e-96	0.989	F:protein binding; P:flower development; P:biological_process; P:metabolic process; P:cellular process; ; P:post-embryonic development; F:nucleotide binding; P:multicellular organismal development; P:transport; P:signal transduction; P:biosynthetic process; P:carbohydrate metabolic process; F:DNA binding; C:Golgi apparatus; P:anatomical structure morphogenesis; P:cell differentiation; F:sequence-…	-	8	0	3.41913	6.2145	32.526	1.17609e-08	2.78726e-07
qs_rep_c44777	clathrin binding	564	4.01888e-55	0.6935	F:protein binding; C:cell	-	8	0	3.41913	6.2145	32.526	1.17609e-08	2.78726e-07
qs_c31363	coatomer subunit beta-1-like	602	1.10954e-116	0.9285	C:plasma membrane; F:protein binding; P:transport; P:cellular process; C:cytosol; C:membrane; C:Golgi apparatus; F:structural molecule activity	-	10	1	3.40067	6.49134	38.2202	6.3194e-10	2.00733e-08
qs_rep_c45342	desi-like protein at4g17486-like	523	1.00168e-82	0.8665	-		7	0	3.38811	6.72351	43.5325	4.16971e-11	1.61438e-09
qs_rep_c45608	probable xyloglucan endotransglucosylase hydrolase protein 8-like	527	1.45646e-44	0.928	F:hydrolase activity; P:carbohydrate metabolic process; P:cellular process; C:extracellular region; C:cell wall; F:transferase activity	EC:3.2.1.0; EC:2.4.1.207	7	0	3.38811	6.72351	43.5325	4.16971e-11	1.61438e-09
qs_c18145	linoleate 13s-lipoxygenase 2- chloroplastic-like	786	7.40857e-91	0.857	P:response to endogenous stimulus; P:metabolic process; P:response to biotic stimulus; P:response to external stimulus; P:response to stress; C:plastid; P:biosynthetic process; P:cellular process; P:lipid metabolic process; C:membrane; C:thylakoid; F:catalytic activity; F:binding	EC:1.13.11.12	14	1	3.38606	6.18648	31.6118	1.88283e-08	4.2806e-07
qs_c116245	myosin-j heavy chain-like	460	3.01453e-62	0.793	F:sequence-specific DNA binding transcription factor activity; P:biosynthetic process; P:cellular process; P:lipid metabolic process; P:secondary metabolic process; P:anatomical structure morphogenesis; P:multicellular organismal development; P:transport; F:enzyme regulator activity; C:plastid; C:endoplasmic reticulum; P:biological_process; P:nucleobase-containing compound metabolic process; P:ca…	-	3	0	3.38014	5.32141	17.7148	2.56616e-05	0.000257301
qs_c12165	60s ribosomal protein l39	434	4.8738e-23	0.9665	F:structural molecule activity; C:ribosome; C:cytosol; P:translation	-	3	0	3.38014	5.32141	17.7148	2.56616e-05	0.000257301
qs_c123113	dna binding	422	5.86634e-40	0.8565	F:protein binding; C:nucleus; F:binding	-	3	0	3.38014	5.32141	17.7148	2.56616e-05	0.000257301
qs_c123529	ycf49-like	445	6.14615e-33	0.954	P:cellular component organization; P:generation of precursor metabolites and energy; P:photosynthesis	-	3	0	3.38014	5.32141	17.7148	2.56616e-05	0.000257301
qs_c123620	methyltransferase-like protein mitochondrial-like	478	1.36985e-49	0.9065	F:binding; P:translation; P:metabolic process; P:cellular process; F:transferase activity	EC:2.1.1.0	3	0	3.38014	5.32141	17.7148	2.56616e-05	0.000257301
qs_c123636	probable glutamate carboxypeptidase 2-like	471	1.49782e-40	0.824	F:hydrolase activity; P:metabolic process; P:flower development; P:reproduction; P:post-embryonic development; P:growth; P:response to abiotic stimulus; F:receptor activity; P:multicellular organismal development; P:protein metabolic process; P:catabolic process; F:catalytic activity; P:anatomical structure morphogenesis; P:embryo development	EC:3.4.17.0; EC:1.3.1.74; EC:3.4.13.0	3	0	3.38014	5.32141	17.7148	2.56616e-05	0.000257301
qs_c123663	myb-like protein sp	492	8.96064e-40	0.5644	P:phosphate-containing compound metabolic process; C:cytoplasm; F:magnesium ion binding; F:inorganic diphosphatase activity; F:molecular_function; P:biological_process; C:cellular_component		3	0	3.38014	5.32141	17.7148	2.56616e-05	0.000257301
qs_c123696	protein	481	2.09229e-39	0.692	P:catabolic process; P:cellular process; P:lipid metabolic process	-	3	0	3.38014	5.32141	17.7148	2.56616e-05	0.000257301
qs_c126569	phytoalexin deficient 4	392	6.8291e-29	0.738	P:lipid metabolic process; F:hydrolase activity	EC:3.1.1.3	5	0	3.38014	5.32141	17.7148	2.56616e-05	0.000257301
qs_c13230	zinc finger protein	481	3.99794e-31	0.8965	F:binding; F:catalytic activity; P:response to extracellular stimulus; P:cell communication; P:response to stress	-	3	0	3.38014	5.32141	17.7148	2.56616e-05	0.000257301
qs_c13551	lag1 longevity assurance homolog 2-like	406	3.0985e-26	0.7665	C:Golgi apparatus; C:plasma membrane; F:transferase activity; P:biosynthetic process; P:cellular process; P:lipid metabolic process; P:response to biotic stimulus; C:membrane; C:endoplasmic reticulum	EC:2.3.1.24	3	0	3.38014	5.32141	17.7148	2.56616e-05	0.000257301
qs_c14294	protein reticulata-related 1	488	1.43537e-34	0.8745	P:multicellular organismal development; C:membrane; C:plastid; C:mitochondrion	-	3	0	3.38014	5.32141	17.7148	2.56616e-05	0.000257301
qs_c17902	probable lrr receptor-like serine threonine-protein kinase at2g23950-like	301	1.51658e-25	0.7705	P:cell-cell signaling; P:flower development; P:anatomical structure morphogenesis; P:multicellular organismal development; P:growth; C:membrane; P:cellular protein modification process; F:kinase activity; P:biological_process; P:regulation of gene expression, epigenetic; P:nucleobase-containing compound metabolic process; F:nucleotide binding; P:response to stress; P:response to biotic stimulus	EC:2.7.11.0	3	0	3.38014	5.32141	17.7148	2.56616e-05	0.000257301
qs_c21721	hypothetical protein PRUPE_ppa019578mg	810	5.007e-104	0.8255	F:molecular_function; P:biological_process; C:cellular_component		10	1	3.38014	5.32141	17.7148	2.56616e-05	0.000257301
qs_c27147	pentatricopeptide repeat-containing protein mitochondrial-like	364	5.789e-32	0.7325	P:biological_process		3	0	3.38014	5.32141	17.7148	2.56616e-05	0.000257301
qs_c28959	bpi lbp family protein at3g20270-like	442	3.61441e-35	0.7315	C:cell; F:lipid binding	-	3	0	3.38014	5.32141	17.7148	2.56616e-05	0.000257301
qs_c56419	beta-	434	3.50447e-64	0.858	P:carbohydrate metabolic process; F:binding; F:hydrolase activity	EC:3.2.1.21	3	0	3.38014	5.32141	17.7148	2.56616e-05	0.000257301
qs_c58193	lactosylceramide 4-alpha-	432	2.76742e-50	0.785	C:Golgi apparatus; F:transferase activity	EC:2.4.1.228	3	0	3.38014	5.32141	17.7148	2.56616e-05	0.000257301
qs_c63971	50s ribosomal protein l18	432	1.36676e-57	0.925	C:ribosome; C:membrane; F:structural molecule activity; P:translation	-	3	0	3.38014	5.32141	17.7148	2.56616e-05	0.000257301
qs_c68460	nac domain ipr003441	404	1.14558e-36	0.8465	P:reproduction; P:cellular process; F:DNA binding; P:biosynthetic process; ; P:secondary metabolic process; ; P:flower development; C:nucleus	-	3	0	3.38014	5.32141	17.7148	2.56616e-05	0.000257301
qs_rep_c48050	transcription factor bhlh66-like	879	7.75672e-51	0.5825	F:protein dimerization activity		9	0	3.38014	5.32141	17.7148	2.56616e-05	0.000257301
qs_rep_c55117	---NA---	464			-		15	0	3.38014	5.32141	17.7148	2.56616e-05	0.000257301
qs_c10097	snf1-related protein kinase regulatory subunit gamma-1-like	482	4.71524e-60	0.72	F:catalytic activity	-	7	1	3.37209	7.09902	53.1678	3.06233e-13	1.69137e-11
qs_rep_c69269	d-cysteine desulfhydrase	463	4.01431e-08	0.7995	C:cytosol; F:hydrolase activity; P:response to stress; P:catabolic process; P:cellular process; P:biosynthetic process; ; C:mitochondrion; P:response to abiotic stimulus; F:binding; P:biological_process; P:carbohydrate metabolic process; P:lipid metabolic process; F:catalytic activity; P:generation of precursor metabolites and energy; C:plastid; P:secondary metabolic process	EC:3.5.99.7; EC:4.4.1.15	6	0	3.35484	7.08391	52.4252	4.46959e-13	2.44105e-11
qs_c22611	dna helicase mcm9-like	566	1.15357e-79	0.8765	F:hydrolase activity; P:DNA metabolic process; P:biosynthetic process; F:DNA binding; F:protein binding; F:nucleotide binding	-	8	1	3.35221	6.15791	30.6956	3.01842e-08	6.66423e-07
qs_c23072	unknown	641	1.8774e-26	0.679	F:molecular_function; P:biological_process; C:cellular_component		8	1	3.35221	6.15791	30.6956	3.01842e-08	6.66423e-07
qs_rep_c49166	myb transcription factor myb93	386	2.33738e-06	0.7245	F:nucleic acid binding	-	6	0	3.34239	6.68398	41.8926	9.6428e-11	3.44044e-09
qs_rep_c49317	udp-galactose transporter 2-like	179	4.16691e-09	0.9505	P:response to biotic stimulus; C:Golgi apparatus; P:transport; F:transporter activity; C:membrane	-	6	0	3.34239	6.68398	41.8926	9.6428e-11	3.44044e-09
qs_rep_c57947	glycerol kinase	489	3.7924e-96	0.9285	C:cytosol; F:kinase activity; P:carbohydrate metabolic process; P:catabolic process; P:cellular process; P:biological_process; P:lipid metabolic process; P:response to biotic stimulus; P:metabolic process	EC:2.7.1.30	6	0	3.31971	7.05322	50.934	9.55227e-13	4.85106e-11
qs_rep_c59228	calcineurin b-like 10	487	2.40047e-38	0.739	P:cell growth; P:anatomical structure morphogenesis; P:cell differentiation; P:multicellular organismal development; F:binding; P:biosynthetic process; P:carbohydrate metabolic process; P:cellular component organization; P:response to stress; P:response to abiotic stimulus; C:membrane; C:vacuole; P:response to external stimulus; P:biological_process; F:protein binding; P:signal transduction; C:pl…	-	6	0	3.31971	7.05322	50.934	9.55227e-13	4.85106e-11
qs_rep_c48607	e3 ubiquitin-protein ligase at4g11680-like	710	7.70632e-37	0.7675	C:membrane; C:vacuole; F:binding; C:plasma membrane	-	22	2	3.31939	6.87161	46.1609	1.08931e-11	4.65026e-10
qs_rep_c45630	60s ribosomal protein l31	413	2.67982e-44	0.9505	F:structural molecule activity; C:plasma membrane; C:cell wall; C:ribosome; C:cytosol; C:plastid; P:translation	-	6	0	3.31898	6.66381	41.0695	1.46909e-10	5.04808e-09
qs_rep_c46898	40s ribosomal protein s4	374	3.34324e-57	0.9985	C:nucleolus; C:ribosome; F:structural molecule activity; C:plasma membrane; F:RNA binding; C:plastid; P:translation	-	6	0	3.31898	6.66381	41.0695	1.46909e-10	5.04808e-09
qs_c19785	e3 ubiquitin-protein ligase keg-like	581	3.22174e-14	0.946	P:signal transduction; P:response to endogenous stimulus; P:response to stress; P:cellular protein modification process; F:binding; F:catalytic activity; F:protein binding; P:generation of precursor metabolites and energy; P:nucleobase-containing compound metabolic process; P:catabolic process; C:endosome; F:kinase activity; F:nucleotide binding; P:growth; C:Golgi apparatus; F:hydrolase activity	EC:1.6.5.3; EC:2.7.10.0; EC:6.3.2.19; EC:3.1.1.4	8	1	3.31755	6.12877	29.7777	4.84535e-08	1.02086e-06
qs_rep_c41697	v-type proton atpase subunit h-like	711	3.88675e-71	0.891	C:vacuole; F:hydrolase activity; F:transporter activity; P:transport; P:cellular process; F:binding; P:response to stress; P:response to abiotic stimulus; P:anatomical structure morphogenesis; P:cellular component organization; C:plastid; C:Golgi apparatus; P:biosynthetic process; P:cellular protein modification process; P:carbohydrate metabolic process; C:membrane; P:cell growth; C:plasma membra…	-	6	0	3.31342	5.26895	16.6738	4.43906e-05	0.000421732
qs_rep_c54217	e3 ubiquitin protein ligase rie1-like	786	9.78733e-65	0.7105	F:binding; C:membrane; C:vacuole	-	6	0	3.31342	5.26895	16.6738	4.43906e-05	0.000421732
qs_c12300	---NA---	661			-		26	3	3.30181	7.03762	50.1856	1.3987e-12	6.94098e-11
qs_rep_c45090	dehydoascorbate reductase	374	1.21103e-41	0.945	P:metabolic process; F:catalytic activity	EC:1.8.5.1	6	0	3.29518	6.64334	40.2445	2.24086e-10	7.60649e-09
qs_rep_c45415	chaperone protein dnaj 6-like	430	2.90722e-47	0.8795	P:anatomical structure morphogenesis; P:flower development; P:cellular protein modification process; F:protein binding; P:metabolic process; F:kinase activity; P:protein metabolic process; P:cellular process; P:DNA metabolic process; P:biosynthetic process; F:catalytic activity; F:molecular_function; F:nucleotide binding; F:binding; P:response to stress	EC:2.7.11.0	6	0	3.29518	6.64334	40.2445	2.24086e-10	7.60649e-09
qs_c126533	abc transporter b family member 28-like	644	6.5167e-18	0.937	P:transport; P:cellular process; F:hydrolase activity; F:transporter activity; C:membrane; P:nucleobase-containing compound metabolic process; P:catabolic process; C:plastid; F:nucleotide binding	EC:3.6.3.44	8	1	3.28204	6.09902	28.8581	7.78811e-08	1.59448e-06
qs_c9073	thiol-disulfide oxidoreductase dcc isoform 1	516	3.57617e-09	0.4935	-		5	0	3.28204	6.09902	28.8581	7.78811e-08	1.59448e-06
qs_rep_c37835	protein	402	6.49151e-18	0.7965	P:metabolic process; F:transferase activity	-	6	0	3.27099	6.62258	39.4175	3.42217e-10	1.12643e-08
qs_rep_c38592	exocyst complex component 3-like	378	1.37371e-58	0.9335	P:pollination; P:cellular process; C:plasma membrane; C:cytoplasm; C:cytosol; P:anatomical structure morphogenesis; P:cellular component organization; P:cell differentiation; P:cell growth; P:multicellular organismal development	-	6	0	3.27099	6.62258	39.4175	3.42217e-10	1.12643e-08
qs_rep_c39142	leucine aminopeptidase chloroplastic-like	350	1.27438e-49	0.9085	P:biological_process; C:vacuole; F:binding; F:hydrolase activity; C:plastid; P:protein metabolic process; P:catabolic process; C:cytosol	EC:3.4.11.0	6	0	3.27099	6.62258	39.4175	3.42217e-10	1.12643e-08
qs_rep_c39626	eukaryotic peptide chain release factor subunit 1-3-like	140	8.176e-12	0.992	C:cytoplasm; P:cellular component organization; P:translation; F:translation factor activity, nucleic acid binding; C:plasma membrane	-	6	0	3.27099	6.62258	39.4175	3.42217e-10	1.12643e-08
qs_rep_c40507	pleiotropic drug resistance protein 3-like	309	1.98777e-42	0.947	P:multicellular organismal development; F:hydrolase activity; F:transporter activity; P:transport; P:nucleobase-containing compound metabolic process; P:catabolic process; F:nucleotide binding; P:response to endogenous stimulus; P:cellular process; C:plasma membrane	EC:3.6.3.28	6	0	3.27099	6.62258	39.4175	3.42217e-10	1.12643e-08
qs_rep_c53509	adenine nucleotide translocator	474	3.98067e-56	0.962	C:membrane; C:vacuole; P:cellular component organization; P:cellular process; P:response to stress; P:response to biotic stimulus; P:biosynthetic process; P:carbohydrate metabolic process; C:plastid; P:protein metabolic process; P:catabolic process; F:transporter activity; C:mitochondrion; C:cell wall; P:anatomical structure morphogenesis; P:cell differentiation; P:multicellular organismal develo…	-	5	0	3.27099	6.62258	39.4175	3.42217e-10	1.12643e-08
qs_rep_c54058	cyclophilin	454	1.0764e-39	0.682	C:cell	-	5	0	3.27099	6.62258	39.4175	3.42217e-10	1.12643e-08
qs_rep_c58306	uncharacterized isochorismatase family	354	5.38406e-18	0.902	F:hydrolase activity; P:nucleobase-containing compound metabolic process; P:biosynthetic process; P:response to endogenous stimulus	EC:3.5.1.19	7	0	3.26534	7.00591	48.6831	3.00854e-12	1.40055e-10
qs_rep_c62958	wound-induced protein win2	402	1.33575e-22	0.858	P:response to stress; P:response to abiotic stimulus; F:carbohydrate binding; P:response to biotic stimulus; P:response to endogenous stimulus	-	7	0	3.26534	7.00591	48.6831	3.00854e-12	1.40055e-10
qs_rep_c85962	60s ribosomal protein l11-like	433	3.84419e-27	0.978	C:nucleolus; C:vacuole; F:structural molecule activity; C:ribosome; C:cytosol; C:plastid; C:membrane; P:translation; F:RNA binding	-	7	0	3.26534	7.00591	48.6831	3.00854e-12	1.40055e-10
qs_rep_c123497	e3 ubiquitin-protein ligase synoviolin-like	427	3.93814e-82	0.934	F:catalytic activity; P:protein metabolic process; P:cellular process; P:response to abiotic stimulus; P:response to stress; C:plasma membrane; P:biosynthetic process; ; P:catabolic process; F:binding	-	9	1	3.25389	7.43292	60.3382	7.988e-15	5.65875e-13
qs_rep_c49847	14-3-3-like protein gf14 lambda	496	1.14829e-74	0.8835	P:biosynthetic process; P:carbohydrate metabolic process; P:cellular process; C:plastid; C:cell wall; P:signal transduction; P:response to endogenous stimulus; F:hydrolase activity; ; P:response to stress; P:response to abiotic stimulus; P:catabolic process; P:secondary metabolic process; P:metabolic process; P:response to biotic stimulus; C:cytosol; F:protein binding; P:generation of precursor m…	EC:3.6.1.0	5	0	3.24638	6.60152	38.5886	5.23235e-10	1.67162e-08
qs_rep_c50056	ubiquitin conjugating	477	1.9505e-55	0.7855	F:catalytic activity; P:cellular protein modification process	EC:6.3.2.19	5	0	3.24638	6.60152	38.5886	5.23235e-10	1.67162e-08
qs_rep_c53194	rab gdp dissociation inhibitor alpha-like	489	1.93362e-37	0.9565	F:enzyme regulator activity; P:transport; P:cellular process	-	5	0	3.24638	6.60152	38.5886	5.23235e-10	1.67162e-08
qs_c20501	pentatricopeptide repeat-containing protein at5g61800-like	777	4.59936e-140	0.7745	F:binding; C:membrane	-	12	1	3.24562	6.06865	27.9369	1.25338e-07	2.39785e-06
qs_c123000	nadp-dependent alkenal double bond reductase p2	398	4.56817e-08	0.7625	F:binding; F:catalytic activity; P:metabolic process	EC:1.3.1.74	9	1	3.24345	5.2145	15.6334	7.68835e-05	0.000656431
qs_c126110	---NA---	496			-		3	0	3.24345	5.2145	15.6334	7.68835e-05	0.000656431
qs_c126805	auxin-responsive protein iaa4	844	5.39383e-58	0.6995	P:multicellular organismal development; P:metabolic process; C:intracellular; P:response to abiotic stimulus; P:response to endogenous stimulus; C:cytoplasm; P:post-embryonic development;	-	9	1	3.24345	5.2145	15.6334	7.68835e-05	0.000656431
qs_c18723	feruloyl esterase a	1027	2.63869e-96	0.734	C:membrane; C:vacuole; F:hydrolase activity; P:lipid metabolic process	EC:3.1.1.3	14	1	3.24345	5.2145	15.6334	7.68835e-05	0.000656431
qs_c19035	prolyl 4-hydroxylase subunit alpha-1-like	397	1.50036e-46	0.7735	P:response to stress; F:catalytic activity; P:cellular protein modification process; ; F:binding; C:Golgi apparatus	EC:1.14.11.0	15	2	3.24345	5.2145	15.6334	7.68835e-05	0.000656431
qs_c21731	serine threonine-protein kinase atr-like	902	5.64056e-129	0.8585	P:cellular component organization; P:response to stress; P:DNA metabolic process; P:response to abiotic stimulus; P:reproduction; P:cell cycle; F:kinase activity; C:plasma membrane; C:plastid; P:biological_process; P:catabolic process; F:nucleotide binding; P:biosynthetic process; P:metabolic process; P:cellular process	EC:2.7.11.0	8	1	3.24345	5.2145	15.6334	7.68835e-05	0.000656431
qs_c26672	f-box kelch-repeat protein at3g23880-like	751	1.61232e-55	0.664	-		6	0	3.24345	5.2145	15.6334	7.68835e-05	0.000656431
qs_c30891	cc-nbs-lrr resistance protein	538	3.26705e-43	0.634	P:defense response; F:ADP binding; F:hydrolase activity; F:phosphoprotein phosphatase activity		3	0	3.24345	5.2145	15.6334	7.68835e-05	0.000656431
qs_c31264	protease 2-like	696	1.12033e-82	0.795	C:membrane; P:protein metabolic process; P:catabolic process; F:hydrolase activity	EC:3.4.21.0	6	0	3.24345	5.2145	15.6334	7.68835e-05	0.000656431
qs_c31839	abc transporter g family member 11-like	499	7.60285e-68	0.9125	F:hydrolase activity; F:transporter activity; P:nucleobase-containing compound metabolic process; P:catabolic process; F:nucleotide binding; C:membrane	EC:3.6.3.28	8	1	3.24345	5.2145	15.6334	7.68835e-05	0.000656431
qs_c32340	hypothetical protein RCOM_1597820	820	9.77343e-59	0.5415	F:molecular_function; P:biological_process		8	1	3.24345	5.2145	15.6334	7.68835e-05	0.000656431
qs_c40065	myb family transcription factor apl-like	498	1.22653e-47	0.8185	F:sequence-specific DNA binding transcription factor activity; F:DNA binding;	-	3	0	3.24345	5.2145	15.6334	7.68835e-05	0.000656431
qs_c42396	nudix hydrolase mitochondrial-like	596	2.73072e-39	0.7645	F:inositol diphosphate pentakisphosphate diphosphatase activity; F:inositol bisdiphosphate tetrakisphosphate diphosphatase activity	EC:3.6.1.52	4	0	3.24345	5.2145	15.6334	7.68835e-05	0.000656431
qs_c58105	mitochondrial carnitine acylcarnitine carrier protein cacl-like	711	2.23345e-100	0.8575	P:transport; P:cellular process; F:transporter activity; C:membrane; C:mitochondrion; P:response to stress; P:response to abiotic stimulus; P:biosynthetic process;	-	6	0	3.24345	5.2145	15.6334	7.68835e-05	0.000656431
qs_c60087	chloride channel protein clc-e	706	1.71873e-113	0.8915	P:transport; P:cellular process; F:transporter activity; F:RNA binding; P:DNA metabolic process; P:biosynthetic process; P:anatomical structure morphogenesis; P:post-embryonic development; C:membrane; F:transferase activity; C:thylakoid; C:plastid	EC:2.7.7.49	6	0	3.24345	5.2145	15.6334	7.68835e-05	0.000656431
qs_c60362	transferring glycosyl	727	1.65302e-110	0.942	F:transferase activity; P:biosynthetic process	-	6	0	3.24345	5.2145	15.6334	7.68835e-05	0.000656431
qs_c61692	tmv resistance protein	518	1.16866e-38	0.688	P:biological_process; F:nucleotide binding	-	3	0	3.24345	5.2145	15.6334	7.68835e-05	0.000656431
qs_c63099	wrky transcription factor 22-like	610	1.0437e-31	0.8215	C:intracellular; ; P:metabolic process; P:response to stress; F:DNA binding; P:biological_process; F:sequence-specific DNA binding transcription factor activity	-	4	0	3.24345	5.2145	15.6334	7.68835e-05	0.000656431
qs_c63618	receptor-like protein 12-like	514	5.28869e-60	0.735	-		3	0	3.24345	5.2145	15.6334	7.68835e-05	0.000656431
qs_c64461	methionine sulfoxide reductase type	536	4.31119e-10	0.845	F:catalytic activity; C:nucleus; P:metabolic process	EC:1.8.4.11	3	0	3.24345	5.2145	15.6334	7.68835e-05	0.000656431
qs_c65343	chlorophyll a b-binding partial	423	1.00756e-55	0.9535	C:membrane; F:binding; P:generation of precursor metabolites and energy; P:photosynthesis; C:plastid	-	4	0	3.24345	5.2145	15.6334	7.68835e-05	0.000656431
qs_c67880	hypothetical protein VITISV_038127	480	4.67364e-32	0.7145	-		4	0	3.24345	5.2145	15.6334	7.68835e-05	0.000656431
qs_c68423	myosin-j heavy chain-like	634	5.21712e-114	0.9365	F:sequence-specific DNA binding transcription factor activity; P:biosynthetic process; P:cellular process; P:lipid metabolic process; P:secondary metabolic process; P:anatomical structure morphogenesis; P:multicellular organismal development; P:carbohydrate metabolic process; P:transport; F:enzyme regulator activity; C:plastid; C:endoplasmic reticulum; P:biological_process; P:nucleobase-containin…	-	4	0	3.24345	5.2145	15.6334	7.68835e-05	0.000656431
qs_c69093	retrotransposon ty1-copia subclass	568	6.11871e-41	0.6885	P:metabolic process; P:cellular process; F:binding; P:protein metabolic process; F:kinase activity; F:hydrolase activity	-	4	0	3.24345	5.2145	15.6334	7.68835e-05	0.000656431
qs_c69352	pentatricopeptide repeat-containing protein at1g53330-like	519	3.60453e-54	0.7245	P:multicellular organismal development; P:reproduction; P:embryo development	-	3	0	3.24345	5.2145	15.6334	7.68835e-05	0.000656431
qs_c69673	protein binding protein	610	7.91395e-20	0.5211	F:metal ion binding; F:zinc ion binding; F:ligase activity		4	0	3.24345	5.2145	15.6334	7.68835e-05	0.000656431
qs_c69925	oxidoreductase transition metal ion binding protein	609	3.29892e-102	0.915	F:catalytic activity; P:metabolic process; F:binding	-	4	0	3.24345	5.2145	15.6334	7.68835e-05	0.000656431
qs_c69992	expansin	538	7.862e-19	0.91	C:extracellular region; C:membrane; P:cellular component organization; P:cellular process; C:cytoplasm; C:cell wall	-	3	0	3.24345	5.2145	15.6334	7.68835e-05	0.000656431
qs_c70329	abc transporter c family member 4-like	543	9.1337e-52	0.9405	F:transporter activity; P:cellular process; P:metabolic process; P:response to stress; P:response to abiotic stimulus; C:membrane; F:hydrolase activity; P:transport; C:vacuole; C:plasma membrane; P:response to external stimulus; P:nucleobase-containing compound metabolic process; P:catabolic process; P:response to biotic stimulus; F:nucleotide binding; F:catalytic activity; C:Golgi apparatus	EC:1.3.1.74	3	0	3.24345	5.2145	15.6334	7.68835e-05	0.000656431
qs_c70508	hypothetical protein PRUPE_ppa000522mg	514	3.33618e-05	0.88	-		3	0	3.24345	5.2145	15.6334	7.68835e-05	0.000656431
qs_c70675	ribonuclease h protein at1g65750-like	511	1.68119e-19	0.636	F:hydrolase activity; F:binding; P:metabolic process; P:cellular process; F:transferase activity	-	3	0	3.24345	5.2145	15.6334	7.68835e-05	0.000656431
qs_c7177	protein phosphatase 2c	1223	1.3408e-157	0.8535	P:biosynthetic process; P:cellular process; P:response to stress; P:response to biotic stimulus; F:hydrolase activity; P:catabolic process;	-	25	4	3.24345	5.2145	15.6334	7.68835e-05	0.000656431
qs_c76954	trehalose-phosphate phosphatase-like	587	2.10666e-31	0.7695	P:biological_process; F:hydrolase activity; P:biosynthetic process; P:carbohydrate metabolic process; P:cellular process	EC:3.1.3.12	4	0	3.24345	5.2145	15.6334	7.68835e-05	0.000656431
qs_c8483	inter-alpha-trypsin inhibitor heavy	866	1.08167e-69	0.764	P:metabolic process; P:cellular process; C:plasma membrane	-	8	0	3.24345	5.2145	15.6334	7.68835e-05	0.000656431
qs_rep_c38465	heat shock protein 70	809	2.83902e-09	0.7015	P:cellular process; F:nucleotide binding; P:metabolic process; C:plastid; P:response to stress	-	8	0	3.24345	5.2145	15.6334	7.68835e-05	0.000656431
qs_c9425	expansin	867	3.18546e-128	0.955	C:extracellular region; C:membrane; P:cellular component organization; P:cellular process; P:anatomical structure morphogenesis	-	36	4	3.22169	7.12877	51.1019	8.76945e-13	4.48849e-11
qs_c22594	dnaj heat shock n-terminal domain-containing protein	504	1.26882e-52	0.7985	P:protein metabolic process; P:cellular process; F:nucleic acid binding; F:protein binding; F:nucleotide binding	-	8	1	3.21423	6.78084	42.2175	8.16659e-11	3.0184e-09
qs_c14824	drought-induced protein 1	733	2.49345e-31	0.8885	F:protein binding	-	12	1	3.20827	6.03762	27.0143	2.01954e-07	3.75343e-06
qs_c16771	branched-chain-amino-acid aminotransferase chloroplastic-like	778	9.31912e-92	0.951	P:catabolic process; P:cellular process; P:secondary metabolic process; ; P:signal transduction; C:plastid; C:cytosol; C:mitochondrion	EC:2.6.1.42	12	1	3.20827	6.03762	27.0143	2.01954e-07	3.75343e-06
qs_c77438	leucine-rich repeat receptor protein kinase exs-like	488	7.83845e-25	0.695	-		4	0	3.20827	6.03762	27.0143	2.01954e-07	3.75343e-06
qs_c8150	zinc finger with ufm1-specific peptidase domain	455	4.83068e-36	0.8375	F:binding; C:intracellular	-	4	0	3.20827	6.03762	27.0143	2.01954e-07	3.75343e-06
qs_c82762	predicted protein	483	2.67807e-05	0.6964	F:molecular_function; P:biological_process; C:cellular_component		4	0	3.20827	6.03762	27.0143	2.01954e-07	3.75343e-06
qs_c85421	serine threonine protein kinase	452	9.03133e-33	0.684	F:kinase activity	-	4	0	3.20827	6.03762	27.0143	2.01954e-07	3.75343e-06
qs_c86219	atpase family aaa domain-containing protein 3-b-like	476	8.01768e-31	0.8865	C:cell wall; F:nucleotide binding; F:hydrolase activity; C:intracellular; F:binding	EC:3.6.4.3	4	0	3.20827	6.03762	27.0143	2.01954e-07	3.75343e-06
qs_c86371	partial	492	1.18354e-23	0.9465	P:transport; P:cellular process; C:membrane; F:transporter activity	-	4	0	3.20827	6.03762	27.0143	2.01954e-07	3.75343e-06
qs_rep_c36776	dof zinc finger	586	1.23837e-07	0.77	F:DNA binding; F:binding;	-	7	0	3.20827	6.03762	27.0143	2.01954e-07	3.75343e-06
qs_c6314	dead-box atp-dependent rna helicase 16-like	783	5.12904e-123	0.812	P:transport; P:cellular process; F:hydrolase activity; F:nucleic acid binding; C:intracellular; F:nucleotide binding	-	18	2	3.19586	6.55845	36.9253	1.22741e-09	3.59796e-08
qs_rep_c45544	receptor protein	483	1.41294e-61	0.767	P:cellular protein modification process; C:plasma membrane; F:kinase activity; F:receptor activity; F:nucleotide binding; P:response to endogenous stimulus; P:signal transduction; P:biological_process; C:vacuole	-	5	0	3.19586	6.55845	36.9253	1.22741e-09	3.59796e-08
qs_rep_c45757	hydroxymethylglutaryl- synthase-like	510	2.12914e-39	0.8975	P:biosynthetic process; P:cellular process; P:lipid metabolic process; F:transferase activity	EC:2.3.3.10	6	0	3.19586	6.55845	36.9253	1.22741e-09	3.59796e-08
qs_rep_c45803	probable methyltransferase pmt26-like	476	1.01064e-44	0.8885	C:plasma membrane; C:Golgi apparatus; P:metabolic process; P:cellular process; F:transferase activity	EC:2.1.1.0	5	0	3.19586	6.55845	36.9253	1.22741e-09	3.59796e-08
qs_rep_c45949	protein	511	1.40227e-38	0.9105	C:plasma membrane	-	6	0	3.19586	6.55845	36.9253	1.22741e-09	3.59796e-08
qs_rep_c46146	7-dehydrocholesterol reductase-like	491	5.42963e-86	0.9415	P:biosynthetic process; P:cellular process; P:lipid metabolic process; C:membrane; C:endoplasmic reticulum; C:Golgi apparatus; F:catalytic activity; C:plasma membrane; F:protein binding; P:metabolic process	EC:1.3.1.21	5	0	3.19586	6.55845	36.9253	1.22741e-09	3.59796e-08
qs_rep_c46909	pith domain-containing protein 1-like	488	1.04569e-84	0.9365	F:molecular_function; P:biological_process; C:cellular_component		5	0	3.19586	6.55845	36.9253	1.22741e-09	3.59796e-08
qs_rep_c46930	er lumen protein retaining receptor-like	488	1.27354e-23	0.9635	P:transport; C:membrane; F:binding; F:receptor activity; P:cellular process	-	5	0	3.19586	6.55845	36.9253	1.22741e-09	3.59796e-08
qs_rep_c49755	protein	511	5.97035e-34	0.9385	F:binding; C:cell wall; P:metabolic process; P:cellular process; C:mitochondrion; F:transferase activity; P:nucleobase-containing compound metabolic process; P:biosynthetic process; P:transport; P:cellular component organization; P:generation of precursor metabolites and energy; P:catabolic process; F:catalytic activity; F:nucleotide binding; P:biological_process	EC:2.3.3.8; EC:6.2.1.5; EC:6.2.1.4	6	0	3.19586	6.55845	36.9253	1.22741e-09	3.59796e-08
qs_rep_c49913	plasma membrane h+-atpase	634	2.75763e-56	0.96	F:binding; F:nucleotide binding; P:transport; C:membrane; P:metabolic process; F:hydrolase activity; F:transporter activity	EC:3.6.3.6	10	1	3.19586	6.55845	36.9253	1.22741e-09	3.59796e-08
qs_rep_c59078	protein root hair defective 3 homolog 1-like	494	4.5813e-53	0.8145	C:membrane; C:vacuole; P:transport; P:carbohydrate metabolic process; P:cellular component organization; P:cellular process; P:response to stress; P:cell death; F:nucleotide binding; F:hydrolase activity; P:post-embryonic development; P:biosynthetic process; P:anatomical structure morphogenesis; P:cell differentiation; P:multicellular organismal development; P:cell growth; C:endoplasmic reticulum…	-	6	0	3.19586	6.55845	36.9253	1.22741e-09	3.59796e-08
qs_rep_c73804	coiled-coil domain-containing protein 124-like	498	1.0891e-25	0.885	P:protein metabolic process; P:catabolic process; P:cellular process; P:cellular component organization; P:transport; C:intracellular; P:response to stress; P:response to biotic stimulus	-	6	0	3.19586	6.55845	36.9253	1.22741e-09	3.59796e-08
qs_c22564	PREDICTED: uncharacterized protein LOC100811551	550	0.00272939	0.85	-		8	1	3.19225	6.76199	41.4232	1.22591e-10	4.26495e-09
qs_c18047	chloroplast-targeted copper	601	5.77691e-31	0.6155	F:metal ion binding; P:metal ion transport		14	2	3.18952	6.94032	45.6559	1.40963e-11	5.77801e-10
qs_c22015	disease resistance protein rps2-like	509	7.81315e-42	0.6861	P:response to stress; F:nucleotide binding	-	11	2	3.18309	7.49134	60.3857	7.79767e-15	5.544e-13
qs_rep_c45675	cytochrome b5	499	6.10493e-20	0.7925	P:biosynthetic process; P:cellular process; P:metabolic process; F:binding; F:catalytic activity; F:protein binding; C:membrane; C:endoplasmic reticulum; P:lipid metabolic process; P:secondary metabolic process	EC:1.7.1.1	6	0	3.16993	6.53643	36.0911	1.88309e-09	5.30521e-08
qs_c68511	ankyrin repeat domain-containing protein	462	0.000498232	0.7942	P:protein metabolic process; P:catabolic process; P:cellular process; P:cellular component organization; P:response to stress; P:DNA metabolic process; P:response to abiotic stimulus; P:reproduction; C:cell wall; P:anatomical structure morphogenesis; P:cell growth; P:cell cycle; P:response to biotic stimulus; P:biosynthetic process	-	4	0	3.16993	6.00591	26.0905	3.25776e-07	5.81157e-06
qs_c68893	phosphoglycerate mutase-like protein	472	1.10058e-67	0.859	P:response to stress; P:cell death; C:intracellular; P:biosynthetic process; ; P:secondary metabolic process; P:transport; P:cellular process; P:biological_process; F:catalytic activity; P:catabolic process	-	4	0	3.16993	6.00591	26.0905	3.25776e-07	5.81157e-06
qs_c68981	telomerase-binding protein est1a	457	1.84233e-38	0.795	C:cytoplasm; P:catabolic process; P:nucleobase-containing compound metabolic process	-	4	0	3.16993	6.00591	26.0905	3.25776e-07	5.81157e-06
qs_c69273	pentatricopeptide repeat-containing protein at1g03540-like	457	2.25974e-63	0.812	F:binding; F:nucleic acid binding	-	4	0	3.16993	6.00591	26.0905	3.25776e-07	5.81157e-06
qs_c69882	protein far1-related sequence 4-like	479	3.71326e-58	0.8535	F:binding; P:response to abiotic stimulus	-	4	0	3.16993	6.00591	26.0905	3.25776e-07	5.81157e-06
qs_c75063	probable glutathione s-transferase-like	474	6.95033e-42	0.7685	F:transferase activity; F:catalytic activity	EC:4.4.1.5	4	0	3.16993	6.00591	26.0905	3.25776e-07	5.81157e-06
qs_c76635	6-phosphofructokinase 3-like	482	1.28956e-05	0.783	P:metabolic process; P:cellular process; F:kinase activity; C:cytosol; F:nucleotide binding; P:carbohydrate metabolic process; P:generation of precursor metabolites and energy; P:catabolic process	EC:2.7.1.11	4	0	3.16993	6.00591	26.0905	3.25776e-07	5.81157e-06
qs_c76770	dna binding	463	0.00480445	0.92	-		4	0	3.16993	6.00591	26.0905	3.25776e-07	5.81157e-06
qs_rep_c38570	isoflavone 2 -hydroxylase-like	515	3.92409e-65	0.77	F:binding; F:catalytic activity; F:molecular_function; P:metabolic process	-	6	0	3.14351	6.51406	35.2551	2.89219e-09	7.96453e-08
qs_rep_c38689	eukaryotic translation initiation factor 4e type 3	479	2.02092e-42	0.9075	C:cytoplasm; P:translation; F:translation factor activity, nucleic acid binding	-	5	0	3.14351	6.51406	35.2551	2.89219e-09	7.96453e-08
qs_rep_c39317	nucleotide pyrophosphatase phosphodiesterase	504	5.4425e-25	0.885	C:cell wall; F:binding; P:biosynthetic process; P:cellular process; P:lipid metabolic process; F:hydrolase activity; C:cytoplasm; ; P:response to extracellular stimulus; P:cell communication; P:response to stress	EC:3.1.3.2	6	0	3.14351	6.51406	35.2551	2.89219e-09	7.96453e-08
qs_rep_c39616	cbl-interacting serine threonine-protein kinase 1-like	471	1.87319e-37	0.8315	F:kinase activity; P:signal transduction; C:intracellular; P:cellular process; C:plasma membrane; F:protein binding; P:cellular protein modification process; F:nucleotide binding; P:response to endogenous stimulus; P:response to stress; P:response to abiotic stimulus	EC:2.7.11.17; EC:2.7.10.0	5	0	3.14351	6.51406	35.2551	2.89219e-09	7.96453e-08
qs_rep_c39781	probable peptide nitrate transporter at5g13400-like	451	6.7842e-67	0.826	C:membrane; P:transport; F:transporter activity	-	5	0	3.14351	6.51406	35.2551	2.89219e-09	7.96453e-08
qs_rep_c40205	uncharacterized loc101218122	487	1.51963e-23	0.679	F:DNA binding; F:RNA binding; C:intracellular	-	5	0	3.14351	6.51406	35.2551	2.89219e-09	7.96453e-08
qs_rep_c41397	arm repeat protein interacting with abf2-like	451	1.66692e-62	0.9805	C:nucleoplasm; F:protein binding; F:transporter activity; P:response to stress; P:response to abiotic stimulus; P:post-embryonic development; P:response to endogenous stimulus; P:cellular process; P:transport; C:plasma membrane	-	5	0	3.14351	6.51406	35.2551	2.89219e-09	7.96453e-08
qs_rep_c41414	tgacg-sequence-specific dna-binding protein tga- -like	492	2.25839e-20	0.7775	F:sequence-specific DNA binding transcription factor activity; F:DNA binding; F:protein binding; C:nucleus;	-	6	0	3.14351	6.51406	35.2551	2.89219e-09	7.96453e-08
qs_rep_c42026	nf-x1-type zinc finger protein nfxl1-like	457	4.8808e-59	0.792	P:response to abiotic stimulus; F:binding; P:response to stress; P:response to biotic stimulus; ; P:biological_process; F:sequence-specific DNA binding transcription factor activity; F:nucleotide binding; C:nucleus; P:biosynthetic process; P:cellular process	-	5	0	3.14351	6.51406	35.2551	2.89219e-09	7.96453e-08
qs_rep_c42532	transducin wd40 domain-containing protein	508	2.61956e-76	0.774	C:intracellular; F:nucleotide binding	-	6	0	3.14351	6.51406	35.2551	2.89219e-09	7.96453e-08
qs_rep_c48829	disease resistance response protein 206-like	596	9.57885e-83	0.8375	-		16	2	3.14082	7.33424	54.9701	1.22379e-13	7.3173e-12
qs_c23181	probable trna (guanine -n )-dimethyltransferase 1-like	572	4.33764e-109	0.918	F:RNA binding; F:transferase activity; P:nucleobase-containing compound metabolic process	-	7	1	3.13053	5.97349	25.1657	5.26086e-07	8.54322e-06
qs_c66007	sphingoid long-chain bases kinase 1-like	442	4.54067e-33	0.87	P:carbohydrate metabolic process; P:cellular process; F:kinase activity; F:RNA binding; P:cellular protein modification process; P:DNA metabolic process; P:biosynthetic process; F:transferase activity; P:reproduction; P:post-embryonic development; P:lipid metabolic process; P:metabolic process; P:signal transduction; P:response to abiotic stimulus; P:tropism; C:plasma membrane	EC:2.7.1.107; EC:2.7.7.49; EC:2.7.1.138	4	0	3.13053	5.97349	25.1657	5.26086e-07	8.54322e-06
qs_c66073	at4g25360-like partial	455	1.11618e-32	0.6725	P:leaf senescence; P:gravitropism; P:biological_process; P:D-xylose metabolic process		4	0	3.13053	5.97349	25.1657	5.26086e-07	8.54322e-06
qs_c66102	hypothetical protein PRUPE_ppa022849mg	480	1.5432e-72	0.8825	C:mitochondrion; C:plasma membrane	-	4	0	3.13053	5.97349	25.1657	5.26086e-07	8.54322e-06
qs_c66479	pentatricopeptide repeat-containing protein chloroplastic-like	451	8.60489e-70	0.854	P:reproduction; P:post-embryonic development; P:embryo development	-	4	0	3.13053	5.97349	25.1657	5.26086e-07	8.54322e-06
qs_c66580	peroxisome biogenesis protein 2-like	490	1.22426e-50	0.845	C:cytosol; F:binding; C:peroxisome; P:transport; P:cellular component organization; P:cellular process; C:plasma membrane; P:response to abiotic stimulus; P:post-embryonic development; P:catabolic process; P:lipid metabolic process; C:endoplasmic reticulum	-	4	0	3.13053	5.97349	25.1657	5.26086e-07	8.54322e-06
qs_c66789	at2g36980-like protein	458	1.15235e-69	0.766	P:biological_process		4	0	3.13053	5.97349	25.1657	5.26086e-07	8.54322e-06
qs_c67088	uncharacterized loc101219885	486	6.21773e-36	0.593	F:molecular_function; P:biological_process; C:cellular_component		4	0	3.13053	5.97349	25.1657	5.26086e-07	8.54322e-06
qs_c67420	abc transporter i family member chloroplastic-like	457	4.34133e-05	0.8538	P:transport; F:protein binding; P:cellular protein modification process; P:reproduction; P:post-embryonic development; P:embryo development; P:cellular component organization; P:generation of precursor metabolites and energy; P:photosynthesis; F:hydrolase activity; F:transporter activity; P:cellular process; P:biosynthetic process; C:plastid; P:catabolic process; ; P:carbohydrate metabolic proces…	EC:3.6.3.31	4	0	3.13053	5.97349	25.1657	5.26086e-07	8.54322e-06
qs_c68119	h+-transporting atp synthase-like protein	483	1.46611e-33	0.711	P:metabolic process; P:cellular process; C:plastid; P:response to stress; P:response to biotic stimulus; P:generation of precursor metabolites and energy; P:photosynthesis; P:nucleobase-containing compound metabolic process; P:biosynthetic process; P:signal transduction; P:carbohydrate metabolic process; P:response to abiotic stimulus; P:transport; C:membrane; C:thylakoid; P:biological_process	-	4	0	3.13053	5.97349	25.1657	5.26086e-07	8.54322e-06
qs_c8618	f-box and wd40 domain	486	1.10602e-61	0.8515	F:kinase activity; P:post-embryonic development; P:cell cycle; P:cellular component organization; P:cellular process; P:cell growth; P:anatomical structure morphogenesis; P:cell differentiation; C:intracellular	EC:2.7.11.7	7	1	3.12421	6.70388	39.03	4.17348e-10	1.35323e-08
qs_c56316	pinus taeda anonymous locus 0_17010_02 genomic sequence	171	2.29533e-12	0.887	F:catalytic activity; P:carbohydrate metabolic process; P:cellular process; P:catabolic process; C:cytosol; F:nucleotide binding; C:cell wall; P:metabolic process; P:anatomical structure morphogenesis; P:cell differentiation; P:multicellular organismal development; P:cell growth; P:cellular component organization; P:biosynthetic process; C:nucleus	EC:1.1.1.22	10	2	3.11204	7.64334	63.0304	2.03537e-15	1.61771e-13
qs_c57893	dna-directed rna polymerases and iii subunit rpabc3-like	549	1.39533e-46	0.718	F:transferase activity; ; C:nucleoplasm; C:cytoplasm; C:plastid	EC:2.7.7.6	7	1	3.1008	6.68398	38.2289	6.29144e-10	2.00342e-08
qs_c69858	---NA---	162			-		4	0	3.09003	5.94032	24.2401	8.50422e-07	1.28895e-05
qs_c70587	hypothetical protein PRUPE_ppa026716mg	292	4.70025e-24	0.7485	F:molecular_function; P:biological_process; C:cellular_component		4	0	3.09003	5.94032	24.2401	8.50422e-07	1.28895e-05
qs_c73366	n-acetyl-l-glutamate synthase 2	351	3.70957e-27	0.949	C:cytoplasm; P:biosynthetic process; ; F:kinase activity; F:transferase activity	EC:2.7.2.8; EC:2.3.1.1	4	0	3.09003	5.94032	24.2401	8.50422e-07	1.28895e-05
qs_c76769	iron-sulfur assembly mitochondrial-like	146	1.99555e-14	0.991	P:cellular component organization; P:cellular process; P:catabolic process; P:transport; P:biosynthetic process; C:intracellular; F:binding; F:structural molecule activity	-	4	0	3.09003	5.94032	24.2401	8.50422e-07	1.28895e-05
qs_c78768	cold-inducible rna-binding protein	300	5.53478e-37	0.8355	F:nucleotide binding; F:RNA binding	-	4	0	3.09003	5.94032	24.2401	8.50422e-07	1.28895e-05
qs_c80584	1-acyl-sn-glycerol-3-phosphate acyltransferase	284	1.00387e-41	0.912	F:transferase activity; C:endoplasmic reticulum; P:metabolic process	EC:2.3.1.51	4	0	3.09003	5.94032	24.2401	8.50422e-07	1.28895e-05
qs_c89427	---NA---	109			-		4	0	3.09003	5.94032	24.2401	8.50422e-07	1.28895e-05
qs_c92049	uncharacterized rna pseudouridine synthase aq_1464-like	445	3.77891e-72	0.869	F:catalytic activity; C:plastid; P:nucleobase-containing compound metabolic process; F:RNA binding; P:cellular component organization; P:translation	EC:5.4.99.12	4	0	3.09003	5.94032	24.2401	8.50422e-07	1.28895e-05
qs_c94830	mediator of rna polymerase ii transcription subunit 20a-like	420	1.79649e-35	0.885	C:nucleoplasm;	-	4	0	3.09003	5.94032	24.2401	8.50422e-07	1.28895e-05
qs_rep_c56443	early-responsive to dehydration 2	620	1.0594e-46	0.7155	F:transferase activity; P:response to biotic stimulus; C:intracellular; P:response to abiotic stimulus; F:nucleotide binding; C:plastid; C:membrane; P:response to stress; C:nucleus	-	6	0	3.09003	5.94032	24.2401	8.50422e-07	1.28895e-05
qs_rep_c38166	probable n-acetyltransferase hookless 1	534	3.6189e-21	0.8505	F:transferase activity; P:anatomical structure morphogenesis; P:cellular component organization; P:cell growth; P:response to endogenous stimulus; P:signal transduction; P:metabolic process; P:post-embryonic development; P:response to abiotic stimulus	-	6	0	3.08919	6.46825	33.5786	6.84423e-09	1.73565e-07
qs_c8592	uncharacterized loc101206859	475	3.44508e-54	0.773	C:plastid; P:transport; P:cellular process; C:membrane; C:thylakoid	-	8	2	3.07615	7.61209	61.1895	5.18375e-15	3.78182e-13
qs_c10296	embryogenesis-associated protein emb8-like	473	9.64015e-37	0.8035	C:mitochondrion; F:hydrolase activity	EC:3.1.1.1	7	2	3.07166	7.14341	48.4851	3.32815e-12	1.5133e-10
qs_rep_c55059	60s ribosomal protein l30-like	311	1.64945e-59	0.994	C:ribosome; F:structural molecule activity; P:translation	-	8	1	3.06047	6.98979	44.5066	2.53507e-11	1.01155e-09
qs_c1577	u2 snrnp-associated surp motif-containing	1367	0	0.9425	P:carbohydrate metabolic process; P:cellular process; P:multicellular organismal development; F:RNA binding; P:cellular protein modification process; P:cell cycle; P:cellular component organization; P:anatomical structure morphogenesis; P:reproduction; P:post-embryonic development; P:nucleobase-containing compound metabolic process; P:catabolic process; P:biosynthetic process; F:nucleotide bindin…	-	43	6	3.04836	5.90638	23.3139	1.37601e-06	1.88798e-05
qs_c16612	cytidine deaminase-like	284	1.49408e-19	0.8245	P:nucleobase-containing compound metabolic process; P:catabolic process; F:hydrolase activity; F:binding	EC:3.5.4.5	11	1	3.04836	5.90638	23.3139	1.37601e-06	1.88798e-05
qs_c21369	aquaporin nip1-2	689	1.4359e-34	0.6625	P:transport; C:plasma membrane; P:biological_process; F:transporter activity; P:response to stress; C:membrane; C:endoplasmic reticulum	-	11	1	3.04836	5.90638	23.3139	1.37601e-06	1.88798e-05
qs_c21546	bifunctional aspartokinase homoserine chloroplastic-like	708	1.42329e-138	0.9405	P:biosynthetic process; ; P:metabolic process; F:catalytic activity; F:kinase activity; F:nucleotide binding; P:cellular process; C:plastid; F:binding	EC:1.1.1.3; EC:2.7.2.4	11	1	3.04836	5.90638	23.3139	1.37601e-06	1.88798e-05
qs_c68915	heat shock protein	417	3.16725e-59	0.862	F:nucleotide binding; P:response to stress	-	4	0	3.04836	5.90638	23.3139	1.37601e-06	1.88798e-05
qs_c69222	serine threonine-protein kinase sepa-like	367	1.2344e-27	0.908	C:cytosol; P:cellular component organization; P:cellular process; F:nucleotide binding; F:kinase activity; P:signal transduction; P:cellular protein modification process; P:multicellular organismal development; F:signal transducer activity; C:plasma membrane	EC:2.7.10.0; EC:2.7.11.25	4	0	3.04836	5.90638	23.3139	1.37601e-06	1.88798e-05
qs_c69368	ribonuclease h protein at1g65750-like	431	8.15589e-24	0.644	P:DNA metabolic process; F:nucleic acid binding; F:transferase activity	-	4	0	3.04836	5.90638	23.3139	1.37601e-06	1.88798e-05
qs_c69554	wall-associated receptor kinase 2-like	361	2.76321e-37	0.855	P:response to biotic stimulus; P:signal transduction; P:cellular protein modification process; C:cell wall; P:carbohydrate metabolic process; C:vacuole; F:carbohydrate binding; F:binding; P:response to stress; C:membrane; P:biological_process; P:anatomical structure morphogenesis; P:cellular component organization; P:cell growth; P:post-embryonic development; F:kinase activity; F:signal transduce…	EC:2.7.11.25	4	0	3.04836	5.90638	23.3139	1.37601e-06	1.88798e-05
qs_c69642	major facilitator protein	290	9.12657e-42	0.915	P:response to stress; P:response to abiotic stimulus	-	4	0	3.04836	5.90638	23.3139	1.37601e-06	1.88798e-05
qs_rep_c47598	non-specific lipid-transfer protein at2g13820-like	636	1.71448e-58	0.806	P:transport	-	6	0	3.04836	5.90638	23.3139	1.37601e-06	1.88798e-05
qs_rep_c47947	mitochondrial atp synthase subunit	574	1.03761e-23	0.921	C:membrane; C:mitochondrion	-	6	0	3.04836	5.90638	23.3139	1.37601e-06	1.88798e-05
qs_rep_c48929	low quality protein: myrcene chloroplastic- partial	599	1.01322e-89	0.795	P:response to endogenous stimulus; F:catalytic activity; P:biosynthetic process; P:cellular process; P:lipid metabolic process; P:secondary metabolic process; P:response to external stimulus; P:response to stress; P:response to biotic stimulus; F:binding; C:plastid; C:cytosol	EC:4.2.3.20; EC:4.2.3.14; EC:4.2.3.15; EC:4.2.3.16	6	0	3.04836	5.90638	23.3139	1.37601e-06	1.88798e-05
qs_rep_c52041	rpm1-interacting protein 4-like	626	5.71606e-34	0.7655	P:response to stress; P:cell death; P:response to biotic stimulus; P:cellular process; C:membrane	-	6	0	3.04836	5.90638	23.3139	1.37601e-06	1.88798e-05
qs_rep_c125791	nitrite reductase	731	9.13781e-99	0.81	F:catalytic activity; F:binding; P:biological_process; C:plastid; C:membrane; C:extracellular region; C:mitochondrion; P:metabolic process	EC:1.7.7.1	16	1	3.03275	6.42095	31.8963	1.62624e-08	3.73196e-07
qs_rep_c49599	methyl- -binding domain-containing protein 10-like	503	4.45138e-30	0.8745	C:nucleus; F:DNA binding	-	8	1	3.02206	6.957	43.0231	5.40967e-11	2.02624e-09
qs_rep_c60911	protein disulfide	454	7.5782e-28	0.853	P:response to stress; P:cellular process; C:plasma membrane; F:molecular_function; P:cellular homeostasis; P:metabolic process; C:membrane; C:vacuole; F:catalytic activity; C:plastid; F:transferase activity; C:endoplasmic reticulum; C:mitochondrion	EC:2.4.1.119	6	1	3.0199	7.09902	46.3458	9.912e-12	4.24069e-10
qs_rep_c41188	palmitoyl-protein thioesterase 1-like	624	1.66295e-33	0.867	C:vacuole; F:hydrolase activity; P:cellular protein modification process	EC:3.1.2.22	6	0	3.00545	5.87161	22.3874	2.22833e-06	2.9438e-05
qs_rep_c41266	glucan endo- -beta-glucosidase	598	8.84374e-77	0.9415	F:hydrolase activity; P:carbohydrate metabolic process; F:binding	EC:3.2.1.39	6	0	3.00545	5.87161	22.3874	2.22833e-06	2.9438e-05
qs_rep_c61751	6-phosphofructokinase 2-like	312	1.03707e-35	0.6165	F:transferase activity; C:cytosol	-	6	0	2.98045	6.76199	37.9691	7.18741e-10	2.1999e-08
qs_rep_c69578	aquaporin pip2-2-like	209	2.3816e-15	0.869	C:vacuole; P:response to stress; P:response to abiotic stimulus; P:transport; C:plasma membrane; P:response to endogenous stimulus; C:membrane; C:plastid; F:transporter activity	-	6	0	2.98045	6.76199	37.9691	7.18741e-10	2.1999e-08
qs_rep_c69745	calpain-type cysteine protease	317	2.23587e-41	0.7645	P:cell differentiation; P:reproduction; P:post-embryonic development; P:embryo development; C:intracellular; P:anatomical structure morphogenesis; P:cellular component organization; P:multicellular organismal development; P:cellular process; P:protein metabolic process; P:catabolic process; P:cell cycle; F:hydrolase activity; C:plasma membrane	-	6	0	2.98045	6.76199	37.9691	7.18741e-10	2.1999e-08
qs_rep_c41280	heat shock protein 70	444	2.62234e-42	0.939	P:response to biotic stimulus; C:cell wall; P:metabolic process; C:nucleolus; P:response to stress; P:response to abiotic stimulus; C:plastid; C:membrane; C:vacuole; F:protein binding; F:nucleotide binding; F:catalytic activity; P:biological_process; C:ribosome; C:plasma membrane; C:extracellular region	EC:1.3.1.74	5	0	2.974	6.37204	30.2091	3.87876e-08	8.464e-07
qs_rep_c46608	60s ribosomal protein l26-1-like	293	1.29837e-40	0.976	P:nucleobase-containing compound metabolic process; P:translation; C:nucleolus; P:response to stress; P:response to abiotic stimulus; F:structural molecule activity; C:membrane; C:vacuole; C:plastid; C:ribosome; C:cytosol; C:Golgi apparatus; C:plasma membrane	-	5	0	2.974	6.37204	30.2091	3.87876e-08	8.464e-07
qs_rep_c46867	endosomal protein	252	9.27041e-07	0.76	-		5	0	2.974	6.37204	30.2091	3.87876e-08	8.464e-07
qs_rep_c49919	nac domain containing protein 82	432	8.32059e-16	0.7505	P:response to stress; P:response to abiotic stimulus; P:signal transduction; P:response to endogenous stimulus; P:catabolic process; P:cellular process; P:secondary metabolic process; P:biosynthetic process; ; C:cytoplasm; F:protein binding; P:biological_process; F:sequence-specific DNA binding transcription factor activity; ; C:plasma membrane; C:nucleus	-	5	0	2.974	6.37204	30.2091	3.87876e-08	8.464e-07
qs_rep_c49942	squalene partial	349	2.5586e-47	0.9405	C:membrane; P:biosynthetic process; P:lipid metabolic process; F:transferase activity	EC:2.5.1.21	5	0	2.974	6.37204	30.2091	3.87876e-08	8.464e-07
qs_rep_c42919	bark storage protein a-like	753	1.81433e-123	0.81	P:nucleobase-containing compound metabolic process; F:catalytic activity	-	57	8	2.96309	8.26895	77.0255	1.68766e-18	1.89639e-16
qs_c16383	protein frigida-like	746	4.48734e-94	0.7855	-		10	1	2.96123	5.83599	21.4608	3.61134e-06	4.51463e-05
qs_c20188	homeobox-leucine zipper protein athb-40-like	769	4.1477e-61	0.717	F:sequence-specific DNA binding transcription factor activity; F:DNA binding; P:response to endogenous stimulus; C:nucleus;	-	10	1	2.96123	5.83599	21.4608	3.61134e-06	4.51463e-05
qs_c21008	f-box and wd40 domain	925	1.95296e-106	0.859	F:kinase activity; C:plasma membrane; P:transport; P:response to endogenous stimulus; F:nucleotide binding	EC:2.7.11.7	15	2	2.96123	5.83599	21.4608	3.61134e-06	4.51463e-05
qs_c70779	rna recognition motif-containing protein	533	3.13842e-28	0.7235	F:RNA binding; C:nucleus; P:nucleobase-containing compound metabolic process; F:nucleotide binding	-	4	0	2.96123	5.83599	21.4608	3.61134e-06	4.51463e-05
qs_c72876	pathogenesis-related protein 3	499	1.94912e-76	0.8545	F:hydrolase activity; P:response to endogenous stimulus; P:carbohydrate metabolic process; P:catabolic process; F:binding; C:cell wall; P:response to stress; P:response to abiotic stimulus	-	4	0	2.96123	5.83599	21.4608	3.61134e-06	4.51463e-05
qs_c75524	endoribonuclease dicer homolog 3a-like	499	1.33145e-23	0.723	F:RNA binding; F:hydrolase activity; C:intracellular; F:nucleotide binding; F:nuclease activity; P:nucleobase-containing compound metabolic process	EC:3.1.26.3	4	0	2.96123	5.83599	21.4608	3.61134e-06	4.51463e-05
qs_c77411	cellulose synthase-like protein e6-like	510	1.41282e-65	0.81	F:transferase activity; C:plasma membrane; P:biosynthetic process; P:carbohydrate metabolic process; P:cellular process; C:membrane; P:cellular component organization; C:endoplasmic reticulum	EC:2.4.1.12	4	0	2.96123	5.83599	21.4608	3.61134e-06	4.51463e-05
qs_c79001	protein phosphatase 2c 51	513	1.96028e-52	0.752	F:hydrolase activity; P:cellular protein modification process; F:nucleotide binding; F:kinase activity	EC:2.7.11.0	4	0	2.96123	5.83599	21.4608	3.61134e-06	4.51463e-05
qs_c8153	adenine guanine permease azg1-like	1077	1.15761e-130	0.802	P:transport; C:membrane; F:transporter activity; C:plastid	-	25	3	2.96123	5.83599	21.4608	3.61134e-06	4.51463e-05
qs_rep_c39605	serine threonine protein	588	8.78186e-120	0.95	F:hydrolase activity	EC:3.1.3.16	6	0	2.96123	5.83599	21.4608	3.61134e-06	4.51463e-05
qs_rep_c39871	probable wrky transcription factor 20-like	659	2.40684e-109	0.8095	F:sequence-specific DNA binding transcription factor activity; P:response to external stimulus; P:response to stress; F:DNA binding; P:response to endogenous stimulus;	-	6	0	2.96123	5.83599	21.4608	3.61134e-06	4.51463e-05
qs_c18046	hypothetical protein PRUPE_ppa013976mg	533	7.43466e-31	0.854	C:mitochondrion; P:response to stress	-	10	2	2.95659	7.29542	49.8306	1.6761e-12	8.1928e-11
qs_rep_c35691	limonoid udp-glucosyltransferase	844	1.67597e-53	0.896	P:response to abiotic stimulus; F:transferase activity; P:metabolic process; C:cytoplasm; P:biological_process	EC:2.4.1.120; EC:2.4.1.177; EC:2.4.1.210	42	5	2.95659	7.29542	49.8306	1.6761e-12	8.1928e-11
qs_rep_c52824	peptidase m20 m25 m40 family protein	780	1.75313e-150	0.8975	C:vacuole; C:Golgi apparatus; F:hydrolase activity; P:biosynthetic process; ; P:biological_process; P:nucleobase-containing compound metabolic process; P:protein metabolic process; P:catabolic process	EC:3.5.1.14	17	2	2.95174	6.55845	33.3912	7.53634e-09	1.89154e-07
qs_c11843	root phototropism protein 2-like	955	9.30929e-110	0.8745	P:multicellular organismal development; F:signal transducer activity; P:response to stress; P:response to abiotic stimulus; P:tropism; P:abscission; P:flower development; P:transport; P:cellular component organization; P:cellular process; P:anatomical structure morphogenesis; P:signal transduction; P:biosynthetic process; ; C:nucleus	-	19	3	2.9486	5.46825	16.6475	4.50095e-05	0.000425957
qs_c125888	short-chain dehydrogenase reductase 2	766	8.8694e-85	0.8165	F:nucleotide binding; P:metabolic process; C:plastid; F:catalytic activity	EC:1.1.1.189	8	1	2.9486	5.46825	16.6475	4.50095e-05	0.000425957
qs_c18104	pentatricopeptide repeat-containing protein	690	5.45387e-73	0.781	F:molecular_function; P:biological_process		15	2	2.94371	6.34695	29.364	5.9982e-08	1.25564e-06
qs_c16801	protein fez-like	508	9.00495e-78	0.8145	; F:DNA binding; P:response to endogenous stimulus; P:multicellular organismal development; P:cellular process; C:nucleus	-	10	2	2.94118	7.28224	49.1587	2.36064e-12	1.123e-10
qs_c19922	guanine nucleotide-binding protein alpha-2 subunit	623	1.03794e-21	0.494	P:biological_process	-	12	2	2.93473	6.72351	36.4138	1.59568e-09	4.63576e-08
qs_rep_c59086	carbamoyl-phosphate synthase large chain-like	364	6.22361e-10	0.7573	P:cellular component organization; P:cellular process; P:response to extracellular stimulus; P:cell communication; P:response to stress; P:biosynthetic process; P:carbohydrate metabolic process; C:membrane; P:cellular protein modification process; P:protein metabolic process; P:catabolic process; C:cytoplasm; P:regulation of gene expression, epigenetic; ; ; C:cytosol; F:binding; C:plastid; F:cata…	EC:6.3.5.5	6	0	2.93473	6.72351	36.4138	1.59568e-09	4.63576e-08
qs_rep_c59499	golgin candidate 5	400	5.13934e-29	0.943	P:cellular component organization; P:cellular process; P:cell cycle; P:transport; C:Golgi apparatus; F:protein binding; C:nucleus	-	6	0	2.93473	6.72351	36.4138	1.59568e-09	4.63576e-08
qs_rep_c35865	protein rer1b-like	912	1.42254e-100	0.8765	C:membrane; C:endoplasmic reticulum; P:transport; P:cellular process; C:Golgi apparatus	-	24	3	2.92533	6.53643	32.5804	1.14361e-08	2.77763e-07
qs_rep_c38174	transmembrane protein 87b-like	328	8.57116e-16	0.674	C:membrane; C:Golgi apparatus	-	5	0	2.91277	6.32141	28.5179	9.28342e-08	1.84087e-06
qs_rep_c38406	hypersensitive-induced response protein 2-like	371	1.79483e-54	0.847	F:protein binding; C:membrane; C:vacuole	-	5	0	2.91277	6.32141	28.5179	9.28342e-08	1.84087e-06
qs_rep_c38580	sucrose synthase 1	288	6.91947e-34	0.93	F:transferase activity; P:biosynthetic process; P:carbohydrate metabolic process; P:cellular process	EC:2.4.1.13	5	0	2.91277	6.32141	28.5179	9.28342e-08	1.84087e-06
qs_rep_c38589	cellulose synthase-like protein e1	139	2.79014e-07	0.8775	P:transport; C:membrane; P:biosynthetic process; P:carbohydrate metabolic process; P:cellular process; P:cellular component organization; F:transferase activity; ; C:endoplasmic reticulum; C:plasma membrane	EC:2.4.1.12	5	0	2.91277	6.32141	28.5179	9.28342e-08	1.84087e-06
qs_rep_c38644	3-hydroxyisobutyryl- hydrolase-like protein	230	3.90789e-17	0.843	F:hydrolase activity; P:metabolic process; F:catalytic activity; C:membrane	EC:4.2.1.17	5	0	2.91277	6.32141	28.5179	9.28342e-08	1.84087e-06
qs_rep_c39181	5 -3 exoribonuclease 3-like	218	4.3475e-20	0.7705	F:nuclease activity; F:nucleic acid binding; P:nucleobase-containing compound metabolic process; P:catabolic process; C:nucleus; F:binding	-	5	0	2.91277	6.32141	28.5179	9.28342e-08	1.84087e-06
qs_rep_c40015	proline-rich receptor-like protein kinase perk8-like	400	2.95003e-66	0.9105	F:nucleotide binding; P:cellular protein modification process; P:signal transduction; F:kinase activity; F:signal transducer activity; C:plasma membrane	EC:2.7.11.25	5	0	2.91277	6.32141	28.5179	9.28342e-08	1.84087e-06
qs_rep_c40335	potassium transporter 4-like	247	1.99356e-07	0.8211	F:transporter activity; P:biosynthetic process; P:cellular process; P:lipid metabolic process; P:carbohydrate metabolic process; P:secondary metabolic process; P:response to extracellular stimulus; P:cell communication; P:response to stress; C:membrane	-	5	0	2.91277	6.32141	28.5179	9.28342e-08	1.84087e-06
qs_rep_c48814	aquaporin pip2-7	701	2.24156e-101	0.9635	C:vacuole; C:plasma membrane; P:transport; P:cellular process; P:response to endogenous stimulus; C:membrane; C:nucleus; F:transporter activity	-	14	1	2.91277	6.32141	28.5179	9.28342e-08	1.84087e-06
qs_rep_c54465	6-phosphofructokinase 3-like	628	3.07907e-47	0.9655	C:plasma membrane; P:metabolic process; P:cellular process; F:kinase activity; C:cytosol; F:nucleotide binding; P:carbohydrate metabolic process; P:generation of precursor metabolites and energy; P:catabolic process	EC:2.7.1.11	8	1	2.91277	6.32141	28.5179	9.28342e-08	1.84087e-06
qs_rep_c69831	probable wrky transcription factor 70-like	355	3.28556e-19	0.809	F:sequence-specific DNA binding transcription factor activity; F:DNA binding;	-	5	0	2.91277	6.32141	28.5179	9.28342e-08	1.84087e-06
qs_rep_c60361	amino acid transporter	482	1.54825e-11	0.911	C:vacuole; C:membrane; C:plasma membrane	-	5	0	2.88753	6.68398	34.8535	3.55461e-09	9.62601e-08
qs_rep_c64523	calcium-dependent protein kinase 8-like	444	1.21011e-17	0.922	F:kinase activity; F:binding; P:cellular protein modification process; F:nucleotide binding	EC:2.7.11.17	5	0	2.88753	6.68398	34.8535	3.55461e-09	9.62601e-08
qs_rep_c68517	60s ribosomal protein l4-like	270	0.00361386	0.866	C:ribosome; F:structural molecule activity; P:translation	-	5	0	2.88753	6.68398	34.8535	3.55461e-09	9.62601e-08
qs_c10447	mitogen-activated protein kinase kinase kinase anp1-like	536	1.0259e-09	0.662	F:ATP binding; F:protein kinase activity; F:nucleotide binding; P:protein phosphorylation; F:transferase activity, transferring phosphorus-containing groups; C:plasma membrane		6	1	2.88115	6.29542	27.6712	1.43791e-07	2.72159e-06
qs_rep_c36003	cullin 4	442	5.52517e-78	0.9015	P:cellular protein modification process; P:cell cycle; P:embryo development; P:response to stress; P:response to abiotic stimulus; C:intracellular; P:reproduction; P:post-embryonic development; P:response to endogenous stimulus; P:signal transduction; P:cellular process; C:cytosol; P:protein metabolic process; P:catabolic process; P:biological_process; P:nucleobase-containing compound metabolic p…	-	23	3	2.87204	6.97349	40.5777	1.88952e-10	6.44746e-09
qs_c24237	cytosolic invertase 2	602	9.88141e-09	0.6577	P:multicellular organismal development; F:hydrolase activity; P:carbohydrate metabolic process; P:cellular process; P:catabolic process; C:intracellular	EC:3.2.1.26	6	1	2.8685	5.76199	19.6088	9.50291e-06	0.000107524
qs_c3517	paladin-like	2296	0	0.863	C:cytosol	-	114	26	2.8685	5.76199	19.6088	9.50291e-06	0.000107524
qs_c9263	rna-binding protein 5 10	1040	3.80762e-70	0.8765	P:regulation of gene expression, epigenetic; P:cellular component organization; ; F:binding; F:nucleotide binding; P:cellular protein modification process; P:post-embryonic development; P:nucleobase-containing compound metabolic process; P:catabolic process; F:nucleic acid binding; C:nucleus; P:response to stress; P:response to biotic stimulus	-	23	3	2.8685	5.76199	19.6088	9.50291e-06	0.000107524
qs_rep_c36076	protein-l-isoaspartate o-methyltransferase-like	492	4.6459e-42	0.8005	P:metabolic process; P:cellular process; P:cellular protein modification process; F:transferase activity	EC:2.1.1.77	22	3	2.8685	5.76199	19.6088	9.50291e-06	0.000107524
qs_rep_c43981	allene oxide cyclase chloroplastic-like	941	9.21528e-72	0.896	C:plastid; P:response to stress; P:response to abiotic stimulus; F:catalytic activity; C:plasma membrane; C:membrane; C:thylakoid; P:response to biotic stimulus	EC:5.3.99.6	23	3	2.8685	5.76199	19.6088	9.50291e-06	0.000107524
qs_c6367	PREDICTED: uncharacterized protein LOC101302343	1242	6.88649e-50	0.6695	-		47	8	2.85677	6.03762	23.3186	1.37266e-06	1.88798e-05
qs_rep_c35628	protein	513	1.40022e-53	0.969	-		28	6	2.85192	8.96527	92.7844	5.83129e-22	1.02715e-19
qs_c23451	xyloglucanase 113	732	3.88346e-145	0.933	P:biosynthetic process; P:cellular protein modification process; P:carbohydrate metabolic process; P:cellular component organization; P:cellular process; C:Golgi apparatus; C:endoplasmic reticulum	-	14	2	2.84881	6.26895	26.8238	2.22879e-07	4.0537e-06
qs_rep_c37570	nac domain-containing protein 29-like	390	4.7402e-35	0.8155	F:DNA binding;	-	8	1	2.84881	6.26895	26.8238	2.22879e-07	4.0537e-06
qs_rep_c49790	---NA---	510			-		5	0	2.84881	6.26895	26.8238	2.22879e-07	4.0537e-06
qs_rep_c49840	tyrosine specific protein phosphatase family protein	496	1.02322e-23	0.8085	P:signal transduction; C:intracellular; P:metabolic process; F:hydrolase activity	EC:3.1.3.48	5	0	2.84881	6.26895	26.8238	2.22879e-07	4.0537e-06
qs_rep_c49911	alba dna rna-binding protein	477	2.19455e-47	0.9535	F:nucleic acid binding	-	5	0	2.84881	6.26895	26.8238	2.22879e-07	4.0537e-06
qs_rep_c50084	uncharacterized loc101203509	490	4.45185e-44	0.8045	C:vacuole; F:hydrolase activity	EC:3.2.1.22	5	0	2.84881	6.26895	26.8238	2.22879e-07	4.0537e-06
qs_rep_c52235	4-coumarate: ligase	516	4.31115e-25	0.693	F:nucleotide binding; F:catalytic activity; ; P:secondary metabolic process	EC:6.2.1.12	5	0	2.84881	6.26895	26.8238	2.22879e-07	4.0537e-06
qs_rep_c52499	gdp-l-galactose phosphorylase 1-like	499	2.72336e-86	0.9175	F:transferase activity; P:response to endogenous stimulus; P:biological_process; P:response to stress; P:response to biotic stimulus; P:response to abiotic stimulus; P:cellular component organization; P:cellular process; P:biosynthetic process	EC:2.7.7.22	5	0	2.84881	6.26895	26.8238	2.22879e-07	4.0537e-06
qs_c4229	gem-like protein 5-like	614	8.27429e-44	0.8615	P:response to stress; P:response to abiotic stimulus	-	11	2	2.83872	6.64334	33.2888	7.94382e-09	1.97857e-07
qs_rep_c35483	---NA---	126			-		23	3	2.83258	6.94032	39.1226	3.9801e-10	1.29267e-08
qs_rep_c51341	uncharacterized partial	539	5.17792e-80	0.7995	C:intracellular; C:cytoplasm	-	10	2	2.82548	7.3967	49.2541	2.2486e-12	1.07756e-10
qs_c18689	receptor-like serine threonine-protein kinase ale2-like	558	7.7289e-64	0.815	F:kinase activity; C:plasma membrane; P:cellular protein modification process; F:nucleotide binding	EC:2.7.10.2; EC:2.7.11.0	6	1	2.81979	5.72351	18.6842	1.54259e-05	0.000166542
qs_c19130	dolichyl-phosphate beta-glucosyltransferase	497	7.02734e-71	0.885	P:biosynthetic process; P:cellular process; P:lipid metabolic process; F:transferase activity; P:cellular protein modification process; P:carbohydrate metabolic process; C:extracellular region; C:endoplasmic reticulum	EC:2.4.1.117	9	1	2.81979	5.72351	18.6842	1.54259e-05	0.000166542
qs_c20677	protein	693	5.48079e-34	0.6665	P:malate transport; P:malate transmembrane transport; F:malate transmembrane transporter activity		9	1	2.81979	5.72351	18.6842	1.54259e-05	0.000166542
qs_c23960	disease resistance rpp8-like protein	560	3.41938e-25	0.653	F:hydrolase activity; F:nucleotide binding	-	6	1	2.81979	5.72351	18.6842	1.54259e-05	0.000166542
qs_c2430	---NA---	255			-		30	4	2.81737	6.00591	22.4343	2.17458e-06	2.89234e-05
qs_c56892	hypothetical protein VITISV_012210	568	7.6391e-17	0.6675	F:hydrolase activity; F:binding; P:metabolic process	EC:3.2.1.0	7	1	2.81737	6.00591	22.4343	2.17458e-06	2.89234e-05
qs_c2319	a1 cistron-splicing factor aar2	900	2.59161e-107	0.8455	P:protein metabolic process; P:cellular process; P:response to abiotic stimulus; P:response to stress; P:cell cycle; P:nucleobase-containing compound metabolic process	-	20	3	2.81574	6.24198	25.976	3.45697e-07	5.91344e-06
qs_c25094	tyrosine decarboxylase	523	4.70149e-46	0.869	F:binding; P:response to external stimulus; P:response to stress; C:cytoplasm; ; F:catalytic activity	EC:4.1.1.28	6	1	2.81457	6.4448	29.3275	6.11229e-08	1.27815e-06
qs_c24657	probable serine threonine-protein kinase wnk4-like	477	3.97716e-15	0.5725	F:transferase activity	-	6	1	2.81299	6.78084	35.5227	2.52096e-09	7.06156e-08
qs_c4815	protein	326	8.85109e-35	0.887	F:binding; F:nucleic acid binding	-	7	1	2.79201	6.90638	37.6629	8.40874e-10	2.55291e-08
qs_rep_c39262	btb poz and math domain-containing protein 4-like	525	2.44097e-58	0.851	P:response to stress; P:response to abiotic stimulus; P:cellular process; F:protein binding; P:response to extracellular stimulus; P:cell communication; C:nucleus; C:cytosol	-	5	0	2.78189	6.2145	25.1279	5.36516e-07	8.60538e-06
qs_rep_c39843	acetyl-coenzyme a carboxylase carboxyl transferase subunit alpha	494	9.10399e-19	0.6325	F:catalytic activity; C:plastid; P:biosynthetic process; P:cellular process; P:metabolic process; C:membrane	-	5	0	2.78189	6.2145	25.1279	5.36516e-07	8.60538e-06
qs_rep_c45388	hypothetical protein PRUPE_ppa003121mg	521	1.71349e-60	0.814	C:nucleus; C:plasma membrane; C:endoplasmic reticulum	-	5	0	2.78189	6.2145	25.1279	5.36516e-07	8.60538e-06
qs_rep_c45552	ras-like protein	503	2.74364e-49	0.92	F:nucleotide binding; C:plasma membrane; C:membrane; C:vacuole; P:signal transduction; P:response to endogenous stimulus; P:transport	-	5	0	2.78189	6.2145	25.1279	5.36516e-07	8.60538e-06
qs_rep_c46534	signal peptide peptidase-like 1-like	502	3.8838e-81	0.87	C:membrane; C:Golgi apparatus; C:endosome; F:hydrolase activity	EC:3.4.23.0	5	0	2.78189	6.2145	25.1279	5.36516e-07	8.60538e-06
qs_rep_c47809	glutelin type-a 1-like	502	6.33171e-68	0.9185	F:binding; F:molecular_function	-	5	0	2.78189	6.2145	25.1279	5.36516e-07	8.60538e-06
qs_rep_c52104	cytosolic malate dehydrogenase	471	1.4856e-44	0.9685	F:catalytic activity; P:response to stress; P:response to abiotic stimulus; F:transferase activity; P:metabolic process; P:cellular process; P:generation of precursor metabolites and energy; P:catabolic process; C:membrane; C:vacuole; P:carbohydrate metabolic process; F:nucleotide binding; C:plastid; P:biological_process; C:nucleus; C:plasma membrane; C:extracellular region	EC:1.1.1.37	4	0	2.78189	6.2145	25.1279	5.36516e-07	8.60538e-06
qs_rep_c52430	cysteine-rich receptor-like protein kinase	457	7.79671e-51	0.846	F:receptor activity; F:kinase activity; F:carbohydrate binding; P:cellular protein modification process; F:nucleotide binding	EC:2.7.10.2; EC:2.7.11.0	4	0	2.78189	6.2145	25.1279	5.36516e-07	8.60538e-06
qs_rep_c53587	probable histone-arginine methyltransferase -like	450	2.42814e-60	0.9	F:transferase activity; P:cellular component organization; P:cellular protein modification process	EC:2.1.1.125	4	0	2.78189	6.2145	25.1279	5.36516e-07	8.60538e-06
qs_rep_c54567	40s ribosomal protein s8-like	444	1.32733e-58	0.9915	C:nucleolus; C:ribosome; F:structural molecule activity; C:plasma membrane; C:cell wall; C:plastid; P:translation	-	4	0	2.78189	6.2145	25.1279	5.36516e-07	8.60538e-06
qs_rep_c54969	eukaryotic translation initiation factor 3 subunit m-like	460	9.92973e-45	0.8695	P:reproduction; P:cell differentiation; P:multicellular organismal development; P:cellular component organization; P:cellular protein modification process; C:intracellular; P:cell cycle; P:response to stress; P:DNA metabolic process; P:flower development; P:catabolic process	-	4	0	2.78189	6.2145	25.1279	5.36516e-07	8.60538e-06
qs_c13357	prostaglandin g h synthase 2-like	612	7.38616e-83	0.912	P:response to stress; F:binding; P:biological_process; F:catalytic activity; P:cell death; P:catabolic process; P:cellular process; P:lipid metabolic process	EC:1.11.1.7; EC:1.13.11.12	6	1	2.76939	5.68398	17.7609	2.50475e-05	0.000255867
qs_c15564	pentatricopeptide repeat-containing protein at3g14730-like	725	1.49246e-126	0.7775	F:molecular_function; P:biological_process; C:cellular_component		9	1	2.76939	5.68398	17.7609	2.50475e-05	0.000255867
qs_c3549	leucoanthocyanidin	1117	0	0.859	P:catabolic process; P:cellular process; P:secondary metabolic process; P:biological_process; P:response to external stimulus; P:response to stress; P:cell death; F:catalytic activity; P:biosynthetic process; ; P:metabolic process	EC:1.13.11.0; EC:1.14.11.19	22	3	2.76939	5.68398	17.7609	2.50475e-05	0.000255867
qs_c3850	protein transparent testa 12-like	1121	1.7426e-125	0.8045	P:transport; P:cellular process; C:membrane; F:transporter activity	-	22	3	2.76939	5.68398	17.7609	2.50475e-05	0.000255867
qs_rep_c56455	importin subunit alpha-1-like	636	2.03609e-118	0.9445	C:nucleolus; P:transport; P:cellular process; C:cell wall; C:nuclear envelope; F:transporter activity; C:cytosol	-	5	0	2.76939	5.68398	17.7609	2.50475e-05	0.000255867
qs_rep_c57768	probable beta- -galactosyltransferase 10-like	655	6.49346e-103	0.9115	P:biosynthetic process; ; F:transferase activity; C:membrane; P:cellular protein modification process; P:carbohydrate metabolic process; P:nucleobase-containing compound metabolic process; C:Golgi apparatus	EC:2.4.1.134	5	0	2.76939	5.68398	17.7609	2.50475e-05	0.000255867
qs_rep_c60148	hypothetical protein PRUPE_ppa002808mg	611	0.000445522	0.515	-		5	0	2.76939	5.68398	17.7609	2.50475e-05	0.000255867
qs_rep_c60985	12-oxophytodienoate reductase 2-like	613	9.26535e-90	0.9035	P:response to external stimulus; P:response to stress; P:biological_process; F:catalytic activity; P:cellular process; P:lipid metabolic process; F:nucleotide binding; P:metabolic process	EC:1.3.1.42	5	0	2.76939	5.68398	17.7609	2.50475e-05	0.000255867
qs_rep_c61134	protein	583	4.29163e-88	0.9465	F:hydrolase activity	EC:3.1.3.16	5	0	2.76939	5.68398	17.7609	2.50475e-05	0.000255867
qs_rep_c71389	senescence-associated family protein	426	1.37655e-10	0.548	C:nucleus		5	0	2.76939	5.68398	17.7609	2.50475e-05	0.000255867
qs_rep_c83317	eukaryotic translation initiation factor 3 subunit c-like	572	4.97496e-103	0.9235	C:cytoplasm; P:translation; F:protein binding; F:translation factor activity, nucleic acid binding; C:nucleus; C:cytosol; C:mitochondrion	-	5	0	2.76939	5.68398	17.7609	2.50475e-05	0.000255867
qs_rep_c41893	caffeic acid o-methyltransferase	516	1.23504e-22	0.964	F:transferase activity; P:biosynthetic process; ; P:secondary metabolic process; F:protein binding; P:metabolic process; P:cellular process	EC:2.1.1.68	7	1	2.76728	6.74288	34.0086	5.48679e-09	1.40232e-07
qs_rep_c44993	probable nitrite transporter at1g68570-like	538	2.56073e-84	0.8525	C:membrane; P:transport; F:transporter activity	-	7	1	2.76728	6.74288	34.0086	5.48679e-09	1.40232e-07
qs_rep_c34605	zinc finger protein	893	5.04034e-92	0.8105	F:DNA binding; C:intracellular; F:protein binding; F:binding	-	46	7	2.76666	7.34695	46.6845	8.33844e-12	3.59104e-10
qs_c23255	mate efflux family protein alf5-like	520	1.10326e-29	0.8135	P:transport; P:cellular process; C:membrane; F:transporter activity	-	6	1	2.75582	6.3967	27.6967	1.41903e-07	2.68846e-06
qs_rep_c52518	selenoprotein t	397	6.38766e-28	0.625	P:cell redox homeostasis; F:selenium binding; C:endoplasmic reticulum; C:plasma membrane		5	0	2.75582	6.3967	27.6967	1.41903e-07	2.68846e-06
qs_rep_c53209	gtp pyrophosphokinase	266	3.69502e-12	0.6825	P:response to external stimulus; P:response to stress; P:metabolic process; P:cellular process; F:transporter activity; C:plastid; F:transferase activity; P:signal transduction; P:response to abiotic stimulus; P:response to endogenous stimulus	EC:2.7.6.5	5	0	2.75582	6.3967	27.6967	1.41903e-07	2.68846e-06
qs_c5049	---NA---	459			-		19	3	2.74723	6.18648	24.2797	8.33109e-07	1.28895e-05
qs_rep_c38060	aminoacrylate hydrolase	499	8.27261e-56	0.883	F:hydrolase activity; C:external encapsulating structure; C:extracellular region	-	5	0	2.74723	6.18648	24.2797	8.33109e-07	1.28895e-05
qs_rep_c38798	lacasse diphenol oxidase	528	3.9169e-13	0.789	F:binding; F:catalytic activity; C:extracellular region; P:catabolic process; ; P:secondary metabolic process; P:metabolic process	EC:1.10.3.2; EC:1.10.3.3	5	0	2.74723	6.18648	24.2797	8.33109e-07	1.28895e-05
qs_rep_c38800	fad nad binding	507	4.50731e-57	0.9145	F:molecular_function; P:biological_process		5	0	2.74723	6.18648	24.2797	8.33109e-07	1.28895e-05
qs_rep_c47762	cysteine protease component of protease-inhibitor complex	492	4.93294e-07	0.768	C:vacuole; P:carbohydrate metabolic process; P:cellular component organization; P:cellular process; F:protein binding; F:catalytic activity; C:plastid; P:protein metabolic process; P:catabolic process; C:cytosol; C:extracellular region; P:response to stress; P:response to abiotic stimulus; F:hydrolase activity; P:metabolic process	EC:1.3.1.74	4	0	2.74723	6.18648	24.2797	8.33109e-07	1.28895e-05
qs_rep_c47904	---NA---	131			-		4	0	2.74723	6.18648	24.2797	8.33109e-07	1.28895e-05
qs_rep_c47993	prolyl oligopeptidase-like protein	485	5.78638e-38	0.8525	F:hydrolase activity; P:transport; P:cellular process; P:biosynthetic process; P:carbohydrate metabolic process; C:plastid; P:protein metabolic process; P:catabolic process; C:cytosol	EC:3.4.21.0; EC:3.4.21.0	4	0	2.74723	6.18648	24.2797	8.33109e-07	1.28895e-05
qs_rep_c50403	cathepsin b-like	487	6.25481e-58	0.883	C:cytosol; C:vacuole; P:protein metabolic process; P:catabolic process; P:biological_process; F:hydrolase activity	EC:3.4.22.0	4	0	2.74723	6.18648	24.2797	8.33109e-07	1.28895e-05
qs_rep_c50824	aquaporin	488	2.19274e-14	0.565	P:water transport; C:integral to membrane; C:membrane; P:transmembrane transport; P:transport; F:transporter activity; F:water channel activity		4	0	2.74723	6.18648	24.2797	8.33109e-07	1.28895e-05
qs_c11704	protein transport protein sec61 subunit beta-like	485	2.22753e-10	0.985	-		6	1	2.74387	6.72351	33.2503	8.10288e-09	2.01306e-07
qs_c4718	uncharacterized loc101206733	924	2.31712e-25	0.884	F:nucleic acid binding; F:protein binding	-	12	2	2.71716	5.64334	16.8396	4.06751e-05	0.000392537
qs_rep_c42296	probable lrr receptor-like serine threonine-protein kinase at1g53440-like	454	2.27105e-08	0.7085	P:cellular protein modification process; F:kinase activity; F:catalytic activity; P:cellular process	EC:2.7.11.0	4	0	2.71172	6.15791	23.4317	1.29425e-06	1.85931e-05
qs_rep_c42305	serine carboxypeptidase-like 18	481	1.40226e-46	0.674	F:hydrolase activity	-	4	0	2.71172	6.15791	23.4317	1.29425e-06	1.85931e-05
qs_rep_c44318	at3g15480 mjk13_14	464	3.41692e-31	0.81	C:plasma membrane; P:biosynthetic process; P:carbohydrate metabolic process; P:cellular process	-	4	0	2.71172	6.15791	23.4317	1.29425e-06	1.85931e-05
qs_rep_c45539	endoplasmin homolog	493	2.69991e-47	0.924	C:membrane; C:vacuole; P:biosynthetic process; P:cellular protein modification process; P:carbohydrate metabolic process; P:cellular process; P:anatomical structure morphogenesis; P:multicellular organismal development; C:extracellular region; P:protein metabolic process; P:response to stress; P:transport; P:response to abiotic stimulus; C:endoplasmic reticulum; P:growth; P:cellular component org…	-	4	0	2.71172	6.15791	23.4317	1.29425e-06	1.85931e-05
qs_rep_c46426	laccase-4-like	486	1.97107e-74	0.915	F:binding; P:cellular process; F:catalytic activity; C:extracellular region; P:catabolic process; ; P:secondary metabolic process; P:metabolic process	EC:1.10.3.2; EC:1.10.3.3	4	0	2.71172	6.15791	23.4317	1.29425e-06	1.85931e-05
qs_rep_c47719	ruvb-like 1-like	476	2.05789e-12	0.913	P:cell cycle; P:cellular component organization; P:cellular process; P:biosynthetic process; P:carbohydrate metabolic process; F:protein binding; F:binding; P:nucleobase-containing compound metabolic process; P:protein metabolic process; P:catabolic process; C:plastid; P:cellular protein modification process; P:response to abiotic stimulus; P:post-embryonic development; C:nucleolus; C:cytosol; P:…	-	4	0	2.71172	6.15791	23.4317	1.29425e-06	1.85931e-05
qs_rep_c47723	14-3-3 protein	460	1.23465e-66	0.9435	C:vacuole; F:protein binding; P:biological_process; C:plasma membrane; C:plastid; C:nucleus; C:cytosol; C:extracellular region; P:signal transduction; P:response to endogenous stimulus	-	4	0	2.71172	6.15791	23.4317	1.29425e-06	1.85931e-05
qs_c16454	cytochrome p450	512	1.28684e-55	0.78	F:binding; F:catalytic activity; F:molecular_function; P:metabolic process	EC:1.14.13.88	6	1	2.69459	6.34695	26.0645	3.30198e-07	5.81157e-06
qs_rep_c36061	predicted protein	845	0.00212304	0.7333	F:metal ion binding; P:metal ion transport		20	3	2.69459	6.34695	26.0645	3.30198e-07	5.81157e-06
qs_c15042	predicted protein	532	1.68231e-15	0.63	-		9	2	2.6878	7.06865	38.932	4.38835e-10	1.41353e-08
qs_c22711	tetratricopeptide repeat -containing protein	586	2.38987e-71	0.841	P:biosynthetic process; P:carbohydrate metabolic process; P:cellular process; P:translation; F:DNA binding; C:plasma membrane; P:protein metabolic process; P:catabolic process; P:cellular component organization; F:translation factor activity, nucleic acid binding; C:plastid; C:cytosol	-	14	3	2.6878	7.06865	38.932	4.38835e-10	1.41353e-08
qs_c1512	wd repeat-containing protein 5-like	927	2.84647e-154	0.8865	F:kinase activity; C:intracellular; F:nucleotide binding; C:plasma membrane	EC:2.7.11.7	24	4	2.68154	6.51406	28.5746	9.01563e-08	1.81165e-06
qs_c18219	galactosyltransferase family protein	635	8.56257e-111	0.8865	C:Golgi apparatus; F:transferase activity; P:biosynthetic process; P:cellular protein modification process; P:carbohydrate metabolic process; C:membrane	-	10	2	2.68154	6.51406	28.5746	9.01563e-08	1.81165e-06
qs_c9488	ankyrin repeat-containing	523	1.6412e-21	0.595	-		6	1	2.68154	6.51406	28.5746	9.01563e-08	1.81165e-06
qs_rep_c66465	protein	419	3.28708e-09	0.7588	F:molecular_function; P:biological_process		5	0	2.68154	6.51406	28.5746	9.01563e-08	1.81165e-06
qs_rep_c66717	u6 snrna-associated sm-like protein lsm7	418	2.13113e-20	0.8555	C:nucleus; C:intracellular	-	5	0	2.68154	6.51406	28.5746	9.01563e-08	1.81165e-06
qs_rep_c69184	polypyrimidine tract-binding protein 3	325	1.19754e-33	0.9115	P:nucleobase-containing compound metabolic process; F:RNA binding; P:metabolic process; P:translation; C:cytoplasm; F:nucleotide binding; F:catalytic activity; C:nucleus	EC:1.3.1.74	5	0	2.68154	6.51406	28.5746	9.01563e-08	1.81165e-06
qs_rep_c70975	translation factor sui1	295	5.20192e-46	0.928	P:translation; F:translation factor activity, nucleic acid binding	-	5	0	2.68154	6.51406	28.5746	9.01563e-08	1.81165e-06
qs_rep_c73710	ankyrin repeat family protein	128	0.0135617	0.785	-		5	0	2.68154	6.51406	28.5746	9.01563e-08	1.81165e-06
qs_rep_c77464	syntaxin-related protein nt-syr1	404	5.49401e-36	0.8775	P:cellular component organization; P:cellular process; F:protein binding; C:intracellular; C:plasma membrane; P:transport; P:response to endogenous stimulus	-	5	0	2.68154	6.51406	28.5746	9.01563e-08	1.81165e-06
qs_rep_c38245	translational activator gcn1	461	1.86817e-14	1	P:transport; P:cellular process; C:cytosol; P:protein metabolic process; P:catabolic process; P:response to stress; P:response to biotic stimulus; P:cellular component organization; C:membrane; C:cytoplasm; P:biosynthetic process; P:carbohydrate metabolic process	-	4	0	2.67531	6.12877	22.5841	2.01142e-06	2.68812e-05
qs_rep_c38342	low quality protein: uncharacterized short-chain type dehydrogenase reductase y4vi-like	465	3.34608e-28	0.526	P:oxidation-reduction process; F:oxidoreductase activity; P:metabolic process; F:nucleotide binding; F:tropine dehydrogenase activity; P:response to cadmium ion; P:response to karrikin		4	0	2.67531	6.12877	22.5841	2.01142e-06	2.68812e-05
qs_rep_c38920	nodulin 21 -like transporter family protein	478	2.97393e-29	0.756	C:membrane	-	4	0	2.67531	6.12877	22.5841	2.01142e-06	2.68812e-05
qs_rep_c39390	transcription factor myb39-like	584	1.5293e-65	0.939	P:response to endogenous stimulus; P:biological_process; F:DNA binding	-	7	1	2.67531	6.12877	22.5841	2.01142e-06	2.68812e-05
qs_rep_c39768	acetate-- ligase chloroplastic glyoxysomal-like	461	2.77471e-42	0.9335	F:nucleotide binding; C:plastid; F:catalytic activity; P:metabolic process; P:cellular process; C:cytosol	EC:6.2.1.1	4	0	2.67531	6.12877	22.5841	2.01142e-06	2.68812e-05
qs_rep_c40066	glutathione s-	449	3.07677e-26	0.7295	F:catalytic activity	-	4	0	2.67531	6.12877	22.5841	2.01142e-06	2.68812e-05
qs_rep_c40150	choline ethanolamine kinase	605	2.18954e-88	0.7715	F:kinase activity; P:metabolic process; P:cellular process	EC:2.7.1.32	7	1	2.67531	6.12877	22.5841	2.01142e-06	2.68812e-05
qs_rep_c40245	fmn binding protein	476	1.35879e-36	0.9485	F:nucleotide binding; F:catalytic activity; P:metabolic process	EC:1.4.3.5	4	0	2.67531	6.12877	22.5841	2.01142e-06	2.68812e-05
qs_rep_c40297	potassium transporter	445	4.20987e-26	0.946	P:multicellular organismal development; F:transporter activity; C:plasma membrane	-	4	0	2.67531	6.12877	22.5841	2.01142e-06	2.68812e-05
qs_rep_c40442	probable not transcription complex subunit vip2-like	473	3.57784e-23	0.8275	P:cell cycle; F:protein binding; ; P:DNA metabolic process; C:nucleus	-	4	0	2.67531	6.12877	22.5841	2.01142e-06	2.68812e-05
qs_rep_c41667	pto kinase interactor	461	5.81284e-25	0.989	P:response to stress; F:nucleotide binding; F:kinase activity; P:signal transduction; P:cellular protein modification process; F:signal transducer activity	EC:2.7.10.0; EC:2.7.11.25	4	0	2.67531	6.12877	22.5841	2.01142e-06	2.68812e-05
qs_rep_c43367	wound-induced protein win2	179	3.69577e-07	0.899	P:response to stress; P:response to biotic stimulus; F:carbohydrate binding	-	48	9	2.67531	6.12877	22.5841	2.01142e-06	2.68812e-05
qs_c21952	2-aminoethanethiol dioxygenase-like	486	3.89209e-37	0.853	P:response to stress; F:nucleotide binding; F:catalytic activity; P:metabolic process	EC:1.13.11.19	7	2	2.67368	7.26895	42.7976	6.07061e-11	2.26946e-09
qs_c20676	gibberellin 3-beta-dioxygenase 1-like	693	2.39152e-87	0.6995	F:catalytic activity	EC:1.14.11.0	8	1	2.66297	5.60152	15.9208	6.60491e-05	0.000582495
qs_c21497	ap2-like ethylene-responsive transcription factor at1g16060-like	670	3.60623e-67	0.9365	P:growth; P:response to stress; P:response to abiotic stimulus; ; P:post-embryonic development; F:DNA binding; P:response to endogenous stimulus; F:sequence-specific DNA binding transcription factor activity; C:nucleus	-	8	1	2.66297	5.60152	15.9208	6.60491e-05	0.000582495
qs_c22149	dna-binding protein escarola-like	747	3.97754e-61	0.766	P:biological_process; F:DNA binding		8	1	2.66297	5.60152	15.9208	6.60491e-05	0.000582495
qs_c3716	wd repeat-containing protein 26-like	1033	2.92434e-130	0.8635	F:nucleotide binding	-	20	3	2.66297	5.60152	15.9208	6.60491e-05	0.000582495
qs_c79322	pentatricopeptide repeat-containing protein	453	9.09292e-32	0.83	C:mitochondrion; P:transport; P:cellular process; C:plastid; P:biosynthetic process; P:nucleobase-containing compound metabolic process; F:DNA binding	-	3	0	2.66297	5.60152	15.9208	6.60491e-05	0.000582495
qs_c79420	pentatricopeptide repeat-containing protein mitochondrial-like	475	2.97698e-67	0.8335	F:nuclease activity; C:plastid; P:nucleobase-containing compound metabolic process	-	3	0	2.66297	5.60152	15.9208	6.60491e-05	0.000582495
qs_c79442	atp-dependent zinc metalloprotease -like	486	2.56871e-09	0.8775	C:plastid; F:hydrolase activity; F:nucleotide binding; P:protein metabolic process; P:catabolic process; P:cellular component organization; P:cellular process	EC:3.4.24.0; EC:3.6.4.3	3	0	2.66297	5.60152	15.9208	6.60491e-05	0.000582495
qs_c80103	probable purple acid phosphatase 20-like	492	1.27677e-45	0.834	C:cytoplasm; F:binding; F:hydrolase activity	EC:3.1.3.2	3	0	2.66297	5.60152	15.9208	6.60491e-05	0.000582495
qs_c80115	two-component response regulator-like aprr2-like	476	2.42606e-07	0.7133	P:signal transduction	-	3	0	2.66297	5.60152	15.9208	6.60491e-05	0.000582495
qs_c80605	pentatricopeptide repeat-containing protein at4g13650-like	476	3.06889e-79	0.856	P:biological_process; C:cellular_component		3	0	2.66297	5.60152	15.9208	6.60491e-05	0.000582495
qs_c80733	nbs-containing resistance-like protein	478	1.20009e-25	0.724	F:hydrolase activity	-	3	0	2.66297	5.60152	15.9208	6.60491e-05	0.000582495
qs_c80797	28 kda chloroplastic	469	3.11091e-19	0.7675	F:nucleic acid binding; F:nucleotide binding	-	3	0	2.66297	5.60152	15.9208	6.60491e-05	0.000582495
qs_c80953	nbs-containing resistance-like protein	459	6.95346e-29	0.6975	F:hydrolase activity	-	3	0	2.66297	5.60152	15.9208	6.60491e-05	0.000582495
qs_c81117	photosystem i p700 apoprotein partial	472	7.60145e-103	0.9895	F:catalytic activity; F:molecular_function; F:binding; P:cellular protein modification process; C:membrane; C:thylakoid; P:photosynthesis; C:plastid; P:generation of precursor metabolites and energy	-	3	0	2.66297	5.60152	15.9208	6.60491e-05	0.000582495
qs_c81206	protein	448	1.98955e-30	0.866	C:plasma membrane; P:catabolic process; P:cellular process	-	3	0	2.66297	5.60152	15.9208	6.60491e-05	0.000582495
qs_c81936	sporulation-specific protein 15-like	453	0.00248523	0.6433	-		3	0	2.66297	5.60152	15.9208	6.60491e-05	0.000582495
qs_c83058	f-box protein at-b-like	494	1.09233e-15	0.7582	P:nucleobase-containing compound metabolic process; P:catabolic process	-	3	0	2.66297	5.60152	15.9208	6.60491e-05	0.000582495
qs_c83988	PREDICTED: uncharacterized protein LOC101313281	496	2.14162e-11	0.545	-		3	0	2.66297	5.60152	15.9208	6.60491e-05	0.000582495
qs_c84103	phosphoglycerate bisphosphoglycerate mutase family protein	484	7.51482e-80	0.899	P:metabolic process; F:catalytic activity; C:plastid	EC:5.4.2.1	3	0	2.66297	5.60152	15.9208	6.60491e-05	0.000582495
qs_c84388	uncharacterized loc101222648	464	2.70663e-52	0.7165	F:molecular_function; P:biological_process; C:cellular_component		3	0	2.66297	5.60152	15.9208	6.60491e-05	0.000582495
qs_c85445	small rna 2 -o-methyltransferase-like	446	1.98355e-34	0.7465	P:nucleobase-containing compound metabolic process; F:transferase activity; P:regulation of gene expression, epigenetic; P:response to stress; P:response to biotic stimulus; P:flower development; P:anatomical structure morphogenesis; C:cytoplasm; C:nucleus	-	3	0	2.66297	5.60152	15.9208	6.60491e-05	0.000582495
qs_c85585	notum-like protein	469	1.50658e-15	0.512	C:cytoplasmic membrane-bounded vesicle		3	0	2.66297	5.60152	15.9208	6.60491e-05	0.000582495
qs_c86144	recq-mediated genome instability protein 1-like	488	4.50708e-46	0.6815	P:cell cycle; P:response to stress; P:DNA metabolic process	-	3	0	2.66297	5.60152	15.9208	6.60491e-05	0.000582495
qs_c86284	cyclic nucleotide-gated ion channel 4-like	490	2.6345e-74	0.819	P:response to stress; P:cell death; F:nucleotide binding; P:transport; P:cellular homeostasis; P:cellular process; C:membrane; F:transporter activity; F:protein binding	-	3	0	2.66297	5.60152	15.9208	6.60491e-05	0.000582495
qs_c88437	uncharacterized loc101211699	492	1.1463e-40	0.7265	-		3	0	2.66297	5.60152	15.9208	6.60491e-05	0.000582495
qs_c91809	c2h2 zinc finger protein	472	6.30577e-43	0.789	F:binding; C:intracellular	-	3	0	2.66297	5.60152	15.9208	6.60491e-05	0.000582495
qs_rep_c42530	ctc-interacting domain 13 protein	640	1.29224e-60	0.699	F:RNA binding; F:nucleotide binding	-	5	0	2.66297	5.60152	15.9208	6.60491e-05	0.000582495
qs_rep_c44074	auxin-induced protein 5ng4-like	453	1.2755e-42	0.8345	P:cellular component organization; P:cellular process; C:membrane; P:pollination; P:anatomical structure morphogenesis; P:cell differentiation; P:cell growth; P:multicellular organismal development; P:transport	-	20	3	2.66297	5.60152	15.9208	6.60491e-05	0.000582495
qs_rep_c47678	probable indole-3-acetic acid-amido synthetase -like	663	1.21782e-101	0.934	F:catalytic activity; C:cytoplasm; P:transport; P:cellular process; P:response to endogenous stimulus; C:plastid; P:response to abiotic stimulus	-	5	0	2.66297	5.60152	15.9208	6.60491e-05	0.000582495
qs_rep_c47749	probable protein phosphatase 2c 76-like	480	9.73173e-71	0.929	C:cell; F:binding; P:anatomical structure morphogenesis; P:cell differentiation; P:multicellular organismal development; P:cell growth; F:hydrolase activity; P:cellular protein modification process	-	5	0	2.66297	5.60152	15.9208	6.60491e-05	0.000582495
qs_rep_c47924	serine hydroxymethyltransferase 2	598	1.42979e-53	0.805	C:cytosol; P:biological_process; F:binding; ; C:membrane; C:mitochondrion; P:metabolic process; P:cellular process; F:transferase activity	EC:2.1.2.1; EC:2.1.1.0	5	0	2.66297	5.60152	15.9208	6.60491e-05	0.000582495
qs_rep_c47958	vesicle-associated protein 2-1-like	584	2.98191e-48	0.7465	P:response to stress; P:cell death; C:intracellular; P:biosynthetic process; ; P:secondary metabolic process; P:transport; P:cellular process; F:structural molecule activity; C:plasma membrane	-	5	0	2.66297	5.60152	15.9208	6.60491e-05	0.000582495
qs_rep_c52051	s-adenosylmethionine partial	634	2.72025e-35	0.8695	P:response to stress; P:response to abiotic stimulus; F:transferase activity; F:binding; P:nucleobase-containing compound metabolic process; P:biosynthetic process; ; P:metabolic process; P:cellular process; F:nucleotide binding; C:cytoplasm	EC:2.5.1.6	5	0	2.66297	5.60152	15.9208	6.60491e-05	0.000582495
qs_c858	uncharacterized loc101218329	909	8.26412e-35	0.7735	-		30	5	2.65612	6.92345	35.4515	2.61475e-09	7.31381e-08
qs_c2046	er lumen protein retaining receptor-like	950	2.77562e-140	0.941	P:biosynthetic process; P:cellular process; P:lipid metabolic process; F:binding; C:membrane; P:carbohydrate metabolic process; P:metabolic process; F:receptor activity; C:cytoplasm; P:signal transduction; P:response to stress; P:transport; C:endoplasmic reticulum; C:Golgi apparatus	-	26	4	2.64807	5.87161	18.9038	1.37478e-05	0.000150418
qs_c10576	dna-directed rna polymerases and iii subunit rpabc1-like	814	7.84556e-112	0.911	F:transferase activity; C:nucleoplasm; P:transport; P:cellular component organization; P:cellular process; P:protein metabolic process; F:DNA binding;	EC:2.7.7.6	18	3	2.63796	6.09902	21.7371	3.12687e-06	4.04342e-05
qs_c12118	disease resistance protein at1g50180-like	792	5.70348e-71	0.681	P:defense response; F:ADP binding		18	3	2.63796	6.09902	21.7371	3.12687e-06	4.04342e-05
qs_c15582	serine threonine-protein kinase at3g07070-like	679	5.62173e-86	0.8765	F:receptor activity; F:kinase activity; P:cellular protein modification process; F:nucleotide binding	EC:2.7.10.2; EC:2.7.11.0	12	2	2.63796	6.09902	21.7371	3.12687e-06	4.04342e-05
qs_rep_c38536	two-component response regulator arr	553	1.22013e-37	0.6225	F:DNA binding		7	1	2.63796	6.09902	21.7371	3.12687e-06	4.04342e-05
qs_rep_c51242	della protein	703	6.7089e-158	0.9605	P:response to endogenous stimulus; P:signal transduction; ; P:post-embryonic development; P:response to stress; P:response to abiotic stimulus; P:transport; P:protein metabolic process; P:catabolic process; P:metabolic process	-	13	2	2.63063	6.29542	24.4321	7.69747e-07	1.21176e-05
qs_rep_c61025	vitamin b6 biosynthesis protein	410	1.46412e-40	0.8805	P:protein metabolic process; P:cellular process; P:response to abiotic stimulus; P:response to stress; P:biosynthetic process; C:plastid; C:cytosol; F:protein binding; F:catalytic activity	-	5	0	2.62509	6.46825	26.9993	2.03527e-07	3.75412e-06
qs_rep_c61479	predicted protein	307	6.15621e-25	0.85	F:molecular_function; P:biological_process		5	0	2.62509	6.46825	26.9993	2.03527e-07	3.75412e-06
qs_rep_c61575	myosin xi	379	2.17988e-31	0.8025	F:enzyme regulator activity; F:protein binding; P:anatomical structure morphogenesis; P:cell differentiation; P:multicellular organismal development; P:cell growth; C:peroxisome; P:cellular process; C:cytoskeleton; F:nucleotide binding; F:motor activity	-	5	0	2.62509	6.46825	26.9993	2.03527e-07	3.75412e-06
qs_rep_c61989	glutamate decarboxylase	140	5.1332e-14	0.9025	; F:binding; P:biological_process; F:catalytic activity; C:nucleus; C:cytosol; F:protein binding	EC:4.1.1.15	5	0	2.62509	6.46825	26.9993	2.03527e-07	3.75412e-06
qs_rep_c62473	beta-galactosidase 8-like	351	7.84769e-23	0.884	P:carbohydrate metabolic process; C:membrane; C:cytoplasm; C:cell wall; F:carbohydrate binding; F:hydrolase activity; F:binding	EC:3.2.1.23	5	0	2.62509	6.46825	26.9993	2.03527e-07	3.75412e-06
qs_rep_c62512	chitin-inducible gibberellin-responsive protein 1-like	316	7.19268e-12	0.5615	P:regulation of transcription, DNA-dependent; P:transcription, DNA-dependent		5	0	2.62509	6.46825	26.9993	2.03527e-07	3.75412e-06
qs_rep_c63925	translin-like protein	338	6.77498e-15	0.94	P:nucleobase-containing compound metabolic process; P:biosynthetic process; F:DNA binding; C:plastid; C:cytosol	-	5	0	2.62509	6.46825	26.9993	2.03527e-07	3.75412e-06
qs_c16104	protein	743	3.60901e-29	0.613	F:molecular_function; P:biological_process; C:cellular_component; P:oxidation-reduction process; F:oxidoreductase activity; C:integral to membrane; C:membrane; F:NADH dehydrogenase (ubiquinone) activity		8	1	2.60666	5.55845	15.0051	0.000107224	0.000877171
qs_c2211	probable polyamine transporter at3g13620-like	1416	0	0.8625	F:transporter activity; P:transport; P:cellular process; P:biosynthetic process; P:lipid metabolic process; C:membrane	-	32	7	2.60666	5.55845	15.0051	0.000107224	0.000877171
qs_c31312	protein	562	5.95917e-62	0.7855	P:metabolic process; F:transferase activity; C:plastid	EC:2.3.1.0	5	1	2.60666	5.55845	15.0051	0.000107224	0.000877171
qs_c5040	heat stress transcription factor b-3-like	1070	5.60542e-125	0.835	F:sequence-specific DNA binding transcription factor activity; F:DNA binding; P:biological_process; P:response to stress; C:nucleus;	-	18	3	2.60666	5.55845	15.0051	0.000107224	0.000877171
qs_c6650	wall-associated receptor kinase 2-like	877	6.47094e-83	0.638	P:cellular process; F:binding; F:kinase activity; P:metabolic process	-	11	1	2.60666	5.55845	15.0051	0.000107224	0.000877171
qs_c73658	srsf protein kinase 1-like	476	3.68176e-50	0.9015	P:response to stress; P:cellular protein modification process; F:kinase activity; F:nucleotide binding	EC:2.7.12.1; EC:2.7.11.0	3	0	2.60666	5.55845	15.0051	0.000107224	0.000877171
qs_c73876	at3g29240 mxo21_9	471	6.62997e-39	0.623	C:plastid	-	3	0	2.60666	5.55845	15.0051	0.000107224	0.000877171
qs_c74113	cca trna mitochondrial-like	490	1.52581e-29	0.825	F:transferase activity; F:RNA binding; P:response to abiotic stimulus; P:tropism; P:nucleobase-containing compound metabolic process; C:mitochondrion	EC:2.7.7.25	3	0	2.60666	5.55845	15.0051	0.000107224	0.000877171
qs_c74245	pentatricopeptide repeat-containing protein	489	3.91876e-75	0.6735	F:molecular_function; P:biological_process; C:cellular_component		3	0	2.60666	5.55845	15.0051	0.000107224	0.000877171
qs_c74679	snare-interacting protein keule-like	494	4.69774e-29	0.9025	C:cytosol; C:vacuole; C:cell; P:transport; P:cellular process; C:plasma membrane	-	3	0	2.60666	5.55845	15.0051	0.000107224	0.000877171
qs_c74872	formin-like protein 11-like	496	8.67151e-17	0.737	F:protein binding; P:cellular component organization; P:cellular process	-	3	0	2.60666	5.55845	15.0051	0.000107224	0.000877171
qs_c75084	dna cross-link repair protein snm1	488	4.55774e-38	0.872	P:response to stress; P:DNA metabolic process; F:hydrolase activity	-	3	0	2.60666	5.55845	15.0051	0.000107224	0.000877171
qs_c75164	random slug protein 5-like	483	2.10047e-38	0.8325	C:intracellular; P:transport; F:transporter activity	-	3	0	2.60666	5.55845	15.0051	0.000107224	0.000877171
qs_c75535	dead-box atp-dependent rna helicase chloroplastic-like	458	4.21643e-62	0.8565	P:transport; C:cytoplasm; P:nucleobase-containing compound metabolic process; F:nucleic acid binding; F:hydrolase activity; F:nucleotide binding; P:regulation of gene expression, epigenetic; P:cellular process; C:plastid; P:reproduction; P:post-embryonic development; P:embryo development	-	3	0	2.60666	5.55845	15.0051	0.000107224	0.000877171
qs_c76628	probable pectinesterase pectinesterase inhibitor 41-like	494	6.5484e-72	0.8015	F:hydrolase activity; P:cellular component organization; P:cellular process; P:biological_process; C:cell wall; F:enzyme regulator activity	EC:3.1.1.11	3	0	2.60666	5.55845	15.0051	0.000107224	0.000877171
qs_c76768	protein kinase and pp2c-like domain-containing	481	2.40335e-62	0.923	F:nucleotide binding; P:signal transduction; P:cellular protein modification process; F:kinase activity; F:signal transducer activity; F:hydrolase activity	EC:2.7.11.25; EC:3.1.3.16	3	0	2.60666	5.55845	15.0051	0.000107224	0.000877171
qs_c76916	receptor-like protein	470	1.90963e-34	0.6745	F:catalytic activity	-	3	0	2.60666	5.55845	15.0051	0.000107224	0.000877171
qs_c76964	casp-like protein poptrdraft_822486-like	321	2.48049e-24	0.8175	C:plasma membrane; C:membrane	-	3	0	2.60666	5.55845	15.0051	0.000107224	0.000877171
qs_c77066	phosphoglucosamine mutase family protein	471	1.12842e-51	0.9275	P:carbohydrate metabolic process; F:catalytic activity; P:nucleobase-containing compound metabolic process; P:biosynthetic process; C:plastid; C:cytosol	EC:5.4.2.3; EC:5.4.2.8	3	0	2.60666	5.55845	15.0051	0.000107224	0.000877171
qs_c77303	dna replication complex gins protein sld5-like	474	4.54367e-23	0.8105	C:nucleus; P:DNA metabolic process; P:biosynthetic process; P:cell cycle	-	3	0	2.60666	5.55845	15.0051	0.000107224	0.000877171
qs_c77586	uncharacterized loc101222590	475	7.47518e-09	0.657	P:metabolic process; P:cellular process	-	3	0	2.60666	5.55845	15.0051	0.000107224	0.000877171
qs_c77841	mitochondrial chaperone bcs1-like isoform 1	486	2.07062e-62	0.764	F:nucleotide binding	-	3	0	2.60666	5.55845	15.0051	0.000107224	0.000877171
qs_c77906	uncharacterized loc101209015	454	1.53232e-39	0.674	-		3	0	2.60666	5.55845	15.0051	0.000107224	0.000877171
qs_c78035	erebp-4 like protein	491	5.4411e-26	0.558	P:autophagy; F:molecular_function; P:biological_process		3	0	2.60666	5.55845	15.0051	0.000107224	0.000877171
qs_c78132	protein tic chloroplastic-like	494	9.08257e-62	0.808	P:nucleobase-containing compound metabolic process; P:generation of precursor metabolites and energy; P:photosynthesis; P:anatomical structure morphogenesis; P:post-embryonic development; C:membrane; C:plastid; C:thylakoid; F:nucleotide binding; P:transport	-	3	0	2.60666	5.55845	15.0051	0.000107224	0.000877171
qs_c78208	light-sensor protein kinase-like	446	1.1367e-78	0.866	F:kinase activity; F:receptor activity; P:cellular protein modification process; F:nucleotide binding	EC:2.7.10.1; EC:2.7.12.1	3	0	2.60666	5.55845	15.0051	0.000107224	0.000877171
qs_c78611	n-acetyl-d-glucosamine kinase	467	3.59182e-50	0.935	F:kinase activity; F:hydrolase activity; P:metabolic process; P:cellular process	EC:3.6.1.3	3	0	2.60666	5.55845	15.0051	0.000107224	0.000877171
qs_c78976	mate efflux family protein chloroplastic-like	478	3.57598e-77	0.8345	P:transport; P:cellular process; C:membrane; F:transporter activity	-	3	0	2.60666	5.55845	15.0051	0.000107224	0.000877171
qs_c79028	nbs-containing resistance-like protein	475	8.51176e-44	0.7595	P:response to stress; F:nucleotide binding	-	3	0	2.60666	5.55845	15.0051	0.000107224	0.000877171
qs_c79081	probable peptide transporter at1g52190-like	469	4.84604e-51	0.802	C:membrane; P:transport; C:plasma membrane; F:transporter activity	-	3	0	2.60666	5.55845	15.0051	0.000107224	0.000877171
qs_c79131	tpa: duf593 domain containing family protein	469	2.7202e-11	0.7289	C:cytoplasm	-	3	0	2.60666	5.55845	15.0051	0.000107224	0.000877171
qs_c79189	f-box lrr-repeat protein 3-like	457	3.62489e-58	0.7945	P:catabolic process; P:cellular process; P:secondary metabolic process; F:catalytic activity	EC:6.3.2.19	3	0	2.60666	5.55845	15.0051	0.000107224	0.000877171
qs_c79262	polyprotein	448	7.00144e-36	0.732	P:metabolic process; P:cellular process; C:plastid; F:nucleotide binding	-	3	0	2.60666	5.55845	15.0051	0.000107224	0.000877171
qs_c8287	clathrin light chain 2-like	984	2.11812e-22	0.8775	P:transport; P:cellular process; C:cytoplasm; C:plasma membrane; C:membrane; C:Golgi apparatus; C:plastid; F:structural molecule activity	-	18	3	2.60666	5.55845	15.0051	0.000107224	0.000877171
qs_c8412	protein	1275	0	0.8665	P:response to stress; P:response to abiotic stimulus; F:transferase activity; P:biosynthetic process; P:carbohydrate metabolic process; P:response to endogenous stimulus; P:cellular process	EC:2.4.1.12; EC:2.4.1.123	31	5	2.60666	5.55845	15.0051	0.000107224	0.000877171
qs_c86384	g-type lectin s-receptor-like serine threonine-protein kinase at2g19130-like	443	6.72148e-11	0.5945	P:cellular process; F:transferase activity	-	3	0	2.60666	5.55845	15.0051	0.000107224	0.000877171
qs_c87579	abscisic acid-insensitive 5-like protein 2-like	432	8.30621e-23	0.9445	F:DNA binding; F:protein binding; F:sequence-specific DNA binding transcription factor activity; P:signal transduction; P:response to endogenous stimulus; ; P:response to stress; C:nucleus	-	3	0	2.60666	5.55845	15.0051	0.000107224	0.000877171
qs_c95710	pentatricopeptide repeat-containing protein at2g21090-like	240	1.33335e-24	0.785	F:molecular_function; P:biological_process; C:cellular_component		3	0	2.60666	5.55845	15.0051	0.000107224	0.000877171
qs_c96503	histone-lysine n-methyltransferase ashh1-like	425	1.96981e-20	0.887	P:cellular component organization; P:cellular protein modification process; P:response to stress; P:DNA metabolic process; F:transferase activity; P:reproduction; P:post-embryonic development; C:nucleus	EC:2.1.1.43	3	0	2.60666	5.55845	15.0051	0.000107224	0.000877171
qs_c9165	leucine-rich repeat receptor-like protein kinase pxl2-like	588	3.74458e-78	0.9175	F:kinase activity; F:signal transducer activity; P:cellular protein modification process; P:metabolic process; P:anatomical structure morphogenesis; P:post-embryonic development; C:membrane; F:receptor activity; P:signal transduction; F:nucleotide binding; P:flower development; P:response to biotic stimulus; F:catalytic activity; P:reproduction; P:embryo development	EC:2.7.11.24; EC:1.3.1.74	7	1	2.59961	6.06865	20.891	4.86184e-06	5.98984e-05
qs_rep_c46147	protein	355	1.0645e-14	0.6117	C:membrane		4	0	2.59961	6.06865	20.891	4.86184e-06	5.98984e-05
qs_rep_c46889	pyruvate decarboxylase	185	8.05794e-15	0.9655	P:response to stress; P:metabolic process; F:binding; F:catalytic activity	EC:4.1.1.1	4	0	2.59961	6.06865	20.891	4.86184e-06	5.98984e-05
qs_rep_c47832	protein srg1-like	369	1.08494e-29	0.818	F:binding; P:biological_process; P:secondary metabolic process; F:catalytic activity; P:metabolic process; P:cellular process; F:transferase activity; P:biosynthetic process;	EC:1.14.11.23; EC:1.13.11.0; EC:2.1.1.0	4	0	2.59961	6.06865	20.891	4.86184e-06	5.98984e-05
qs_rep_c47894	pyruvate decarboxylase isozyme 2-like	324	4.77156e-25	0.991	C:membrane; P:metabolic process; P:response to stress; F:binding; F:catalytic activity	EC:4.1.1.1	4	0	2.59961	6.06865	20.891	4.86184e-06	5.98984e-05
qs_rep_c49858	60s ribosomal protein	399	2.67923e-28	0.8155	F:structural molecule activity; C:plasma membrane; C:cell wall; C:ribosome; C:cytosol; C:plastid; P:translation	-	4	0	2.59961	6.06865	20.891	4.86184e-06	5.98984e-05
qs_rep_c49966	at5g60390-like protein	296	4.33597e-19	0.9955	F:translation factor activity, nucleic acid binding; F:transferase activity; C:mitochondrion; C:nucleolus; P:translation; P:nucleobase-containing compound metabolic process; P:catabolic process; F:hydrolase activity; C:plastid; C:vacuole; P:biological_process; F:nucleotide binding; C:plasma membrane	EC:2.7.7.4	4	0	2.59961	6.06865	20.891	4.86184e-06	5.98984e-05
qs_rep_c50241	elongation factor 1-alpha	229	7.74912e-40	0.9715	C:nucleolus; C:vacuole; F:translation factor activity, nucleic acid binding; F:nucleotide binding; P:biological_process; C:plasma membrane; C:plastid; C:mitochondrion; P:translation	-	4	0	2.59961	6.06865	20.891	4.86184e-06	5.98984e-05
qs_rep_c53643	dna topoisomerase 1-like	663	7.22214e-38	0.859	C:plastid	-	11	1	2.59961	6.06865	20.891	4.86184e-06	5.98984e-05
qs_c14060	kinesin-like calmodulin binding protein	746	6.29037e-152	0.9555	F:motor activity; F:protein binding; P:metabolic process; C:cytoskeleton; F:catalytic activity; F:nucleotide binding; P:cellular process; P:anatomical structure morphogenesis; P:cellular component organization; P:cell differentiation; P:multicellular organismal development; P:pollination; C:plasma membrane	-	16	3	2.59602	6.4448	26.2115	3.05995e-07	5.53964e-06
qs_rep_c35810	vacuolar atp synthase subunit g	680	5.40499e-46	0.873	C:plasma membrane; P:transport; C:membrane; C:vacuole; F:hydrolase activity; F:transporter activity	EC:3.6.3.0	25	4	2.57347	7.08391	36.8695	1.26306e-09	3.69138e-08
qs_rep_c36745	peroxisome biogenesis protein 7-like	665	1.00348e-121	0.9185	F:binding; C:peroxisome; P:transport; P:cellular component organization; P:cellular process; C:intracellular; F:receptor activity; P:catabolic process; P:lipid metabolic process; F:protein binding; P:cellular protein modification process; F:transferase activity	EC:2.3.1.48	25	4	2.57347	7.08391	36.8695	1.26306e-09	3.69138e-08
qs_rep_c39765	yth domain family protein	528	4.13417e-57	0.763	P:biosynthetic process; ; P:nucleobase-containing compound metabolic process	-	6	1	2.5684	6.58015	27.9243	1.26159e-07	2.40649e-06
qs_rep_c45589	26s protease regulatory subunit 8	514	2.4345e-36	0.999	C:cytoplasm; F:hydrolase activity; C:intracellular; C:plasma membrane; P:protein metabolic process; P:catabolic process; F:nucleotide binding	EC:3.6.4.3	6	1	2.5684	6.58015	27.9243	1.26159e-07	2.40649e-06
qs_c22955	glycerol-3-phosphate dehydrogenase mitochondrial-like	665	4.81239e-75	0.907	F:catalytic activity; P:carbohydrate metabolic process; P:cellular process; C:cytoplasm; C:mitochondrion; P:metabolic process	EC:1.1.3.21; EC:1.1.5.3	9	2	2.56635	6.42095	25.4238	4.60212e-07	7.65792e-06
qs_c8059	nicotiana tabacum orf	1371	0	0.821	P:multicellular organismal development; P:protein metabolic process; P:cellular process; P:response to abiotic stimulus; P:signal transduction; P:response to stress; P:response to biotic stimulus; C:endoplasmic reticulum	-	63	12	2.56635	6.42095	25.4238	4.60212e-07	7.65792e-06
qs_rep_c57137	peptidyl-prolyl cis-trans isomerase cyp19-4-like	407	1.28888e-24	0.9525	P:protein metabolic process; P:cellular process; C:cell; C:endosome; C:Golgi apparatus; C:plasma membrane; P:multicellular organismal development; C:plastid; P:cellular protein modification process; C:cytosol; C:endoplasmic reticulum; F:catalytic activity	EC:5.2.1.8	5	0	2.56635	6.42095	25.4238	4.60212e-07	7.65792e-06
qs_rep_c60470	probable mitochondrial saccharopine dehydrogenase-like oxidoreductase at5g39410-like	433	1.91433e-66	0.8795	C:plastid; C:vacuole; F:catalytic activity; C:plasma membrane; C:mitochondrion; P:metabolic process; F:nucleotide binding	-	5	0	2.56635	6.42095	25.4238	4.60212e-07	7.65792e-06
qs_c10282	aspartokinase chloroplastic-like	506	1.55208e-68	0.8975	P:biosynthetic process; ; F:kinase activity; P:metabolic process; P:cellular process; F:binding; C:plastid	EC:2.7.2.4	5	1	2.56022	6.03762	20.046	7.56015e-06	8.84597e-05
qs_c13742	conserved hypothetical protein	756	4.39517e-11	0.5707	-		12	2	2.56022	6.03762	20.046	7.56015e-06	8.84597e-05
qs_c23031	PREDICTED: uncharacterized protein LOC100264359 isoform 2	772	2.74577e-90	0.8093	P:response to stress; P:response to abiotic stimulus	-	11	2	2.56022	6.03762	20.046	7.56015e-06	8.84597e-05
qs_rep_c38645	rna-binding protein rbp37	389	2.52289e-51	0.9345	F:nucleic acid binding; C:mitochondrion; F:nucleotide binding	-	4	0	2.56022	6.03762	20.046	7.56015e-06	8.84597e-05
qs_rep_c39384	map kinase kinase	312	4.22865e-30	0.828	F:kinase activity; P:response to stress; P:response to abiotic stimulus; P:response to biotic stimulus; P:response to external stimulus; F:nucleotide binding; P:signal transduction; P:cellular protein modification process; C:cytoplasm; C:plasma membrane	EC:2.7.11.0	4	0	2.56022	6.03762	20.046	7.56015e-06	8.84597e-05
qs_rep_c39855	polygalacturonase-1 non-catalytic subunit beta	200	1.08164e-16	0.76	P:cell growth; P:anatomical structure morphogenesis; P:cell differentiation; P:multicellular organismal development; P:carbohydrate metabolic process; P:cellular process; P:biosynthetic process; P:cellular component organization; P:growth; P:transport; P:biological_process; P:response to external stimulus; P:response to abiotic stimulus; F:hydrolase activity; P:flower development; C:extracellular…	EC:3.2.1.15	4	0	2.56022	6.03762	20.046	7.56015e-06	8.84597e-05
qs_rep_c40500	probable pre-mrna-splicing factor atp-dependent rna helicase-like	399	2.76371e-29	0.993	P:cell cycle; C:cytosol; F:RNA binding; F:hydrolase activity; C:mitochondrion; C:plasma membrane; P:cellular component organization; P:cellular process; F:nucleotide binding; P:biosynthetic process; P:cellular protein modification process; P:carbohydrate metabolic process	-	4	0	2.56022	6.03762	20.046	7.56015e-06	8.84597e-05
qs_rep_c41398	60s ribosomal protein l12	414	3.3863e-25	0.8245	C:ribosome; F:structural molecule activity; P:translation; F:RNA binding	-	4	0	2.56022	6.03762	20.046	7.56015e-06	8.84597e-05
qs_rep_c41511	collinsiai-like partial	441	5.10716e-45	0.9385	P:cellular component organization; P:cellular process; P:response to extracellular stimulus; P:cell communication; P:response to stress; P:biosynthetic process; P:carbohydrate metabolic process; C:membrane; P:cellular protein modification process; P:protein metabolic process; P:catabolic process; C:cytoplasm; P:regulation of gene expression, epigenetic; ; ; C:cytosol; F:binding; C:plastid; F:cata…	EC:6.3.5.5; EC:6.3.4.16	4	0	2.56022	6.03762	20.046	7.56015e-06	8.84597e-05
qs_rep_c41719	kinesin-like protein	381	3.00173e-14	0.796	P:cellular process; F:nucleotide binding; F:motor activity; C:cytoskeleton	-	4	0	2.56022	6.03762	20.046	7.56015e-06	8.84597e-05
qs_rep_c41860	lustrin a-like	340	1.20938e-09	0.9265	P:biosynthetic process; P:carbohydrate metabolic process; P:cellular process; P:cellular component organization	-	4	0	2.56022	6.03762	20.046	7.56015e-06	8.84597e-05
qs_rep_c42279	rna-binding protein nob1-like	440	1.79379e-12	0.7445	C:intracellular; P:transport; P:cellular process	-	4	0	2.56022	6.03762	20.046	7.56015e-06	8.84597e-05
qs_rep_c42361	26s proteasome non-atpase regulatory subunit 1-like	432	9.27567e-12	0.8825	P:protein metabolic process; P:catabolic process; P:cellular process; C:cytosol; P:cellular component organization; C:intracellular; P:response to stress; P:response to biotic stimulus; F:enzyme regulator activity; P:biosynthetic process; P:carbohydrate metabolic process; P:response to abiotic stimulus; P:tropism; P:biological_process; C:plasma membrane	-	4	0	2.56022	6.03762	20.046	7.56015e-06	8.84597e-05
qs_rep_c43422	PREDICTED: uncharacterized protein LOC100245533 isoform 1	1694	0	0.873	F:molecular_function; P:biological_process; C:cellular_component		70	12	2.56022	6.03762	20.046	7.56015e-06	8.84597e-05
qs_rep_c45621	cytochrome p450	354	5.96697e-60	0.9635	F:binding; C:membrane; F:molecular_function; F:catalytic activity; P:metabolic process	EC:1.14.13.21	4	0	2.56022	6.03762	20.046	7.56015e-06	8.84597e-05
qs_c31876	late embryogenesis abundant hydroxyproline-rich glycoprotein	503	1.76309e-76	0.8155	P:response to stress; P:response to abiotic stimulus	-	6	1	2.55534	5.79946	17.1475	3.45856e-05	0.000336929
qs_c56582	profilin family protein	620	8.23961e-71	0.895	P:catabolic process; P:cellular process; P:lipid metabolic process; C:cell wall; F:hydrolase activity; F:protein binding; C:plasma membrane; P:cellular component organization; C:membrane; C:cytoskeleton	EC:3.1.1.1	6	1	2.55534	5.79946	17.1475	3.45856e-05	0.000336929
qs_c9526	uncharacterized loc101205981 isoform 1	437	3.98858e-20	0.759	F:molecular_function; P:biological_process		6	1	2.52124	6.68398	28.8345	7.8835e-08	1.61064e-06
qs_rep_c123388	benzyl alcohol o-benzoyltransferase-like	423	6.03177e-52	0.788	F:transferase activity	-	4	0	2.51972	6.00591	19.2025	1.17557e-05	0.000129857
qs_rep_c38282	gibberellin receptor	426	7.15497e-39	0.939	P:response to stress; P:response to external stimulus; F:protein binding; P:response to endogenous stimulus; P:signal transduction; P:response to biotic stimulus; P:response to abiotic stimulus; P:anatomical structure morphogenesis; P:flower development; P:cell death; P:transport; P:cellular process; F:hydrolase activity; C:intracellular; P:post-embryonic development; P:biosynthetic process; P:ca…	-	4	0	2.51972	6.00591	19.2025	1.17557e-05	0.000129857
qs_rep_c63728	f-box lrr-repeat protein at3g48880-like	510	3.10411e-50	0.7705	F:molecular_function; P:biological_process		4	0	2.51972	6.00591	19.2025	1.17557e-05	0.000129857
qs_rep_c64810	serine threonine-protein kinase	528	2.45068e-104	0.9185	P:cellular protein modification process; F:kinase activity; P:regulation of gene expression, epigenetic; P:nucleobase-containing compound metabolic process; P:response to stress; P:response to biotic stimulus; P:post-embryonic development; F:nucleotide binding; F:protein binding; C:plasma membrane	EC:2.7.11.23; EC:2.7.10.0	4	0	2.51972	6.00591	19.2025	1.17557e-05	0.000129857
qs_rep_c65019	heat stress transcription factor a-8	491	2.98011e-29	0.719	F:DNA binding	-	4	0	2.51972	6.00591	19.2025	1.17557e-05	0.000129857
qs_rep_c66121	PREDICTED: laccase-14-like	524	4.23661e-31	0.8055	F:binding; F:catalytic activity; C:extracellular region; P:catabolic process; ; P:secondary metabolic process; P:metabolic process	EC:1.10.3.2; EC:1.10.3.3	4	0	2.51972	6.00591	19.2025	1.17557e-05	0.000129857
qs_rep_c67611	patatin t5	543	8.37259e-46	0.907	C:cytoplasm; P:biosynthetic process; P:cellular process; P:lipid metabolic process; P:response to stress; P:cell death; P:response to biotic stimulus; P:biological_process; F:hydrolase activity; C:membrane	-	4	0	2.51972	6.00591	19.2025	1.17557e-05	0.000129857
qs_rep_c68130	cationic peroxidase 1-like	503	4.46692e-55	0.8245	P:response to stress; P:catabolic process; P:cellular process; F:binding; F:catalytic activity; C:extracellular region; P:metabolic process	EC:1.11.1.7	4	0	2.51972	6.00591	19.2025	1.17557e-05	0.000129857
qs_rep_c69648	ring-h2 finger protein atl46-like	500	6.24836e-09	0.616	F:metal ion binding; F:zinc ion binding		4	0	2.51972	6.00591	19.2025	1.17557e-05	0.000129857
qs_rep_c76421	---NA---	126			-		4	0	2.51972	6.00591	19.2025	1.17557e-05	0.000129857
qs_rep_c83225	g-type lectin s-receptor-like serine threonine-protein kinase at1g34300-like	521	5.11398e-63	0.8815	F:kinase activity; F:receptor activity; P:pollen-pistil interaction; P:cellular protein modification process; F:nucleotide binding	EC:2.7.10.1; EC:2.7.11.0	4	0	2.51972	6.00591	19.2025	1.17557e-05	0.000129857
qs_rep_c37781	translocase of chloroplast chloroplastic-like	502	4.3869e-25	0.9545	P:biological_process; F:receptor activity; P:transport; P:cellular process; F:hydrolase activity; P:anatomical structure morphogenesis; P:multicellular organismal development; P:flower development; C:membrane; C:plastid; F:nucleotide binding	-	6	1	2.51408	6.53643	26.4	2.77535e-07	5.03372e-06
qs_rep_c69237	protein pat1-1-like protein	454	4.48553e-60	0.791	-		4	0	2.50511	6.37204	23.8493	1.04182e-06	1.51786e-05
qs_rep_c69322	gibberellin 20 oxidase 1-like	458	1.90479e-06	0.8868	F:catalytic activity; F:binding; P:biosynthetic process; ; P:secondary metabolic process; P:metabolic process	EC:1.14.11.23; EC:1.13.11.0	4	0	2.50511	6.37204	23.8493	1.04182e-06	1.51786e-05
qs_rep_c69399	u-box domain-containing protein	471	3.00244e-39	0.875	C:plasma membrane; P:cell growth; P:biosynthetic process; P:carbohydrate metabolic process; P:cellular process; C:membrane; C:cytosol; C:thylakoid; P:photosynthesis	-	4	0	2.50511	6.37204	23.8493	1.04182e-06	1.51786e-05
qs_rep_c70342	nodulation receptor kinase	468	6.92044e-41	0.7315	P:biosynthetic process; P:cellular process; P:cellular protein modification process; F:kinase activity; P:transport; P:metabolic process; P:response to stress; F:receptor activity; F:nucleotide binding; P:biological_process; P:catabolic process; ; P:response to biotic stimulus	EC:2.7.11.0	4	0	2.50511	6.37204	23.8493	1.04182e-06	1.51786e-05
qs_rep_c72072	glycolate oxidase	484	5.40484e-61	0.984	C:ribosome; C:vacuole; C:peroxisome; P:biosynthetic process; P:cellular process; F:nucleotide binding; C:plastid; C:membrane; C:nucleus; C:extracellular region; P:metabolic process	EC:1.1.3.15	4	0	2.50511	6.37204	23.8493	1.04182e-06	1.51786e-05
qs_rep_c72648	protein	495	4.57448e-89	0.965	P:biosynthetic process; P:cellular process; P:carbohydrate metabolic process; C:membrane; C:mitochondrion; F:catalytic activity; F:transferase activity	EC:4.2.1.1	4	0	2.50511	6.37204	23.8493	1.04182e-06	1.51786e-05
qs_rep_c77322	c-1-tetrahydrofolate cytoplasmic-like	479	4.51619e-59	0.93	C:cytosol; P:metabolic process; P:biosynthetic process; P:carbohydrate metabolic process; P:cellular process; F:catalytic activity; F:hydrolase activity; F:nucleotide binding; P:transport; C:plastid;	EC:1.5.1.5; EC:3.5.4.9	4	0	2.50511	6.37204	23.8493	1.04182e-06	1.51786e-05
qs_rep_c84702	40s ribosomal protein s24-2-like	480	1.25188e-80	0.9635	C:ribosome; F:structural molecule activity; C:membrane; C:vacuole; P:translation; F:nucleotide binding	-	4	0	2.50511	6.37204	23.8493	1.04182e-06	1.51786e-05
qs_rep_c92291	telomere repeat-binding protein 5-like	481	2.45112e-53	0.742	F:hydrolase activity; C:intracellular; F:DNA binding; F:nucleotide binding	-	4	0	2.50511	6.37204	23.8493	1.04182e-06	1.51786e-05
qs_rep_c36309	probable aldo-keto reductase 1-like	913	1.32425e-108	0.895	P:metabolic process; F:catalytic activity	EC:1.1.1.65	18	3	2.49354	6.18648	21.1729	4.19648e-06	5.22276e-05
qs_rep_c44382	elongation factor 1-gamma	735	3.72917e-115	0.851	C:vacuole; F:translation factor activity, nucleic acid binding; C:cytoplasm; F:binding; P:biological_process; C:plasma membrane; C:cell wall; F:transferase activity; P:translation	-	12	2	2.49354	6.18648	21.1729	4.19648e-06	5.22276e-05
qs_c897	pleiotropic drug resistance protein 2-like	4599	0	0.9015	P:transport; F:hydrolase activity; F:transporter activity; C:membrane; P:nucleobase-containing compound metabolic process; P:catabolic process; F:nucleotide binding	EC:3.6.3.28	248	54	2.48137	6.78084	29.7271	4.97349e-08	1.04673e-06
qs_rep_c37028	beta- soluble isoenzyme i-like	530	2.67863e-81	0.825	C:vacuole; C:cell wall; P:carbohydrate metabolic process; F:transferase activity; F:hydrolase activity	EC:2.4.1.99; EC:3.2.1.26; EC:3.2.1.48; EC:3.2.1.80	11	3	2.47805	7.60152	44.8735	2.10185e-11	8.40398e-10
qs_c19709	oxysterol-binding protein 1d-like	799	2.9891e-129	0.933	F:lipid binding	-	16	3	2.47805	5.97349	18.3609	1.82768e-05	0.000192122
qs_rep_c37299	l-type lectin-domain containing receptor kinase -like	938	4.40139e-135	0.803	P:response to stress; F:carbohydrate binding; P:response to extracellular stimulus; P:cell communication; P:response to endogenous stimulus; P:signal transduction; F:kinase activity; P:biosynthetic process; P:cellular process; P:cellular protein modification process; P:response to biotic stimulus; P:cell death; P:metabolic process; ; P:transport; C:intracellular; F:receptor activity; C:plasma mem…	EC:2.7.10.2; EC:2.7.11.0	15	2	2.47805	5.97349	18.3609	1.82768e-05	0.000192122
qs_rep_c44775	zinc finger protein 5-like	424	1.1114e-44	0.703	P:multicellular organismal development; F:binding; P:biological_process	-	10	1	2.47805	5.97349	18.3609	1.82768e-05	0.000192122
qs_rep_c46102	mevalonate diphosphate decarboxylase	502	1.3042e-48	0.933	P:biosynthetic process; P:cellular process; P:lipid metabolic process; C:cytosol; F:catalytic activity; F:nucleotide binding; F:protein binding; P:secondary metabolic process	EC:4.1.1.33	4	0	2.47805	5.97349	18.3609	1.82768e-05	0.000192122
qs_rep_c46112	pyruvate dehydrogenase e1 component subunit beta	447	6.93359e-73	0.9935	F:catalytic activity; C:nucleolus; P:nucleobase-containing compound metabolic process; P:carbohydrate metabolic process; P:catabolic process; P:secondary metabolic process; P:response to stress; P:response to biotic stimulus; P:biosynthetic process; P:cellular process; P:generation of precursor metabolites and energy; C:mitochondrion; F:nucleotide binding; C:plasma membrane	EC:1.2.4.1; EC:1.1.1.44	4	0	2.47805	5.97349	18.3609	1.82768e-05	0.000192122
qs_rep_c46570	u4 tri-snrnp-associated protein	530	9.72865e-45	0.7155	P:regulation of gene expression, epigenetic; P:cellular component organization; ; P:cellular process; P:response to stress; P:response to abiotic stimulus; P:reproduction; P:post-embryonic development; P:embryo development; P:multicellular organismal development; C:nucleolus; P:biological_process; P:signal transduction; P:cellular protein modification process; P:anatomical structure morphogenesis…	-	4	0	2.47805	5.97349	18.3609	1.82768e-05	0.000192122
qs_rep_c48064	40s ribosomal protein s3-3-like	772	7.93142e-131	0.9815	C:nucleolus; F:structural molecule activity; C:plasma membrane; F:RNA binding; C:membrane; C:vacuole; C:ribosome; C:cytosol; C:plastid; P:translation; P:response to stress; P:response to abiotic stimulus	-	10	1	2.47805	5.97349	18.3609	1.82768e-05	0.000192122
qs_rep_c49569	serine threonine-protein phosphatase pp2a catalytic subunit-like	507	2.40361e-48	0.98	C:cytoplasm; F:hydrolase activity; C:plasma membrane; C:nucleus	EC:3.1.3.16	4	0	2.47805	5.97349	18.3609	1.82768e-05	0.000192122
qs_rep_c51513	phospholipase d alpha	697	6.56639e-05	0.745	P:lipid metabolic process; F:binding; F:hydrolase activity; P:biological_process; P:cellular process; C:plastid; C:membrane	EC:3.1.4.0	10	1	2.47805	5.97349	18.3609	1.82768e-05	0.000192122
qs_rep_c52366	PREDICTED: uncharacterized protein LOC100809318	526	2.47535e-23	0.947	C:membrane	-	4	0	2.47805	5.97349	18.3609	1.82768e-05	0.000192122
qs_rep_c52516	probable galacturonosyltransferase-like 9-like	630	1.6775e-85	0.7865	P:biosynthetic process; P:carbohydrate metabolic process; F:transferase activity; C:Golgi apparatus; P:cellular process; P:lipid metabolic process	EC:2.4.1.43	6	1	2.47805	5.97349	18.3609	1.82768e-05	0.000192122
qs_rep_c52565	heat shock cognate 70 kda	557	5.28141e-48	0.798	F:catalytic activity; F:nucleotide binding; P:response to stress; P:metabolic process	EC:1.3.1.74	4	0	2.47805	5.97349	18.3609	1.82768e-05	0.000192122
qs_rep_c56823	nadp-dependent alkenal double bond reductase p2-like	546	3.61133e-87	0.8815	P:response to stress; P:biological_process; C:plasma membrane; F:catalytic activity; C:nucleus; F:binding; C:cytosol; F:nucleotide binding; P:metabolic process	EC:1.3.1.74	4	0	2.47805	5.97349	18.3609	1.82768e-05	0.000192122
qs_rep_c58027	eukaryotic translation initiation factor 5b-like	532	3.20254e-50	0.9515	F:translation factor activity, nucleic acid binding; P:translation; C:cytosol; P:nucleobase-containing compound metabolic process; P:catabolic process; F:hydrolase activity; F:nucleotide binding; C:plasma membrane	-	4	0	2.47805	5.97349	18.3609	1.82768e-05	0.000192122
qs_c23962	uncharacterized exonuclease domain-containing protein at3g15140-like	319	9.83856e-21	0.7585	P:biosynthetic process; P:nucleobase-containing compound metabolic process; F:nuclease activity; F:nucleic acid binding; C:mitochondrion	-	6	1	2.47072	6.64334	27.3571	1.69144e-07	3.18912e-06
qs_c29856	brefeldin a-inhibited guanine nucleotide-exchange protein 1-like	469	5.25014e-58	0.8855	P:cell cycle; P:signal transduction; F:enzyme regulator activity; P:cellular component organization; P:cellular process; P:transport; C:plastid; P:biological_process; P:response to abiotic stimulus; P:tropism	-	5	1	2.45763	6.49134	24.8766	6.1121e-07	9.69999e-06
qs_c30528	uncharacterized loc101220441	477	6.68795e-50	0.745	-		5	1	2.45763	6.49134	24.8766	6.1121e-07	9.69999e-06
qs_c28497	lipopolysaccharide-binding protein	514	1.86216e-63	0.797	C:membrane; C:vacuole; C:plasma membrane; F:lipid binding	-	5	1	2.45713	6.15791	20.3607	6.41348e-06	7.6368e-05
qs_c30577	protein fra10ac1-like	537	2.31496e-12	0.9005	F:molecular_function; P:biological_process		5	1	2.45713	6.15791	20.3607	6.41348e-06	7.6368e-05
qs_rep_c63150	nucleolar protein 56-like	465	4.07729e-60	0.747	C:intracellular	-	4	0	2.44116	6.32141	22.2772	2.3599e-06	3.09877e-05
qs_rep_c63424	v-type proton atpase subunit b2	477	5.89361e-37	1	C:membrane; C:vacuole; F:hydrolase activity; F:transporter activity; P:nucleobase-containing compound metabolic process; P:carbohydrate metabolic process; P:catabolic process; P:secondary metabolic process; P:biosynthetic process; P:cellular process; C:plastid; P:cellular component organization; P:response to stress; P:response to abiotic stimulus; P:protein metabolic process; P:transport; C:Golg…	-	4	0	2.44116	6.32141	22.2772	2.3599e-06	3.09877e-05
qs_rep_c63632	ribonuclease 3-like	466	2.09492e-40	0.7615	F:structural molecule activity; P:nucleobase-containing compound metabolic process; P:catabolic process; F:nuclease activity; F:RNA binding; P:response to stress; P:response to abiotic stimulus; P:regulation of gene expression, epigenetic; P:cellular component organization; P:cellular process; F:DNA binding; C:intracellular; P:transport; F:sequence-specific DNA binding transcription factor activi…	EC:3.1.26.3	4	0	2.44116	6.32141	22.2772	2.3599e-06	3.09877e-05
qs_rep_c65617	thioredoxin-like 1- chloroplastic-like	469	2.4597e-55	0.737	F:catalytic activity; C:membrane; C:plastid	EC:1.8.4.0	4	0	2.44116	6.32141	22.2772	2.3599e-06	3.09877e-05
qs_rep_c66541	r2r3-myb transcription	464	2.18626e-42	0.9245	P:response to endogenous stimulus; P:response to stress; P:response to abiotic stimulus; P:response to biotic stimulus; F:DNA binding	-	4	0	2.44116	6.32141	22.2772	2.3599e-06	3.09877e-05
qs_rep_c66706	3 -5 exonuclease and kh-i domain-containing protein	486	1.5236e-40	0.9165	P:transport; P:cellular process; C:intracellular; F:RNA binding; P:nucleobase-containing compound metabolic process; F:nuclease activity	-	4	0	2.44116	6.32141	22.2772	2.3599e-06	3.09877e-05
qs_rep_c66957	monodehydroascorbate reductase	493	1.54718e-44	0.6085	P:biological_process	-	4	0	2.44116	6.32141	22.2772	2.3599e-06	3.09877e-05
qs_rep_c67233	phospholipid-transporting atpase 9-like	466	7.2537e-91	0.9665	F:protein binding; C:membrane; C:plastid; F:hydrolase activity; F:transporter activity; F:nucleotide binding; P:transport; F:binding; P:metabolic process; C:plasma membrane	EC:3.6.3.1	4	0	2.44116	6.32141	22.2772	2.3599e-06	3.09877e-05
qs_rep_c68832	microtubule-associated protein 70-5-like	457	2.74044e-61	0.757	P:carbohydrate metabolic process; P:cellular process; F:protein binding; C:cytoskeleton; P:cellular component organization; P:multicellular organismal development; P:biosynthetic process	-	4	0	2.44116	6.32141	22.2772	2.3599e-06	3.09877e-05
qs_rep_c39888	nucleobase-ascorbate transporter 6-like	509	1.76638e-77	0.954	C:vacuole; C:plasma membrane; C:cell wall; P:transport; P:cellular process; F:transporter activity	-	4	0	2.43514	5.94032	17.5216	2.84069e-05	0.000280653
qs_rep_c40041	hexokinase- chloroplastic-like	600	5.62311e-41	0.871	F:kinase activity; P:metabolic process; P:cellular process; P:carbohydrate metabolic process; F:nucleotide binding; C:plastid; P:generation of precursor metabolites and energy; P:catabolic process	EC:2.7.1.2; EC:2.7.1.4	6	1	2.43514	5.94032	17.5216	2.84069e-05	0.000280653
qs_rep_c40384	two-component response regulator-like aprr7-like	610	1.85478e-45	0.868	F:transcription regulator activity; F:signal transducer activity; P:signal transduction; C:mitochondrion; P:biological_process; P:response to abiotic stimulus; F:DNA binding; P:reproduction; P:post-embryonic development; P:metabolic process; P:cellular process; F:kinase activity; ; C:nucleus	-	6	1	2.43514	5.94032	17.5216	2.84069e-05	0.000280653
qs_rep_c40498	probable ubiquitin-conjugating enzyme e2 24-like	541	4.70159e-63	0.854	P:biological_process; P:cellular protein modification process; P:response to extracellular stimulus; P:cell communication; P:response to stress; F:catalytic activity; P:transport	EC:6.3.2.19	4	0	2.43514	5.94032	17.5216	2.84069e-05	0.000280653
qs_rep_c41228	uncharacterized partial	531	7.05162e-36	0.935	C:plastid	-	4	0	2.43514	5.94032	17.5216	2.84069e-05	0.000280653
qs_rep_c42140	cytochrome p450 78a3-like	548	2.22613e-55	0.813	P:flower development; P:anatomical structure morphogenesis; P:multicellular organismal development; P:metabolic process; F:catalytic activity; P:growth; F:molecular_function; F:binding; P:cellular process; C:endoplasmic reticulum	EC:1.14.13.88	4	0	2.43514	5.94032	17.5216	2.84069e-05	0.000280653
qs_rep_c42525	low quality protein: uncharacterized loc101205453	615	5.71409e-20	0.813	F:molecular_function; P:biological_process; C:cellular_component		6	1	2.43514	5.94032	17.5216	2.84069e-05	0.000280653
qs_rep_c42674	bromodomain-containing protein	512	1.28779e-29	0.6571	F:transferase activity	-	4	0	2.43514	5.94032	17.5216	2.84069e-05	0.000280653
qs_rep_c45777	respiratory burst oxidase homolog protein e-like	545	1.42738e-83	0.889	F:catalytic activity; C:membrane; C:mitochondrion; F:binding; P:metabolic process	EC:1.6.3.1; EC:1.11.1.7	4	0	2.43514	5.94032	17.5216	2.84069e-05	0.000280653
qs_rep_c51488	orcinol o-methyltransferase	565	1.94223e-67	0.844	F:transferase activity; F:protein binding; P:metabolic process; P:cellular process	EC:2.1.1.6	11	2	2.43416	6.74288	28.2927	1.04288e-07	2.05964e-06
qs_c22389	mitochondral 37s ribosomal protein s27-like	530	8.87313e-36	0.8895	P:cellular protein modification process; P:biosynthetic process; ; P:nucleobase-containing compound metabolic process	-	8	2	2.42523	6.85391	29.9031	4.54176e-08	9.58969e-07
qs_c23439	tmv resistance protein n-like	519	1.90601e-26	0.6015	P:defense response; F:ADP binding; P:signal transduction; C:intracellular; F:ATP binding; F:nucleotide binding; F:nucleoside-triphosphatase activity		5	1	2.41978	6.12877	19.5499	9.80044e-06	0.000109873
qs_c23697	predicted protein	514	6.68816e-05	0.7067	-		5	1	2.41978	6.12877	19.5499	9.80044e-06	0.000109873
qs_c23813	transcription factor ice1	528	4.58e-93	0.9405	P:cell cycle; P:cell differentiation; P:post-embryonic development; P:response to stress; P:response to abiotic stimulus; P:reproduction; P:embryo development; P:cellular protein modification process; P:biological_process; P:cellular component organization; P:signal transduction; P:anatomical structure morphogenesis; P:multicellular organismal development; F:DNA binding; F:sequence-specific DNA b…	-	5	1	2.41978	6.12877	19.5499	9.80044e-06	0.000109873
qs_c24080	protein	511	6.80176e-24	0.645	F:molecular_function; P:response to heat; C:cellular_component		5	1	2.41978	6.12877	19.5499	9.80044e-06	0.000109873
qs_rep_c50819	eukaryotic initiation factor 4a-10-like	437	5.53213e-21	0.86	F:translation factor activity, nucleic acid binding; P:translation; C:cytosol; P:biological_process; F:hydrolase activity; C:cell wall; C:membrane; C:vacuole; F:nucleotide binding; C:Golgi apparatus	-	4	0	2.41978	6.12877	19.5499	9.80044e-06	0.000109873
qs_rep_c50882	plasma membrane intrinsic protein	369	3.23721e-52	0.945	P:transport; P:cellular process; C:membrane; F:transporter activity	-	4	0	2.41978	6.12877	19.5499	9.80044e-06	0.000109873
qs_rep_c51996	low quality protein: myrcene chloroplastic-like	299	2.19945e-27	0.7825	P:response to endogenous stimulus; F:catalytic activity; P:biosynthetic process; P:cellular process; P:lipid metabolic process; P:secondary metabolic process; P:response to external stimulus; P:response to stress; P:response to biotic stimulus; F:binding; C:cytosol; C:plastid	EC:4.2.3.20; EC:4.2.3.14; EC:4.2.3.15; EC:4.2.3.16	4	0	2.41978	6.12877	19.5499	9.80044e-06	0.000109873
qs_rep_c53083	---NA---	142			-		4	0	2.41978	6.12877	19.5499	9.80044e-06	0.000109873
qs_rep_c38583	hexaubiquitin protein	467	4.95257e-58	0.974	P:cellular protein modification process	-	5	1	2.41837	6.60152	25.8801	3.63292e-07	6.13393e-06
qs_c14736	aldose 1-epimerase family protein	787	5.28806e-135	0.798	F:carbohydrate binding; P:biosynthetic process; ; P:carbohydrate metabolic process; P:cellular process; F:catalytic activity; P:nucleobase-containing compound metabolic process	EC:5.1.3.3	14	3	2.40808	6.29542	21.4927	3.55187e-06	4.51463e-05
qs_c10057	1-aminocyclopropane-1-carboxylate oxidase homolog 11	1074	3.46035e-165	0.772	P:catabolic process; P:cellular process; P:secondary metabolic process; P:biological_process; P:response to external stimulus; P:response to stress; P:cell death; F:catalytic activity; P:biosynthetic process; ; P:metabolic process	EC:1.14.11.0	57	11	2.4029	6.83599	29.2058	6.50842e-08	1.35519e-06
qs_c22792	nudix hydrolase chloroplastic-like	593	3.38617e-60	0.8405	F:nucleotide binding; F:hydrolase activity; C:plastid	EC:3.6.1.17	12	3	2.4029	6.83599	29.2058	6.50842e-08	1.35519e-06
qs_c22859	calmodulin-binding transcription activator 3-like	719	8.12141e-66	0.634	C:nucleus; F:DNA binding	-	15	3	2.39889	6.4448	23.3551	1.34689e-06	1.88798e-05
qs_c23351	sts14 protein	456	3.60795e-59	0.817	F:molecular_function; P:biological_process		5	1	2.39889	6.4448	23.3551	1.34689e-06	1.88798e-05
qs_c1837	rwp-rk transcription factor	710	3.99476e-78	0.61	F:molecular_function; P:biological_process		24	5	2.39171	7.03762	32.2858	1.3308e-08	3.13492e-07
qs_rep_c49151	diacylglycerol kinase a-like	546	3.72039e-75	0.794	P:metabolic process; P:signal transduction; C:plasma membrane; P:cellular process; P:multicellular organismal development; F:kinase activity	EC:2.7.1.107	8	2	2.39171	7.03762	32.2858	1.3308e-08	3.13492e-07
qs_c17527	e3 ubiquitin-protein ligase topors-like	720	5.12225e-72	0.6679	F:binding	-	10	2	2.39091	5.90638	16.6848	4.41324e-05	0.000420915
qs_c2410	structural maintenance of chromosomes protein 4-like	1081	1.05509e-154	0.8245	P:regulation of gene expression, epigenetic; ; P:cellular component organization; P:DNA metabolic process; P:biosynthetic process; P:cell cycle; P:cellular protein modification process; P:cellular process; P:response to stress; P:response to biotic stimulus; P:anatomical structure morphogenesis; P:flower development; F:transporter activity; P:nucleobase-containing compound metabolic process; C:pl…	-	26	5	2.39091	5.90638	16.6848	4.41324e-05	0.000420915
qs_c6671	trna pseudouridine synthase pus10-like	757	3.72566e-81	0.8765	F:RNA binding; P:cellular component organization; P:cellular protein modification process; P:flower development; P:anatomical structure morphogenesis; P:nucleobase-containing compound metabolic process; F:catalytic activity	EC:5.4.99.12	10	2	2.39091	5.90638	16.6848	4.41324e-05	0.000420915
qs_c8135	---NA---	313			-		6	1	2.39091	5.90638	16.6848	4.41324e-05	0.000420915
qs_rep_c37145	auxin-responsive protein iaa13-like	577	5.50366e-39	0.825	P:multicellular organismal development; P:translation; P:embryo development; ; F:protein binding; P:response to endogenous stimulus; P:signal transduction; C:nucleus	-	6	1	2.39091	5.90638	16.6848	4.41324e-05	0.000420915
qs_rep_c38657	sucrose partial	498	1.09502e-65	0.9065	F:transferase activity; P:biosynthetic process; P:carbohydrate metabolic process; P:cellular process	EC:2.4.1.13	4	0	2.39091	5.90638	16.6848	4.41324e-05	0.000420915
qs_rep_c50800	blue copper	239	3.16062e-11	0.8393	F:binding; F:molecular_function	-	4	0	2.38143	6.09902	18.7411	1.49724e-05	0.000162003
qs_rep_c52856	uncharacerized protein	737	2.47886e-07	0.7557	C:mitochondrion	-	11	2	2.38143	6.09902	18.7411	1.49724e-05	0.000162003
qs_rep_c58694	pleiotropic drug resistance protein 1-like	476	6.79394e-25	0.7095	P:biological_process; F:hydrolase activity; F:transporter activity; P:nucleobase-containing compound metabolic process; P:catabolic process; P:transport; F:nucleotide binding; C:plasma membrane	-	4	0	2.37424	6.26895	20.7094	5.34538e-06	6.44743e-05
qs_rep_c59007	heparanase-like protein 3-like	458	2.13578e-05	0.922	-		4	0	2.37424	6.26895	20.7094	5.34538e-06	6.44743e-05
qs_rep_c60004	late blight resistance protein homolog r1b-12-like	466	4.11239e-17	0.739	P:defense response; F:ADP binding		4	0	2.37424	6.26895	20.7094	5.34538e-06	6.44743e-05
qs_rep_c60407	btb and taz domain protein 4	491	1.56418e-52	0.8955	P:multicellular organismal development; P:response to endogenous stimulus; F:protein binding; F:transcription regulator activity; F:binding; P:response to stress; P:response to abiotic stimulus; ; P:response to external stimulus; P:biological_process; C:membrane; C:vacuole; P:abscission; P:flower development; P:anatomical structure morphogenesis; F:transferase activity; P:cellular component organ…	EC:2.3.1.48	4	0	2.37424	6.26895	20.7094	5.34538e-06	6.44743e-05
qs_rep_c61686	serine threonine-protein phosphatase 4 regulatory subunit 3-like	466	1.15784e-38	0.6665	P:gravitropism; P:response to red or far red light; P:biological_process; C:cellular_component		4	0	2.37424	6.26895	20.7094	5.34538e-06	6.44743e-05
qs_c16598	c2 and gram domain-containing protein at1g03370-like	469	7.32212e-54	0.8165	P:response to stress; P:response to biotic stimulus; P:biosynthetic process; P:cellular process	-	5	1	2.3686	6.42095	22.5955	1.99954e-06	2.68812e-05
qs_c22216	beta-galactosidase 1-like	499	9.25789e-42	0.8765	P:carbohydrate metabolic process; C:cell wall; F:carbohydrate binding; C:intracellular; F:binding; F:hydrolase activity	EC:3.2.1.23	9	3	2.36598	7.20056	34.5182	4.22289e-09	1.12949e-07
qs_c1846	thylakoid membrane phosphoprotein 14 chloroplast	579	2.62927e-56	0.8355	C:plastid; C:membrane; C:thylakoid	-	19	6	2.35279	7.69397	43.2118	4.91237e-11	1.87225e-09
qs_c14170	aspartate glutamate uridylate kinase family protein	528	7.75315e-97	0.8865	P:biosynthetic process; ; F:kinase activity; P:metabolic process; P:cellular process	-	5	1	2.34204	6.06865	17.9344	2.28653e-05	0.000236917
qs_c16466	protein set-like	557	5.52737e-91	0.837	P:cellular component organization; P:cellular process; C:nucleus	-	5	1	2.34204	6.06865	17.9344	2.28653e-05	0.000236917
qs_rep_c35058	s-adenosylmethionine decarboxylase proenzyme	1399	2.60332e-159	0.738	P:biosynthetic process; ; F:catalytic activity; C:plastid	EC:4.1.1.50	44	11	2.34204	6.06865	17.9344	2.28653e-05	0.000236917
qs_rep_c51406	nbs-lrr resistance protein	929	9.17184e-26	0.6565	P:defense response; F:ADP binding; F:hydrolase activity; F:phosphoprotein phosphatase activity		16	3	2.34204	6.06865	17.9344	2.28653e-05	0.000236917
qs_rep_c51309	ubiquitin-conjugating enzyme e2-17 kda	355	2.85576e-23	0.9735	P:response to stress; P:response to biotic stimulus; P:catabolic process; P:cellular process; P:lipid metabolic process; P:protein metabolic process; P:cellular component organization; P:transport; P:anatomical structure morphogenesis; P:cell growth; P:biosynthetic process; P:DNA metabolic process; P:cell cycle; F:catalytic activity; C:intracellular; P:cellular protein modification process; C:pla…	EC:6.3.2.19	9	2	2.34136	7.62258	41.5381	1.15593e-10	4.03586e-09
qs_c12221	---NA---	105			-		19	4	2.33958	6.24198	19.9276	8.04299e-06	9.34938e-05
qs_c15588	skip interacting protein 15	643	2.27651e-48	0.906	F:molecular_function; P:biological_process; C:cellular_component		8	2	2.33958	6.24198	19.9276	8.04299e-06	9.34938e-05
qs_c9608	dna-directed rna polymerase iii subunit rpc3-like	522	1.58539e-14	0.7195	F:transferase activity; F:DNA binding;	EC:2.7.7.6	5	1	2.33958	6.24198	19.9276	8.04299e-06	9.34938e-05
qs_rep_c74447	nitrilase-associated protein	343	8.49441e-21	0.8935	C:mitochondrion	-	4	0	2.33958	6.24198	19.9276	8.04299e-06	9.34938e-05
qs_rep_c76716	beta-galactosidase	347	1.26778e-21	0.7725	P:carbohydrate metabolic process; F:hydrolase activity; F:binding	EC:3.2.1.23	4	0	2.33958	6.24198	19.9276	8.04299e-06	9.34938e-05
qs_rep_c35175	caffeic acid 3-o-methyltransferase-like	1037	1.06463e-175	0.8225	F:transferase activity; F:protein binding; P:metabolic process; P:cellular process	-	39	7	2.33765	6.3967	21.837	2.96826e-06	3.85106e-05
qs_c13334	bifunctional epoxide hydrolase 2-like	859	1.83557e-145	0.825	F:hydrolase activity; C:cytosol; P:metabolic process; F:kinase activity	EC:3.3.2.10; EC:2.7.10.2	24	5	2.33611	6.53643	23.6679	1.14476e-06	1.66289e-05
qs_rep_c53089	autophagy-related protein 8f-like	564	6.66669e-67	0.9295	C:membrane; P:response to extracellular stimulus; P:cell communication; P:response to stress; F:receptor activity; C:vacuole	-	10	2	2.33484	6.66381	25.4254	4.59822e-07	7.65792e-06
qs_rep_c54341	cinnamate 4- partial	638	5.43602e-115	0.9645	P:multicellular organismal development; C:cell wall; F:catalytic activity; P:response to external stimulus; P:response to stress; C:plasma membrane; F:molecular_function; F:binding; ; P:secondary metabolic process; P:growth; C:endoplasmic reticulum; P:response to abiotic stimulus; P:metabolic process	EC:1.14.13.11	10	2	2.33484	6.66381	25.4254	4.59822e-07	7.65792e-06
qs_rep_c48682	---NA---	98			-		15	4	2.31395	7.32141	35.4107	2.67022e-09	7.45831e-08
qs_rep_c51055	heat shock cognate protein 80-like	478	5.9232e-91	0.9945	P:protein metabolic process; P:cellular process; P:response to stress; F:nucleotide binding; F:protein binding	-	29	6	2.31168	6.97349	29.6395	5.20338e-08	1.09277e-06
qs_c3241	exosome complex component rrp41-like	874	1.76226e-135	0.9505	F:transferase activity; F:nuclease activity	EC:2.7.7.56	23	5	2.30761	6.51406	22.932	1.67838e-06	2.29801e-05
qs_rep_c68058	atp synthase d	293	1.81328e-22	0.97	F:binding; F:transporter activity; C:membrane; C:mitochondrion; C:nucleolus; P:response to stress; P:response to abiotic stimulus; P:transport; P:generation of precursor metabolites and energy; P:nucleobase-containing compound metabolic process; P:biosynthetic process; C:vacuole; C:thylakoid; C:plastid; F:hydrolase activity; C:ribosome; C:plasma membrane	-	4	0	2.30406	6.2145	19.1477	1.20984e-05	0.000132669
qs_rep_c68404	cinnamoyl reductase	438	5.61991e-20	0.951	P:biosynthetic process; ; P:secondary metabolic process; F:catalytic activity; F:binding; F:nucleotide binding; P:metabolic process; P:response to stress; P:response to abiotic stimulus	EC:1.2.1.44	4	0	2.30406	6.2145	19.1477	1.20984e-05	0.000132669
qs_rep_c68422	duf246 domain-containing protein at1g04910-like	321	7.51822e-29	0.968	P:biosynthetic process; P:cellular process; P:lipid metabolic process; C:Golgi apparatus; P:metabolic process	-	4	0	2.30406	6.2145	19.1477	1.20984e-05	0.000132669
qs_rep_c68560	mip sip subfamily	319	6.82804e-10	0.857	C:membrane; C:endoplasmic reticulum; F:transporter activity; P:transport	-	4	0	2.30406	6.2145	19.1477	1.20984e-05	0.000132669
qs_rep_c68812	cyclic nucleotide-gated ion channel 1-like	417	1.5038e-38	0.835	P:response to stress; P:biosynthetic process; P:cellular process; P:cell death; ; P:biological_process; P:transport; P:response to biotic stimulus; C:membrane; C:intracellular; F:nucleotide binding; F:transporter activity; P:signal transduction; C:plasma membrane; F:protein binding	-	4	0	2.30406	6.2145	19.1477	1.20984e-05	0.000132669
qs_rep_c69246	proline iminopeptidase	308	3.95512e-11	0.7245	C:cytosol; C:plastid; F:hydrolase activity	-	4	0	2.30406	6.2145	19.1477	1.20984e-05	0.000132669
qs_rep_c69389	protein	348	2.56012e-27	0.95	C:membrane; C:cell wall; F:protein binding; P:cellular component organization; P:cellular process; C:Golgi apparatus; C:plasma membrane	-	4	0	2.30406	6.2145	19.1477	1.20984e-05	0.000132669
qs_rep_c69547	ribonuclease p protein subunit p38-like protein	349	6.78389e-17	0.8155	P:biological_process		4	0	2.30406	6.2145	19.1477	1.20984e-05	0.000132669
qs_rep_c69591	6-phosphofructokinase 3-like	422	4.57402e-37	0.867	C:plasma membrane; P:metabolic process; P:cellular process; F:kinase activity; C:cytosol; F:nucleotide binding; P:generation of precursor metabolites and energy; P:carbohydrate metabolic process; P:catabolic process	EC:2.7.1.11; EC:2.7.1.90	4	0	2.30406	6.2145	19.1477	1.20984e-05	0.000132669
qs_rep_c69827	probable inactive purple acid phosphatase 2-like	297	7.44509e-08	0.895	F:binding; F:hydrolase activity; P:metabolic process; P:cellular process; C:plastid; P:carbohydrate metabolic process; C:mitochondrion	EC:3.1.3.2	4	0	2.30406	6.2145	19.1477	1.20984e-05	0.000132669
qs_rep_c70321	protein disulfide	314	9.77135e-13	0.891	P:pollination; P:multicellular organismal development; P:metabolic process; F:catalytic activity; P:response to stress; P:cellular process; P:cellular homeostasis; F:molecular_function; C:cell wall; C:endoplasmic reticulum; P:biological_process; P:reproduction; C:plasma membrane; P:post-embryonic development; P:embryo development	EC:5.3.4.1	4	0	2.30406	6.2145	19.1477	1.20984e-05	0.000132669
qs_rep_c73709	probable protein disulfide-isomerase a6-like	195	6.22612e-05	0.86	P:pollination; P:multicellular organismal development; P:metabolic process; F:catalytic activity; P:response to stress; P:cellular process; P:cellular homeostasis; F:molecular_function; C:cell wall; C:endoplasmic reticulum; P:biological_process; P:reproduction; C:plasma membrane; P:post-embryonic development; P:embryo development	EC:5.3.4.1	4	0	2.30406	6.2145	19.1477	1.20984e-05	0.000132669
qs_c14186	cation transport regulator-like protein 2-like	915	7.54589e-109	0.8775	C:cytosol	-	14	3	2.29818	5.83599	15.0213	0.000106305	0.000877171
qs_c4451	purple acid phosphatase 22-like	1063	0	0.8585	F:binding; P:biosynthetic process; P:cellular process; P:lipid metabolic process; C:cytoplasm; F:hydrolase activity; ; P:response to extracellular stimulus; P:cell communication; P:response to stress	EC:3.1.3.2	23	5	2.29818	5.83599	15.0213	0.000106305	0.000877171
qs_c9551	adipose-regulatory protein	997	7.02677e-27	0.5575	F:molecular_function; P:biological_process; C:cellular_component		22	4	2.29818	5.83599	15.0213	0.000106305	0.000877171
qs_rep_c47591	succinic semialdehyde reductase isofom1	446	1.59126e-62	0.9265	P:response to stress; F:catalytic activity; C:cytosol; P:nucleobase-containing compound metabolic process; P:carbohydrate metabolic process; P:catabolic process; P:secondary metabolic process; P:biosynthetic process; P:cellular process; P:lipid metabolic process; ; F:nucleotide binding; F:binding; P:cellular component organization	EC:1.1.1.31; EC:1.1.1.44; EC:1.1.1.30	9	1	2.29818	5.83599	15.0213	0.000106305	0.000877171
qs_rep_c49228	eukaryotic translation initiation factor 5a-2-like	542	1.25985e-15	0.997	F:translation factor activity, nucleic acid binding; P:translation; P:cellular protein modification process; ; P:cellular component organization; F:binding	-	5	1	2.2737	6.34695	20.3239	6.53779e-06	7.78008e-05
qs_rep_c58304	atp synthase subunit beta	433	1.75269e-55	0.981	F:transporter activity; P:nucleobase-containing compound metabolic process; P:biosynthetic process; F:nucleotide binding; F:hydrolase activity; P:transport; P:cellular process; C:membrane	-	4	0	2.26765	6.18648	18.3699	1.81912e-05	0.000192122
qs_rep_c65732	endo- -beta-d-glucanase-like	387	1.52774e-14	0.841	P:response to stress; P:response to abiotic stimulus; C:cytoplasm; F:hydrolase activity; C:extracellular region; C:nucleus; C:plasma membrane	-	4	0	2.26765	6.18648	18.3699	1.81912e-05	0.000192122
qs_rep_c65851	sec12-like protein 1-like	368	3.26038e-21	0.8715	C:plasma membrane; P:response to extracellular stimulus; P:cell communication; P:response to stress; P:transport; P:cellular process; C:endoplasmic reticulum	-	4	0	2.26765	6.18648	18.3699	1.81912e-05	0.000192122
qs_rep_c66671	alpha-glucan water chloroplast	312	1.72664e-44	0.8525	F:kinase activity; C:mitochondrion; F:binding; P:response to biotic stimulus; C:plastid; P:carbohydrate metabolic process; P:cellular process; P:catabolic process; P:biological_process; F:nucleotide binding; P:response to stress; P:response to abiotic stimulus; F:protein binding; P:biosynthetic process; P:metabolic process	EC:2.7.13.3; EC:2.7.9.4	4	0	2.26765	6.18648	18.3699	1.81912e-05	0.000192122
qs_rep_c67122	d-aminoacyl-trna deacylase	308	4.68717e-29	0.7405	P:response to abiotic stimulus; C:cytosol; F:hydrolase activity; P:response to stress; P:biological_process	-	4	0	2.26765	6.18648	18.3699	1.81912e-05	0.000192122
qs_c20234	hydrogen-transporting atp rotational	528	1.24526e-47	0.8865	F:transporter activity; C:membrane; C:mitochondrion; P:transport; P:generation of precursor metabolites and energy; P:nucleobase-containing compound metabolic process; P:biosynthetic process	-	7	2	2.26117	6.72351	25.025	5.65911e-07	9.06199e-06
qs_rep_c127173	protein	666	9.25369e-62	0.8675	-		9	2	2.24886	6.46825	21.4634	3.60653e-06	4.51463e-05
qs_rep_c54725	heat-shock protein	524	2.4556e-37	0.9765	P:protein metabolic process; P:cellular process; P:response to stress; C:cell wall; F:nucleotide binding; F:protein binding; C:mitochondrion	-	8	2	2.23907	7.09902	30.1073	4.08797e-08	8.67481e-07
qs_c18105	chaperone -domain containing protein	613	2.66336e-42	0.892	P:protein metabolic process; P:cellular process; P:transport; P:cellular component organization; P:response to stress; F:protein binding	-	11	3	2.23614	6.70388	24.3298	8.11724e-07	1.27068e-05
qs_c14712	protease do-like chloroplastic-like	679	1.77218e-114	0.987	P:nucleobase-containing compound metabolic process; P:carbohydrate metabolic process; P:catabolic process; P:secondary metabolic process; P:protein metabolic process; P:cellular process; C:membrane; C:thylakoid; C:plastid; P:generation of precursor metabolites and energy; P:photosynthesis; F:hydrolase activity; P:biosynthetic process; C:nucleus	EC:3.4.21.0	12	3	2.2303	6.15791	17.5945	2.7338e-05	0.000272155
qs_rep_c58111	ankyrin repeat domain-containing protein 2-like	419	6.63407e-44	0.874	P:protein metabolic process; P:cellular process; C:membrane; C:plastid; P:reproduction; P:post-embryonic development; P:transport; P:biological_process; P:response to stress; P:response to biotic stimulus; C:nucleus; C:plasma membrane	-	4	0	2.2303	6.15791	17.5945	2.7338e-05	0.000272155
qs_rep_c33674	ring finger and chy zinc finger domain-containing protein 1-like	1423	5.72395e-144	0.8355	F:binding	-	83	20	2.22694	6.90638	26.9939	2.041e-07	3.76114e-06
qs_rep_c55698	eukaryotic translation initiation factor 3 subunit e-like	614	1.30844e-126	0.9365	C:cytoplasm; P:response to stress; P:response to biotic stimulus; P:biosynthetic process; P:cellular process; P:translation; P:response to abiotic stimulus; F:protein binding; P:reproduction; P:post-embryonic development; P:embryo development; P:transport; P:cellular component organization; ; F:translation factor activity, nucleic acid binding; P:regulation of gene expression, epigenetic; P:nucle…	-	14	4	2.21455	7.24198	31.7973	1.71133e-08	3.92262e-07
qs_rep_c47842	s-adenosylmethionine-dependent methyltransferase	542	5.47512e-55	0.762	P:biological_process; P:metabolic process; P:cellular process; C:mitochondrion; F:transferase activity	EC:2.1.1.0	5	1	2.20678	6.29542	18.8179	1.43814e-05	0.000157087
qs_c19965	n6-adenosine-methyltransferase mt-a70-like	756	9.47472e-50	0.845	F:RNA binding; C:nucleoplasm; F:transferase activity; F:protein binding; C:plastid; P:nucleobase-containing compound metabolic process; P:reproduction; P:post-embryonic development; P:embryo development	EC:2.1.1.62	13	3	2.17212	6.26895	18.0681	2.13141e-05	0.000222853
qs_rep_c33506	leucoanthocyanidin dioxygenase	1279	0	0.869	P:biosynthetic process; P:cellular process; P:lipid metabolic process; P:response to external stimulus; P:response to stress; P:signal transduction; P:response to endogenous stimulus; F:binding; F:catalytic activity; P:metabolic process; P:response to biotic stimulus	EC:1.14.11.0; EC:1.13.11.0	104	28	2.16294	7.34695	32.2381	1.36387e-08	3.2051e-07
qs_c10163	hap1 n-terminal conserved region and shugoshin c terminus domain-containing protein	528	1.02518e-23	0.6942	P:cellular component organization; P:response to stress; P:DNA metabolic process; P:response to abiotic stimulus; C:intracellular; P:multicellular organismal development; P:nucleobase-containing compound metabolic process; P:cell cycle; P:biosynthetic process; P:anatomical structure morphogenesis; P:cellular process	-	6	2	2.15601	6.3967	19.2717	1.13372e-05	0.000126017
qs_c1399	protein	534	7.93656e-43	0.85	F:molecular_function; P:biological_process		18	7	2.15288	8.50841	51.5731	6.89811e-13	3.53995e-11
qs_c19007	r2r3-myb transcription	649	2.01015e-88	0.711	F:DNA binding		7	2	2.15256	6.09902	16.0525	6.16106e-05	0.000570635
qs_c32180	pentatricopeptide repeat-containing protein chloroplastic-like	651	9.77362e-46	0.714	F:zinc ion binding		7	2	2.15256	6.09902	16.0525	6.16106e-05	0.000570635
qs_rep_c34134	cucumber peeling	674	3.45873e-29	0.697	F:electron carrier activity; F:copper ion binding		59	16	2.11728	8.47984	49.6819	1.8081e-12	8.72891e-11
qs_c2053	actin related protein	597	4.57488e-48	0.836	C:nucleus; F:structural molecule activity; P:cellular process	-	17	6	2.11428	7.50274	33.4497	7.31329e-09	1.84879e-07
qs_c20236	peptidyl-prolyl cis-trans isomerase e-like	646	1.76101e-71	0.928	P:post-embryonic development; F:nucleic acid binding; P:catabolic process; P:lipid metabolic process; P:cellular protein modification process; F:transferase activity; P:cellular process; P:multicellular organismal development; P:response to endogenous stimulus; P:transport; P:biological_process; F:nucleotide binding; F:catalytic activity	EC:2.3.2.8	10	3	2.10399	6.60152	20.8689	4.91815e-06	6.04398e-05
qs_c3634	gata zinc finger domain-containing protein 25-like	735	1.31782e-21	0.6469	-		17	4	2.10399	6.60152	20.8689	4.91815e-06	6.04398e-05
qs_rep_c35961	pyruvate dehydrogenase e1 alpha subunit	745	2.85703e-07	0.5145	F:oxidoreductase activity, acting on the aldehyde or oxo group of donors, disulfide as acceptor; P:oxidation-reduction process; C:chloroplast envelope; C:intracellular membrane-bounded organelle; C:chloroplast; F:pyruvate dehydrogenase (acetyl-transferring) activity; P:metabolic process; P:glycolysis; C:plastid		18	4	2.09633	6.70388	21.9725	2.76585e-06	3.61967e-05
qs_rep_c43979	---NA---	727			-		18	4	2.09633	6.70388	21.9725	2.76585e-06	3.61967e-05
qs_rep_c35352	peptidase m	650	9.33292e-109	0.8755	-		23	8	2.09559	8.0763	42.1171	8.59663e-11	3.15942e-09
qs_c14610	binding protein	585	6.2988e-97	0.9025	C:mitochondrion	-	10	3	2.07604	6.58015	20.1809	7.04533e-06	8.36879e-05
qs_c17405	bzip transcription factor bzip82	316	1.06638e-27	0.737	F:molecular_function; C:cellular_component		5	1	2.05675	6.32141	17.0994	3.5473e-05	0.000342672
qs_c6742	auxin response factor 18-like	1340	3.18689e-125	0.854	P:flower development; P:biological_process; ; F:RNA binding; P:reproduction; P:cellular process; F:DNA binding; P:biosynthetic process; ; P:secondary metabolic process; P:growth; P:multicellular organismal development; F:protein binding; F:sequence-specific DNA binding transcription factor activity; P:signal transduction; P:response to endogenous stimulus; C:nucleus	-	53	15	2.05675	6.32141	17.0994	3.5473e-05	0.000342672
qs_rep_c53095	PREDICTED: uncharacterized protein LOC100250761	554	1.42484e-11	0.7183	-		8	2	2.05174	6.4448	18.3183	1.86907e-05	0.000196157
qs_c20069	probable ribosome biogenesis protein rlp24-like	250	1.14348e-14	0.738	C:ribosome		11	4	2.04091	6.76199	21.7292	3.13968e-06	4.05462e-05
qs_c3094	structural constituent of	767	2.49404e-47	0.9055	C:ribosome; F:structural molecule activity; P:translation; F:RNA binding	-	19	5	2.04091	6.76199	21.7292	3.13968e-06	4.05462e-05
qs_c69173	cyclin-dependent protein	483	3.20378e-84	0.8695	F:kinase activity; F:protein binding; P:metabolic process; P:cell cycle	-	4	1	2.02449	6.15791	15.0986	0.000102039	0.000859205
qs_c7804	type i inositol -trisphosphate 5-phosphatase 2-like	592	1.71552e-15	0.7795	P:carbohydrate metabolic process; P:cellular process; P:response to stress; P:response to endogenous stimulus; P:metabolic process; P:post-embryonic development; P:response to abiotic stimulus; P:response to external stimulus; P:lipid metabolic process; F:hydrolase activity; F:catalytic activity; P:signal transduction	EC:3.1.3.56; EC:1.3.1.74	7	2	2.02449	6.15791	15.0986	0.000102039	0.000859205
qs_rep_c33928	protein tify 9	1135	2.55116e-44	0.6495	P:response to stress; P:response to biotic stimulus; P:response to abiotic stimulus; P:response to external stimulus; P:biological_process; P:response to endogenous stimulus; F:protein binding; C:nucleus	-	88	26	2.01238	7.08391	25.1788	5.22524e-07	8.54322e-06
qs_c15203	#NAME?	518	6.32527e-28	0.76	P:protein metabolic process; P:cellular process; F:protein binding; P:response to stress	-	19	8	2.01005	8.72351	49.2994	2.19727e-12	1.05555e-10

## Sheet: Down regulated
List of transcripts differentially expressed in ECM roots versus non symbiotic roots (absolute log2 FC ≥ 2; FDR < 0.001)
Sequence ID	BLAST2Go annotation	Length	Min. E value	Mean simil.	GO terms	Enzymes code	# Reads ECM	# Reads non-sym	log2FC normalized	log2CPM	LR	PValue	adjusted P value
qs_c12365	---NA---	465			-		0	22	-7.59246	5.32141	30.6947	3.0199e-08	6.66423e-07
qs_c100357	protein-s-isoprenylcysteine o-methyltransferase	365	9.53496e-53	0.88	P:cellular protein modification process; F:transferase activity; C:membrane	EC:2.1.1.100	0	3	-7.40088	5.15791	27.1137	1.91834e-07	3.60996e-06
qs_c1755	uncharacterized loc101203503	1654	7.06579e-105	0.837	F:carbohydrate binding	-	0	41	-7.17991	4.97349	23.4654	1.27183e-06	1.8379e-05
qs_c9487	lrr receptor-like serine threonine-protein kinase fls2-like	1394	5.76206e-57	0.548	-		0	24	-7.17991	4.97349	23.4654	1.27183e-06	1.8379e-05
qs_c19557	magnesium transporter nipa2-like	1118	1.02825e-142	0.9115	C:membrane	-	0	14	-7.01123	4.83599	20.9944	4.60619e-06	5.72537e-05
qs_c10910	probable lrr receptor-like serine threonine-protein kinase at3g47570-like	851	6.30834e-84	0.7695	F:receptor activity; P:cellular protein modification process; F:nucleotide binding; C:membrane; F:kinase activity	EC:2.7.11.0	0	7	-6.82018	4.68398	18.4916	1.70657e-05	0.000183133
qs_c122682	subtilisin-like protease-like	942	5.52724e-100	0.868	P:biological_process; P:protein metabolic process; P:catabolic process; F:protein binding; F:hydrolase activity	EC:3.4.21.0	0	13	-6.82018	4.68398	18.4916	1.70657e-05	0.000183133
qs_c125669	dna excision repair protein ercc-1-like	1114	7.65348e-118	0.937	P:response to abiotic stimulus; P:response to stress; P:DNA metabolic process; F:DNA binding; F:nuclease activity; P:nucleobase-containing compound metabolic process; P:catabolic process; P:cellular component organization; C:nucleus	-	0	10	-6.59991	4.51406	15.9559	6.48346e-05	0.000582495
qs_c17611	udp-glycosyltransferase 89b1-like	1012	1.32281e-81	0.6005	F:transferase activity; P:metabolic process	-	0	10	-6.59991	4.51406	15.9559	6.48346e-05	0.000582495
qs_c22884	aminoacyl trna synthase complex-interacting multifunctional protein 1-like	1138	7.24755e-92	0.863	F:RNA binding; F:catalytic activity; C:mitochondrion; C:plastid	-	0	17	-6.59991	4.51406	15.9559	6.48346e-05	0.000582495
qs_c3920	aaa-type atpase family protein	1527	0	0.7795	F:hydrolase activity; F:nucleotide binding; P:protein metabolic process; P:catabolic process; C:mitochondrion	EC:3.6.4.3	1	27	-6.59991	4.51406	15.9559	6.48346e-05	0.000582495
qs_c1899	protein chup1	564	8.92968e-66	0.664	C:plastid		0	26	-6.06355	7.72351	119.884	6.70865e-28	2.30119e-25
qs_c17969	retinoblastoma-related protein	487	4.37093e-33	0.796	C:cytosol; P:anatomical structure morphogenesis; P:cellular component organization; P:cell differentiation; P:multicellular organismal development; ; P:cell growth; P:cellular process; P:regulation of gene expression, epigenetic; P:nucleobase-containing compound metabolic process; P:DNA metabolic process; P:biosynthetic process; P:cell cycle; P:reproduction; C:nucleus	-	0	19	-6.03309	8.633	179.784	5.40194e-41	9.6017e-38
qs_rep_c35111	r2r3-myb transcription	582	1.37183e-90	0.811	F:DNA binding	-	0	37	-5.89097	8.80408	189.741	3.62199e-43	8.85214e-40
qs_c21025	reverse transcriptase family partial	481	3.6801e-43	0.69	F:transferase activity; P:metabolic process; P:cellular process; F:binding; F:transporter activity	-	0	16	-5.82674	8.43292	162.269	3.61307e-37	3.9246e-34
qs_c3436	uncharacterized partial	546	1.45124e-30	0.904	F:molecular_function; P:biological_process		0	20	-5.82674	8.43292	162.269	3.61307e-37	3.9246e-34
qs_rep_c34816	chlorophyll a-b binding protein chloroplastic-like	341	3.67452e-22	0.9295	C:plastid; F:binding; P:generation of precursor metabolites and energy; P:photosynthesis; C:membrane; C:thylakoid; P:cellular protein modification process	-	0	79	-5.68887	9.2656	219.385	1.23186e-49	6.84449e-46
qs_c15421	protein	580	1.53543e-18	0.6585	P:response to stress; P:response to abiotic stimulus	-	0	19	-5.66909	7.34695	95.5129	1.4693e-22	2.72156e-20
qs_c21065	nucleolar protein 6-like	445	5.3185e-39	0.841	P:biosynthetic process; P:nucleobase-containing compound metabolic process; C:cytosol	-	0	15	-5.64298	8.25553	147.513	6.06227e-34	4.38999e-31
qs_c14464	plasma membrane sulphate transporter	566	1.76826e-05	0.655	C:membrane; F:transporter activity; P:transport; P:cellular process	-	0	19	-5.64216	7.32141	93.9845	3.18006e-22	5.75709e-20
qs_c14665	chromatin remodeling complex subunit	471	2.07066e-79	0.9645	F:hydrolase activity; P:cellular component organization; P:cellular process; F:DNA binding; C:plasma membrane; C:cytoplasm; F:chromatin binding; F:nucleotide binding; F:transferase activity; C:nucleus; F:binding	-	0	15	-5.60036	8.2145	144.206	3.20312e-33	2.08758e-30
qs_c19903	extensin-like protein	509	0.000765363	0.805	C:cell wall; P:biosynthetic process;	-	0	17	-5.60036	8.2145	144.206	3.20312e-33	2.08758e-30
qs_c19896	apo protein mitochondrial-like	512	5.98161e-78	0.7885	F:RNA binding; F:binding; C:mitochondrion	-	0	17	-5.55645	8.17227	140.844	1.74017e-32	1.03102e-29
qs_c4582	glutaredoxin family protein	400	1.65273e-42	0.886	P:cellular homeostasis; F:molecular_function; F:catalytic activity	-	0	25	-5.55645	8.17227	140.844	1.74017e-32	1.03102e-29
qs_c3321	ribosomal protein	402	6.11495e-07	0.6455	C:cytoplasm; C:intracellular	-	0	23	-5.52641	8.14341	138.572	5.46398e-32	3.14211e-29
qs_c5390	dna (cytosine-5)-methyltransferase drm2	490	5.41223e-65	0.926	P:regulation of gene expression, epigenetic; P:DNA metabolic process; F:DNA binding; F:transferase activity	EC:2.1.1.0	0	15	-5.44043	8.06095	132.189	1.36032e-30	6.04479e-28
qs_c21897	xyloglucan galactosyltransferase katamari1-like	499	1.86517e-86	0.825	C:membrane; C:Golgi apparatus; P:cellular component organization; P:cellular process; P:signal transduction; P:anatomical structure morphogenesis; P:cell growth; P:biosynthetic process; P:carbohydrate metabolic process; F:transferase activity	-	0	15	-5.35755	7.98166	126.208	2.76911e-29	1.04118e-26
qs_c14517	sn1-specific diacylglycerol lipase beta-like	592	1.82939e-72	0.7785	P:transport; P:cellular component organization; P:cellular process; C:cytoplasm; P:catabolic process; P:lipid metabolic process; F:hydrolase activity	EC:3.1.1.3	0	16	-5.35755	7.05322	78.87	6.63343e-19	8.20866e-17
qs_c10437	protein	526	1.68426e-32	0.781	F:molecular_function; P:biological_process; C:cellular_component; C:plastid		0	7	-5.35755	6.18648	47.2326	6.30424e-12	2.74522e-10
qs_rep_c36185	hypothetical protein VITISV_041623	349	3.51857e-27	0.691	P:DNA metabolic process; P:protein metabolic process; F:nucleic acid binding; P:biosynthetic process; P:cellular process; C:intracellular; F:catalytic activity	-	0	48	-5.35321	8.94032	187.373	1.19036e-42	2.586e-39
qs_c11879	plastidic aldolase	471	6.94356e-95	0.965	C:plastid; C:ribosome; P:biological_process; C:thylakoid; P:response to endogenous stimulus; P:generation of precursor metabolites and energy; P:carbohydrate metabolic process; P:catabolic process; F:catalytic activity; C:membrane; C:extracellular region; C:mitochondrion	EC:4.1.2.13	0	8	-5.3409	7.03762	78.0432	1.00812e-18	1.19459e-16
qs_c125729	probable pectinesterase pectinesterase inhibitor 12-like	417	2.51529e-41	0.7025	F:hydrolase activity; C:cell wall; P:metabolic process	-	0	16	-5.3409	7.03762	78.0432	1.00812e-18	1.19459e-16
qs_c11694	ubiquitin carboxyl-terminal hydrolase 12-like	471	1.63754e-08	0.9685	F:hydrolase activity; P:protein metabolic process; P:catabolic process; P:cellular process; P:DNA metabolic process; F:DNA binding	EC:3.1.2.15	0	8	-5.32405	7.02185	77.2131	1.53472e-18	1.74154e-16
qs_c18266	transmembrane protein 234 homolog	525	6.84224e-44	0.7435	C:membrane	-	0	14	-5.18563	7.81784	114.339	1.09825e-26	3.35514e-24
qs_c21900	peptidyl-prolyl cis-trans isomerase chloroplastic-like	442	2.12257e-48	0.8885	P:metabolic process; P:cellular protein modification process; P:protein metabolic process; P:cellular process; C:membrane; F:catalytic activity; F:binding; P:biosynthetic process; P:carbohydrate metabolic process; F:transferase activity; C:endoplasmic reticulum; C:thylakoid; C:plastid	EC:5.2.1.8; EC:2.4.1.119	0	12	-5.18563	7.81784	114.339	1.09825e-26	3.35514e-24
qs_c10818	conserved hypothetical protein	432	4.16662e-55	0.7815	F:molecular_function; P:biological_process; P:response to brassinosteroid stimulus		0	8	-5.16284	6.87161	69.5911	7.29644e-17	6.63535e-15
qs_c20708	probable protein abil5-like	475	4.43192e-50	0.6455	C:cytoplasm; C:cytoskeleton		0	12	-5.14667	7.78084	111.751	4.05164e-26	1.18235e-23
qs_c7658	protein transparent testa 12-like	468	1.66716e-52	0.8935	P:transport; P:cellular process; C:membrane; F:transporter activity; P:fruit ripening	-	0	13	-5.1353	8.0763	127.952	1.15e-29	4.49697e-27
qs_c20135	pentatricopeptide repeat-containing protein	466	2.36133e-41	0.6025	F:molecular_function; P:biological_process; C:endoplasmic reticulum; C:mitochondrion		0	12	-5.10662	7.74288	109.13	1.52007e-25	4.18597e-23
qs_c22928	cytochrome c subunit vib family protein	439	6.05124e-57	0.8525	F:catalytic activity; F:transporter activity; C:mitochondrion	EC:1.9.3.1	0	16	-5.10662	7.74288	109.13	1.52007e-25	4.18597e-23
qs_c19142	potassium transporter	467	1.50751e-62	0.926	F:transporter activity; C:plastid; C:membrane	-	0	12	-5.06544	7.70388	106.475	5.80195e-25	1.57555e-22
qs_rep_c35607	hydrolase -like	212	5.11206e-06	0.85	-		0	37	-5.05512	8.65361	161.018	6.78003e-37	6.65688e-34
qs_c4739	nitrate transporter -like	471	2.35753e-63	0.8765	P:transport; P:response to biotic stimulus; C:plasma membrane; F:transporter activity	-	1	27	-5.03573	8.94869	179.235	7.12005e-41	1.16009e-37
qs_c18271	hat family dimerisation domain containing protein	485	3.80991e-16	0.754	F:transferase activity; P:cellular protein modification process; F:binding; F:kinase activity; C:plastid; F:DNA binding; F:nucleotide binding; F:protein binding; ; P:biosynthetic process; P:cellular process; P:lipid metabolic process	EC:2.7.7.6; EC:2.7.11.0; EC:2.3.3.10	0	12	-5.02304	7.66381	103.786	2.25396e-24	5.50867e-22
qs_c4479	3-ketodihydrosphingosine reductase-like	375	8.19487e-42	0.7285	P:metabolic process	-	0	13	-5.02304	7.66381	103.786	2.25396e-24	5.50867e-22
qs_c5451	pentatricopeptide repeat-containing protein mitochondrial-like	498	3.2732e-79	0.774	F:molecular_function; P:biological_process; C:cellular_component		0	13	-5.01224	7.65361	103.108	3.17328e-24	7.56633e-22
qs_c18125	ion channel dmi1- chloroplast expressed	489	6.65641e-09	0.8122	C:membrane; C:nuclear envelope; P:transport; C:plastid; F:transporter activity; F:nucleotide binding	-	0	12	-4.97936	7.62258	101.062	8.91593e-24	1.91565e-21
qs_c22030	atp binding	271	5.86447e-18	0.9205	F:kinase activity; P:cellular protein modification process; F:nucleotide binding; C:plastid; F:structural molecule activity	-	0	13	-4.97936	7.62258	101.062	8.91593e-24	1.91565e-21
qs_c122734	casparian strip membrane protein 1-like	374	2.30912e-12	0.8575	C:membrane; P:cellular component organization; P:cellular process; C:plasma membrane	-	0	13	-4.93432	7.58015	98.3016	3.59277e-23	7.09554e-21
qs_c20631	acetolactate synthase small subunit	473	6.67755e-11	0.6585	P:biosynthetic process; P:carbohydrate metabolic process; P:cellular process; P:protein metabolic process; P:catabolic process; P:cellular component organization; ; F:transferase activity; C:cytosol	-	0	11	-4.93432	7.58015	98.3016	3.59277e-23	7.09554e-21
qs_rep_c56384	f-box protein at1g78280-like	312	9.08697e-19	0.6865	F:transferase activity; P:signal transduction; P:biological_process; P:response to stress; C:cytosol;	-	0	37	-4.91341	8.83147	168.3	1.73974e-38	2.42967e-35
qs_c14739	pentatricopeptide repeat-containing protein at4g21300-like	454	6.43483e-77	0.835	C:mitochondrion	-	0	11	-4.88782	7.53643	95.5046	1.47548e-22	2.72156e-20
qs_c11364	nuclear matrix protein 1	206	3.55153e-20	0.867	F:protein binding; C:cytoplasm; C:cytoskeleton	-	0	7	-4.86964	6.60152	57.1668	4.00372e-14	2.57502e-12
qs_c5277	acyl- n-acyltransferase with ring fyve phd-type zinc finger domain	723	4.40795e-25	0.6727	F:protein binding; P:cellular component organization; P:cellular protein modification process; P:cell-cell signaling; F:transferase activity; ; F:binding; F:DNA binding; P:regulation of gene expression, epigenetic; P:nucleobase-containing compound metabolic process; C:plasma membrane; P:DNA metabolic process; C:nucleus; P:response to stress; P:response to biotic stimulus	EC:2.3.1.48	0	21	-4.86964	6.60152	57.1668	4.00372e-14	2.57502e-12
qs_rep_c36577	protein	296	2.05728e-21	0.949	F:transferase activity	-	0	34	-4.84877	8.45657	143.992	3.56726e-33	2.24991e-30
qs_c22751	auxin influx carrier component	442	3.71791e-85	0.979	P:response to biotic stimulus; F:transporter activity; P:transport; P:response to endogenous stimulus; C:membrane; P:anatomical structure morphogenesis; P:post-embryonic development; P:multicellular organismal development	-	0	10	-4.82751	7.47984	91.9553	8.8656e-22	1.48154e-19
qs_c6385	beta-galactosidase 16-like	387	4.26206e-32	0.6675	F:hydrolase activity; P:metabolic process	-	0	12	-4.82751	7.47984	91.9553	8.8656e-22	1.48154e-19
qs_c10848	pentatricopeptide repeat-containing protein chloroplastic-like	367	4.09781e-39	0.7945	P:nucleobase-containing compound metabolic process; P:reproduction; P:cell differentiation; P:multicellular organismal development; C:mitochondrion	-	0	7	-4.82243	6.55845	55.3328	1.01754e-13	6.12152e-12
qs_c22343	auxin-induced protein 5ng4	552	1.35076e-13	0.715	C:membrane		0	12	-4.81514	7.46825	91.2382	1.27374e-21	2.07535e-19
qs_c19501	c-myc-binding protein	445	8.4466e-43	0.848	F:molecular_function; P:biological_process; C:cellular_component		0	10	-4.79008	7.4448	89.7968	2.63921e-21	4.06314e-19
qs_c56416	glutamyl-trna amidotransferase subunit chloroplastic mitochondrial-like	434	4.2558e-67	0.859	P:nucleobase-containing compound metabolic process; P:translation; ; C:mitochondrion; F:catalytic activity; F:nucleotide binding; F:transferase activity; C:plastid	EC:6.3.5.7	0	11	-4.76457	7.42095	88.3455	5.49646e-21	8.20357e-19
qs_rep_c37001	sugar transporter erd6-like 16-like	445	1.12129e-57	0.844	F:transporter activity; C:membrane; F:catalytic activity; P:metabolic process; P:transport; P:cellular process	EC:1.3.1.74	0	15	-4.75981	8.37204	136.97	1.22397e-31	6.29767e-29
qs_rep_c38351	metal tolerance protein 10-like	293	1.93921e-22	0.782	C:membrane; F:transporter activity; P:transport; P:cellular process	-	0	29	-4.75981	8.37204	136.97	1.22397e-31	6.29767e-29
qs_rep_c35509	npr1-1 protein	570	3.52106e-58	0.8235	P:response to stress; P:response to biotic stimulus; C:nucleus	-	1	32	-4.74664	8.35955	135.948	2.04875e-31	1.0271e-28
qs_c10505	glutamate dehydrogenase	538	8.6901e-27	0.9475	P:response to abiotic stimulus; F:binding; P:metabolic process; P:response to stress; F:catalytic activity; F:nucleotide binding; ; C:mitochondrion; P:biological_process	EC:1.4.1.3; EC:1.4.1.2	0	5	-4.74296	5.64334	30.4894	3.35688e-08	7.39118e-07
qs_c20891	atofp17 ofp17	372	2.27976e-54	0.7475	; C:plastid	-	0	11	-4.7386	7.3967	86.8842	1.15063e-20	1.66645e-18
qs_c8897	no exine formation 1	542	9.63448e-68	0.8605	C:plastid; C:membrane	-	1	20	-4.73228	8.65872	152.747	4.35089e-35	3.86675e-32
qs_c20712	sodium pyruvate cotransporter chloroplastic-like	440	1.93539e-42	0.9555	P:transport; C:membrane; C:plastid; F:transporter activity; P:carbohydrate metabolic process; P:cellular process; P:biosynthetic process; C:thylakoid; P:secondary metabolic process; P:biological_process	-	0	11	-4.72544	7.38442	86.1498	1.66805e-20	2.36331e-18
qs_c22990	probable lrr receptor-like serine threonine-protein kinase at3g47570-like	511	4.79544e-44	0.731	P:biological_process; F:kinase activity; P:response to stress; F:catalytic activity; F:nucleotide binding; P:metabolic process; P:cellular process; P:signal transduction; C:cell; C:membrane	EC:2.7.11.0	0	11	-4.72544	7.38442	86.1498	1.66805e-20	2.36331e-18
qs_c10812	wd repeat-containing protein 48-like	477	7.62134e-37	0.8485	P:transport; P:cellular component organization; P:cellular process; C:intracellular; F:kinase activity; P:anatomical structure morphogenesis; P:post-embryonic development; P:catabolic process; P:lipid metabolic process; F:nucleotide binding; P:biosynthetic process; P:cellular protein modification process; P:carbohydrate metabolic process	EC:2.7.11.7	0	6	-4.72311	6.46825	51.6193	6.73748e-13	3.50404e-11
qs_c11241	e3 ubiquitin-protein ligase xbat35	450	1.02014e-36	0.7625	C:cytoplasm; P:cellular protein modification process; F:catalytic activity; C:nucleus; F:binding	EC:6.3.2.19	0	6	-4.72311	6.46825	51.6193	6.73748e-13	3.50404e-11
qs_c11885	dna polymerase eta	532	6.66349e-92	0.9155	P:DNA metabolic process; P:biosynthetic process; F:transferase activity; P:carbohydrate metabolic process; P:cellular process; P:response to abiotic stimulus; F:protein binding; F:DNA binding; P:response to stress	EC:2.7.7.7	0	8	-4.72311	6.46825	51.6193	6.73748e-13	3.50404e-11
qs_rep_c36941	protein	524	1.11625e-60	0.7395	-		0	15	-4.72266	8.15068	123.885	8.92538e-29	3.23165e-26
qs_c14797	duf246 domain-containing protein at1g04910-like	438	1.78093e-43	0.871	C:Golgi apparatus	-	0	11	-4.69876	7.35955	84.6735	3.51944e-20	4.77862e-18
qs_c10718	magnesium-protoporphyrin o-methyltransferase-like	445	7.27544e-12	0.7827	C:plastid; P:biosynthetic process; P:cellular process; P:metabolic process; C:membrane; C:thylakoid; F:transferase activity	EC:2.1.1.11	0	6	-4.69717	6.4448	50.6814	1.08645e-12	5.50317e-11
qs_c22586	#NAME?	529	3.10267e-90	0.892	C:membrane; C:vacuole; P:biosynthetic process; P:lipid metabolic process; P:metabolic process; P:cellular process; C:plasma membrane; F:transferase activity	EC:2.1.1.140	0	11	-4.68523	7.34695	83.9314	5.12238e-20	6.85978e-18
qs_rep_c37324	linoleate 13s-lipoxygenase 3- chloroplastic-like	327	1.52631e-31	0.7485	P:response to stress; P:response to endogenous stimulus; P:biological_process; P:response to biotic stimulus; F:binding; P:response to external stimulus; P:growth; P:flower development; P:biosynthetic process; P:cellular process; P:lipid metabolic process; C:thylakoid; P:multicellular organismal development; F:catalytic activity; C:plastid; P:signal transduction	EC:1.13.11.12	0	26	-4.66501	8.28224	129.702	4.76147e-30	1.98077e-27
qs_rep_c36169	uncharacterized calcium-binding protein at1g02270-like	467	3.34968e-86	0.8685	F:binding	-	1	23	-4.65334	8.84049	161.009	6.80941e-37	6.65688e-34
qs_c18517	glycoprotein 3-alpha-l-fucosyltransferase a	483	1.05228e-10	0.8985	C:membrane; C:Golgi apparatus; F:transferase activity; P:biosynthetic process; P:cellular protein modification process; P:carbohydrate metabolic process	EC:2.4.1.214; EC:2.4.1.152	0	9	-4.6298	7.29542	80.9375	2.32974e-19	2.97719e-17
qs_c35493	armadillo beta-catenin-like repeat-containing protein	678	6.88349e-44	0.789	P:response to stress; P:response to abiotic stimulus; P:nucleobase-containing compound metabolic process; P:catabolic process	-	1	37	-4.6298	7.29542	80.9375	2.32974e-19	2.97719e-17
qs_rep_c36205	core-2 i-branching beta- -n-acetylglucosaminyltransferase family protein	439	7.50913e-20	0.815	C:membrane; F:transferase activity; C:Golgi apparatus	-	0	25	-4.62239	8.24198	126.507	2.38102e-29	9.12819e-27
qs_c14874	sucrose transport protein suc3-like	480	2.21073e-65	0.714	C:integral to membrane; P:transmembrane transport		0	9	-4.60126	7.26895	79.4248	5.00933e-19	6.23837e-17
qs_c22243	phospholipase a2-alpha	410	1.82747e-34	0.74	C:vacuole; F:hydrolase activity; C:Golgi apparatus; P:catabolic process; P:lipid metabolic process; P:cellular process; F:binding; C:extracellular region	EC:3.1.1.4	0	10	-4.60126	7.26895	79.4248	5.00933e-19	6.23837e-17
qs_c2249	abc transporter g family member 31-like	498	8.68826e-68	0.853	F:hydrolase activity; F:transporter activity; P:transport; P:cellular process; C:plasma membrane; P:nucleobase-containing compound metabolic process; P:catabolic process; F:nucleotide binding; C:membrane	EC:3.6.3.28	1	20	-4.57919	8.36581	132.119	1.40932e-30	6.12336e-28
qs_c125756	dt1	493	2.12425e-57	0.911	P:biological_process; P:flower development; P:transport; P:cellular process; P:reproduction; P:post-embryonic development; C:cellular_component; C:vacuole; C:plasma membrane	-	0	9	-4.57215	7.24198	77.9015	1.08308e-18	1.25534e-16
qs_c20015	lycopene beta-cyclase	622	3.73078e-87	0.848	C:plastid; F:catalytic activity; P:biosynthetic process; P:cellular process; P:secondary metabolic process; P:lipid metabolic process; P:metabolic process	EC:5.3.99.8	0	11	-4.56	6.32141	45.9339	1.22312e-11	5.02403e-10
qs_rep_c44471	esterase lipase thioesterase	477	5.53359e-09	0.6865	F:catalytic activity; C:peroxisome	-	0	13	-4.54083	8.16511	120.521	4.86557e-28	1.69878e-25
qs_c22888	pentatricopeptide repeat-containing protein at3g09060-like	412	6.66834e-45	0.7105	F:binding	-	0	9	-4.4967	7.17227	74.0462	7.63089e-18	7.97856e-16
qs_c20521	multidrug resistance protein abc transporter family	274	3.84468e-14	0.9375	P:transport; P:cellular process; F:receptor activity; C:mitochondrion; P:response to stress; P:response to abiotic stimulus; C:membrane; F:hydrolase activity; F:transporter activity; C:vacuole; P:nucleobase-containing compound metabolic process; P:catabolic process; F:nucleotide binding; P:cellular homeostasis; C:plasma membrane	-	0	9	-4.48113	7.15791	73.267	1.13246e-17	1.16536e-15
qs_c23060	beta-ketoacyl-acp synthase ii	490	1.40237e-85	0.9205	P:biosynthetic process; P:cellular process; P:lipid metabolic process; P:reproduction; P:post-embryonic development; P:embryo development; F:transferase activity; P:response to stress; P:response to abiotic stimulus	EC:2.3.1.41	0	10	-4.48113	7.15791	73.267	1.13246e-17	1.16536e-15
qs_rep_c36190	replication factor c subunit 1-like	627	4.93877e-27	0.6053	P:response to stress; P:regulation of gene expression, epigenetic; ; P:cellular component organization; P:cellular protein modification process; P:response to endogenous stimulus; F:catalytic activity; F:binding	-	0	20	-4.47692	7.45657	85.4799	2.34072e-20	3.24579e-18
qs_rep_c36232	glycine-rich protein	398	8.24658e-17	0.944	C:vacuole; C:plasma membrane; P:biosynthetic process; P:cellular protein modification process; P:carbohydrate metabolic process	-	0	20	-4.47049	8.09902	115.492	6.14031e-27	1.96812e-24
qs_c20149	white-brown-complex abc transporter family	320	2.00544e-49	0.9335	F:hydrolase activity; F:transporter activity; P:nucleobase-containing compound metabolic process; P:catabolic process; F:nucleotide binding; C:membrane	-	0	9	-4.46538	7.14341	72.485	1.68306e-17	1.67041e-15
qs_c20186	kinesin-like protein kif18b-like	400	1.8006e-34	0.792	P:cellular process; F:nucleotide binding; F:motor activity; C:cytoskeleton	-	0	9	-4.46538	7.14341	72.485	1.68306e-17	1.67041e-15
qs_c18961	peptidyl-prolyl cis-trans isomerase chloroplastic-like	441	3.95468e-13	0.675	P:protein metabolic process; P:cellular process; C:thylakoid; C:plastid; F:binding; P:cellular protein modification process; F:catalytic activity; C:membrane	EC:5.2.1.8	0	9	-4.44946	7.12877	71.7003	2.505e-17	2.40087e-15
qs_c20180	transcription factor pcf5	491	1.63104e-70	0.8215	P:cellular component organization; P:cellular process; P:response to biotic stimulus; ; P:post-embryonic development; P:multicellular organismal development; P:reproduction; P:signal transduction; P:response to stress	-	0	10	-4.44946	7.12877	71.7003	2.505e-17	2.40087e-15
qs_c4881	inter-alpha-trypsin inhibitor heavy	485	7.70941e-62	0.811	C:plasma membrane	-	0	8	-4.44946	7.12877	71.7003	2.505e-17	2.40087e-15
qs_c10864	39s ribosomal protein l41- mitochondrial-like	522	5.20219e-49	0.9	F:molecular_function; P:biological_process; C:cellular_component		0	7	-4.44001	6.2145	42.0665	8.82217e-11	3.17663e-09
qs_c23139	u-box domain-containing protein 31-like	642	6.44017e-40	0.9205	F:catalytic activity; C:intracellular; P:cellular protein modification process	EC:6.3.2.19	0	10	-4.44001	6.2145	42.0665	8.82217e-11	3.17663e-09
qs_c15531	mct-1 like pua rna binding-domain containing protein	252	4.84825e-27	0.978	C:ribosome; F:structural molecule activity; F:RNA binding; P:translation	-	0	9	-4.41709	7.09902	70.1224	5.57365e-17	5.16474e-15
qs_c16234	retrotransposon like protein	453	3.49948e-43	0.7265	F:nucleic acid binding; F:binding; P:DNA metabolic process	-	0	8	-4.41709	7.09902	70.1224	5.57365e-17	5.16474e-15
qs_c20114	small multi-drug export protein	512	1.94189e-83	0.8325	C:plastid; C:membrane	-	0	10	-4.41709	7.09902	70.1224	5.57365e-17	5.16474e-15
qs_c127308	probable aspartic protease at2g35615-like	416	6.35781e-45	0.722	P:response to stress; P:response to biotic stimulus; P:metabolic process; P:cellular process; F:hydrolase activity; P:protein metabolic process; P:catabolic process; C:extracellular region	EC:3.4.23.0	0	9	-4.40062	7.08391	69.3293	8.33235e-17	7.50756e-15
qs_c15370	uncharacterized loc101222732	466	3.40614e-33	0.6915	C:membrane; F:transferase activity	-	0	8	-4.40062	7.08391	69.3293	8.33235e-17	7.50756e-15
qs_c123136	pentatricopeptide repeat-containing protein mitochondrial-like	378	1.61476e-53	0.8225	P:cellular component organization; P:cellular protein modification process; F:catalytic activity; C:mitochondrion; P:flower development; P:nucleobase-containing compound metabolic process; P:biosynthetic process; C:membrane	-	0	9	-4.38397	7.06865	68.5333	1.2475e-16	1.09045e-14
qs_c21294	protein	554	1.1081e-39	0.6765	F:metal ion binding; P:metal ion transport		0	10	-4.37606	6.15791	40.1098	2.40078e-10	8.09312e-09
qs_c2870	upf0420 protein c16orf58 homolog	909	4.57708e-122	0.92	F:molecular_function; P:biological_process; C:cellular_component		0	24	-4.37606	6.15791	40.1098	2.40078e-10	8.09312e-09
qs_rep_c55115	serine threonine protein kinase	494	1.11492e-06	0.5305	F:binding; F:kinase activity; P:response to stress; P:response to abiotic stimulus; C:intracellular	-	0	13	-4.35817	7.80868	99.001	2.52379e-23	5.14012e-21
qs_c11015	dna binding partial	464	0.0706238	0.7567	F:nucleic acid binding	-	0	5	-4.30914	6.09902	38.138	6.59128e-10	2.04236e-08
qs_c11140	polyol transporter 2-like	455	2.39992e-24	0.8595	C:membrane; F:catalytic activity; C:Golgi apparatus; P:metabolic process; P:transport; P:cellular process; F:transporter activity	EC:1.3.1.74	0	5	-4.30914	6.09902	38.138	6.59128e-10	2.04236e-08
qs_c15356	dna-directed rna polymerase subunit beta	713	6.27085e-60	0.797	P:transport; P:cellular component organization; P:cellular process	-	0	15	-4.30914	6.09902	38.138	6.59128e-10	2.04236e-08
qs_c18972	adagio protein 3-like	727	2.58466e-123	0.8735	P:protein metabolic process; P:catabolic process; P:cellular process; F:signal transducer activity; ; P:flower development; P:biological_process; P:response to abiotic stimulus; F:catalytic activity; F:protein binding; P:signal transduction	EC:6.3.2.19	0	15	-4.30914	6.09902	38.138	6.59128e-10	2.04236e-08
qs_c22877	lysine-specific demethylase 5d	769	7.81234e-70	0.8095	P:carbohydrate metabolic process; P:cellular process; P:nucleobase-containing compound metabolic process; P:cellular protein modification process; P:metabolic process; F:binding; P:cell cycle; ; F:catalytic activity; P:reproduction; P:post-embryonic development; F:DNA binding; P:biosynthetic process; F:sequence-specific DNA binding transcription factor activity; F:transferase activity; C:nucleus	EC:1.14.11.0; EC:2.1.1.0	0	15	-4.30914	6.09902	38.138	6.59128e-10	2.04236e-08
qs_c104673	---NA---	241			-		0	3	-4.29768	5.26895	21.6774	3.22571e-06	4.14655e-05
qs_rep_c36785	oligoribonuclease	540	8.85025e-24	0.788	F:nucleic acid binding; C:intracellular; F:nuclease activity	-	0	13	-4.27694	7.73323	93.9125	3.29779e-22	5.86166e-20
qs_c7690	protein transparent testa 1-like	860	3.15533e-139	0.887	F:nucleic acid binding; C:nucleus; F:binding; P:pollination; P:anatomical structure morphogenesis; P:cellular component organization; P:cell differentiation; P:cell growth; P:multicellular organismal development	-	0	22	-4.27448	6.06865	37.1465	1.09577e-09	3.29102e-08
qs_rep_c53016	protein kinase domain-containing protein	478	1.07019e-76	0.981	C:plasma membrane; F:nucleotide binding; F:kinase activity; P:cellular protein modification process; P:signal transduction; F:signal transducer activity; F:protein binding	EC:2.7.10.0; EC:2.7.11.25	0	13	-4.2684	8.22142	116.556	3.59104e-27	1.1702e-24
qs_rep_c36531	acyl carrier protein	475	5.41013e-19	0.805	P:biosynthetic process; P:cellular process; P:lipid metabolic process; C:plastid; F:binding	-	0	12	-4.26419	7.90638	101.468	7.2631e-24	1.61373e-21
qs_rep_c44462	chloroplast rna-binding protein 29	332	1.67129e-13	0.85	F:RNA binding; P:generation of precursor metabolites and energy; P:photosynthesis; P:response to stress; P:response to biotic stimulus; P:response to abiotic stimulus; C:plastid; P:biological_process; P:response to endogenous stimulus; C:membrane; C:thylakoid; F:nucleotide binding; C:intracellular; P:biosynthetic process; P:cellular process	-	0	17	-4.26419	7.90638	101.468	7.2631e-24	1.61373e-21
qs_c23104	receptor protein	502	2.1849e-14	0.848	P:cellular protein modification process; P:biosynthetic process; P:cellular process; P:lipid metabolic process; F:kinase activity; P:catabolic process; C:intracellular; F:receptor activity; F:nucleotide binding; P:response to biotic stimulus; P:biological_process; P:response to stress; F:transferase activity; F:catalytic activity; C:plasma membrane	EC:2.7.11.0; EC:2.7.8.0; EC:2.7.10.2; EC:4.1.1.9	0	9	-4.24332	6.94032	62.0634	3.32569e-15	2.51057e-13
qs_c53020	haloacid dehalogenase-like hydrolase domain-containing protein	506	7.42823e-34	0.7	F:molecular_function; P:biological_process; C:cellular_component		0	9	-4.24332	6.94032	62.0634	3.32569e-15	2.51057e-13
qs_c6400	non-ltr retroelement reverse transcriptase	520	4.91245e-18	0.5405	F:RNA binding; F:nucleic acid binding; P:RNA-dependent DNA replication; F:ribonuclease H activity; F:RNA-directed DNA polymerase activity; F:zinc ion binding		0	9	-4.24332	6.94032	62.0634	3.32569e-15	2.51057e-13
qs_c23037	tmv resistance protein n-like	713	3.26829e-47	0.761	F:hydrolase activity; P:response to stress; F:nucleotide binding; P:signal transduction; C:intracellular	EC:3.6.1.15	0	14	-4.23897	6.03762	36.1514	1.82572e-09	5.151e-08
qs_rep_c36951	cbs domain-containing protein chloroplastic-like	228	7.70014e-19	0.8535	C:plastid	-	0	17	-4.20765	7.85391	97.8136	4.59688e-23	8.98782e-21
qs_c20269	hypothetical protein VITISV_026962	507	1.40613e-06	0.522	P:metabolic process; P:cellular process; F:binding; F:transferase activity	-	0	9	-4.2059	6.90638	60.4172	7.67397e-15	5.47597e-13
qs_c21203	at4g40080-like protein	534	4.85309e-30	0.707	P:biological_process; P:transport	-	0	9	-4.2059	6.90638	60.4172	7.67397e-15	5.47597e-13
qs_c6914	pullulanase chloroplastic-like	446	5.81697e-40	0.9435	P:carbohydrate metabolic process; P:nucleobase-containing compound metabolic process; P:catabolic process; P:secondary metabolic process; F:hydrolase activity; P:biosynthetic process; P:cellular process; P:cellular component organization; P:lipid metabolic process; C:plastid; F:binding	EC:3.2.1.142; EC:3.2.1.1; EC:3.2.1.41	0	7	-4.2059	6.90638	60.4172	7.67397e-15	5.47597e-13
qs_c20226	protein	641	1.33962e-26	0.548	F:kinase activity; P:phosphorylation; F:hydrolase activity; F:phosphoprotein phosphatase activity; F:receptor activity		0	9	-4.20256	6.00591	35.1525	3.04865e-09	8.30184e-08
qs_c7268	transcriptional adapter ada2-like	417	1.98825e-18	0.8345	P:nucleobase-containing compound metabolic process; F:binding; P:cell cycle; P:response to endogenous stimulus; F:DNA binding; P:catabolic process; F:transferase activity; P:response to stress; P:response to abiotic stimulus; F:protein binding; F:sequence-specific DNA binding transcription factor activity; P:regulation of gene expression, epigenetic; P:cellular component organization; ; P:cellula…	-	0	9	-4.19895	7.20056	70.7458	4.06346e-17	3.85674e-15
qs_c20204	ribosomal protein l19	492	2.01369e-43	0.898	C:nucleolus; F:structural molecule activity; C:plasma membrane; C:ribosome; C:cytosol; P:translation; C:mitochondrion	-	0	9	-4.18683	6.8891	59.5897	1.16844e-14	8.04415e-13
qs_c57936	u11 u12 small nuclear ribonucleoprotein 25 kda protein	483	1.50495e-49	0.788	F:nucleic acid binding; C:intracellular; C:plasma membrane	-	0	7	-4.18683	6.8891	59.5897	1.16844e-14	8.04415e-13
qs_c19593	adaptor protein kanadaptin	504	1.15058e-52	0.8945	C:plastid; C:membrane	-	0	9	-4.16749	6.87161	58.7593	1.78187e-14	1.18905e-12
qs_c19932	protein grpe	530	1.66083e-12	0.8427	P:protein metabolic process; P:cellular process; F:protein binding; C:mitochondrion; F:enzyme regulator activity; F:nucleotide binding; F:catalytic activity	-	0	9	-4.16749	6.87161	58.7593	1.78187e-14	1.18905e-12
qs_c23199	chaperone protein dnaj chloroplastic-like	478	1.20699e-25	0.691	F:unfolded protein binding; P:protein folding; F:heat shock protein binding; P:response to stress		0	7	-4.16749	6.87161	58.7593	1.78187e-14	1.18905e-12
qs_c23463	pathogenesis-related protein 1	469	2.25517e-62	0.806	C:extracellular region	-	0	7	-4.16749	6.87161	58.7593	1.78187e-14	1.18905e-12
qs_c11625	glycine-rich protein	535	6.64991e-21	0.8024	F:molecular_function; P:biological_process		0	6	-4.1652	5.97349	34.1501	5.10201e-09	1.30911e-07
qs_c12285	kinase interacting (kip1-like) protein	506	1.49841e-24	0.8755	F:kinase activity; P:metabolic process; P:cellular process	-	0	6	-4.1652	5.97349	34.1501	5.10201e-09	1.30911e-07
qs_c15413	conserved hypothetical protein	588	2.63256e-16	0.637	-		0	9	-4.1652	5.97349	34.1501	5.10201e-09	1.30911e-07
qs_c17654	ammonium transporter	653	1.87854e-46	0.7905	C:membrane; C:thylakoid; C:plastid; C:mitochondrion	-	0	9	-4.1652	5.97349	34.1501	5.10201e-09	1.30911e-07
qs_c18444	tmv resistance protein n-like	587	1.35834e-18	0.5705	P:defense response; F:ADP binding; P:signal transduction; C:intracellular		0	9	-4.1652	5.97349	34.1501	5.10201e-09	1.30911e-07
qs_c18864	hypothetical protein CARUB_v10009392mg	575	1.42415e-11	0.967	F:molecular_function; P:biological_process		0	9	-4.1652	5.97349	34.1501	5.10201e-09	1.30911e-07
qs_c101581	casein kinase i isoform delta-like protein	471	8.97243e-22	0.7405	P:biological_process; F:kinase activity; P:metabolic process; P:cellular process; F:nucleotide binding; C:cytoplasm; C:nucleus; C:plasma membrane; P:biosynthetic process; P:cellular protein modification process; P:carbohydrate metabolic process	-	0	3	-4.16099	5.15791	19.436	1.04026e-05	0.000115959
qs_c102029	udp-glycosyltransferase 83a1-like	489	8.08542e-52	0.831	F:transferase activity; P:metabolic process	EC:2.4.1.115	0	3	-4.16099	5.15791	19.436	1.04026e-05	0.000115959
qs_c102787	disease resistance protein rga4-like	467	2.43156e-09	0.543	P:defense response; F:ADP binding		0	3	-4.16099	5.15791	19.436	1.04026e-05	0.000115959
qs_c104592	coiled-coil domain-containing protein 75-like	462	1.33132e-10	0.876	F:nucleic acid binding; C:intracellular	-	0	3	-4.16099	5.15791	19.436	1.04026e-05	0.000115959
qs_rep_c51138	mip pip subfamily	629	1.83275e-113	0.9135	C:vacuole; P:response to stress; P:response to abiotic stimulus; P:transport; C:plasma membrane; P:response to endogenous stimulus; C:membrane; C:plastid; F:transporter activity	-	0	16	-4.15222	7.15791	68.4498	1.30152e-16	1.13099e-14
qs_rep_c49156	conserved hypothetical protein	514	7.63281e-25	0.8905	F:molecular_function; P:biological_process		0	12	-4.14582	7.61209	86.0498	1.75465e-20	2.46813e-18
qs_c18782	at5g60720 mup24_130	527	3.99755e-31	0.6674	P:cellular process; P:metabolic process; C:plastid	-	0	9	-4.12803	6.83599	57.0898	4.16358e-14	2.65167e-12
qs_c11282	uncharacterized loc101222087	543	3.7566e-43	0.6889	P:biological_process	-	0	6	-4.12686	5.94032	33.1442	8.5572e-09	2.10718e-07
qs_c14918	protein	564	3.55919e-27	0.8115	-		0	9	-4.12686	5.94032	33.1442	8.5572e-09	2.10718e-07
qs_c18717	glutamate-gated kainate-type ion channel receptor subunit 5	507	2.29177e-37	0.767	F:transporter activity; P:transport; F:receptor activity; C:membrane; P:signal transduction; C:external encapsulating structure	-	0	9	-4.10789	6.81784	56.2507	6.37961e-14	4.02368e-12
qs_rep_c127218	---NA---	212			-		0	15	-4.08746	7.74288	90.3155	2.03053e-21	3.20169e-19
qs_c15174	receptor-like serine threonine-protein kinase ale2-like	525	3.96975e-20	0.695	P:cellular protein modification process; F:nucleotide binding; F:kinase activity	EC:2.7.11.0	0	9	-4.08746	6.79946	55.4086	9.79067e-14	5.9821e-12
qs_c16677	splicing arginine serine-	457	6.38197e-10	0.7963	F:nucleic acid binding; C:mitochondrion; F:nucleotide binding; F:binding	-	0	7	-4.08746	6.79946	55.4086	9.79067e-14	5.9821e-12
qs_c11554	lrr receptor-like serine threonine-protein kinase fls2-like	760	4.85369e-50	0.698	-		0	13	-4.08746	5.90638	32.1348	1.43838e-08	3.32427e-07
qs_c14643	hva22-like protein a-like	700	6.93347e-87	0.908	P:response to endogenous stimulus; P:response to stress; P:response to abiotic stimulus	-	0	13	-4.08746	5.90638	32.1348	1.43838e-08	3.32427e-07
qs_c22297	cytochrome p450	488	3.15893e-21	0.666	C:cytoplasm; F:molecular_function; F:binding; F:catalytic activity; P:metabolic process	EC:1.14.13.76	1	13	-4.07906	8.04544	103.345	2.81601e-24	6.79736e-22
qs_rep_c36157	cytochrome p450 71a1-like	620	2.17287e-80	0.849	F:binding; F:catalytic activity; F:molecular_function; P:metabolic process	-	1	23	-4.04507	7.70388	87.7583	7.39622e-21	1.08934e-18
qs_c10516	abc transporter g family member 14-like	654	4.58095e-29	0.82	F:hydrolase activity; F:transporter activity; P:nucleobase-containing compound metabolic process; P:catabolic process; F:nucleotide binding; C:membrane	EC:3.6.3.28	0	5	-4.00998	5.03762	17.1833	3.39401e-05	0.000331633
qs_c20410	exocyst complex component 7-like	727	1.35735e-49	0.6605	C:cytoplasm	-	0	12	-4.00529	5.83599	30.106	4.09072e-08	8.67481e-07
qs_c23482	dna binding	644	2.70883e-61	0.749	F:sequence-specific DNA binding transcription factor activity; F:DNA binding;	-	0	8	-4.00529	5.83599	30.106	4.09072e-08	8.67481e-07
qs_c4247	dihydrofolate reductase-thymidylate synthase	1200	1.03429e-127	0.8465	P:biosynthetic process; P:cellular process; P:metabolic process; F:transferase activity; ; F:catalytic activity; P:nucleobase-containing compound metabolic process	EC:2.1.1.45; EC:1.5.1.3	2	48	-4.00529	5.83599	30.106	4.09072e-08	8.67481e-07
qs_c56793	dna mismatch repair protein msh5-like	567	6.26667e-90	0.8365	P:cellular component organization; P:response to stress; P:DNA metabolic process; F:hydrolase activity; P:response to abiotic stimulus; P:cell cycle; F:DNA binding; P:reproduction; P:biosynthetic process; P:cellular process; P:catabolic process; C:nucleus; C:intracellular; P:nucleobase-containing compound metabolic process; F:nucleotide binding	-	0	8	-4.00529	5.83599	30.106	4.09072e-08	8.67481e-07
qs_c62156	rint1-like	660	1.84352e-84	0.744	P:transport; P:cellular process; C:cytosol; C:membrane; C:endoplasmic reticulum	-	0	8	-4.00529	5.83599	30.106	4.09072e-08	8.67481e-07
qs_c23655	kelch repeat-containing protein at3g27220-like	253	1.25501e-12	0.893	C:cytoplasm; C:Golgi apparatus	-	0	7	-4.00273	6.72351	52.0112	5.51855e-13	2.98889e-11
qs_c57864	kinase-like protein	167	2.107e-15	0.792	F:receptor activity; C:plasma membrane; P:cellular protein modification process; F:nucleotide binding; F:catalytic activity; C:membrane; C:plastid; F:kinase activity; P:metabolic process	EC:1.3.1.74; EC:2.7.11.0	0	7	-4.00273	6.72351	52.0112	5.51855e-13	2.98889e-11
qs_c62683	---NA---	253			-		0	7	-4.00273	6.72351	52.0112	5.51855e-13	2.98889e-11
qs_rep_c48778	tpa: remorin isoform 1	377	0.000220368	0.8982	C:vacuole; F:carbohydrate binding; P:cell-cell signaling; P:transport; C:plasma membrane	-	0	16	-4.00123	7.82694	91.9092	9.07464e-22	1.50362e-19
qs_rep_c53727	elongation factor 1-alpha	516	4.66476e-31	0.915	C:nucleolus; C:vacuole; F:translation factor activity, nucleic acid binding; F:nucleotide binding; P:biological_process; C:plasma membrane; C:plastid; C:mitochondrion; P:translation	-	0	11	-3.98888	7.46825	77.2051	1.54095e-18	1.74154e-16
qs_c108900	psbp domain-containing protein chloroplastic-like	416	2.96932e-55	0.925	P:nucleobase-containing compound metabolic process; P:carbohydrate metabolic process; P:catabolic process; P:secondary metabolic process; P:response to abiotic stimulus; P:biosynthetic process; P:cellular process; P:cellular component organization; P:photosynthesis; F:binding; C:membrane; C:thylakoid; C:plastid;	-	0	4	-3.96239	5.79946	29.0867	6.92097e-08	1.43803e-06
qs_c15587	beta-glucosidase 47-like	413	1.0443e-46	0.7805	F:hydrolase activity; P:carbohydrate metabolic process; F:binding; C:cytoplasm; C:membrane	EC:3.2.1.0	0	7	-3.95842	6.68398	50.295	1.32286e-12	6.59812e-11
qs_c18833	racemase and acting on amino acids and	268	5.55762e-18	0.574	F:catalytic activity	-	0	7	-3.95842	6.68398	50.295	1.32286e-12	6.59812e-11
qs_c19379	diacylglycerol o-acyltransferase 2-like	298	6.67825e-15	0.868	F:transferase activity; P:metabolic process	EC:2.3.1.20	0	7	-3.95842	6.68398	50.295	1.32286e-12	6.59812e-11
qs_c23537	unnamed protein product	314	5.77691e-11	0.7443	P:response to stress; P:response to endogenous stimulus; F:DNA binding; P:cellular process	-	0	7	-3.95842	6.68398	50.295	1.32286e-12	6.59812e-11
qs_c58982	dna replication licensing factor mcm5-a-like	468	1.49722e-82	0.9255	P:cell cycle; P:DNA metabolic process; P:biosynthetic process; P:metabolic process; P:flower development; P:cellular component organization; P:cellular protein modification process; F:DNA binding; F:catalytic activity; F:nucleotide binding; F:hydrolase activity; P:cellular process; C:cytoplasm; P:regulation of gene expression, epigenetic; C:nucleus	-	0	6	-3.95842	6.68398	50.295	1.32286e-12	6.59812e-11
qs_c66559	probable atp-dependent rna helicase dhx37-like	450	1.18266e-09	0.7675	F:hydrolase activity; F:nucleotide binding	-	0	6	-3.95842	6.68398	50.295	1.32286e-12	6.59812e-11
qs_c12511	brain protein 44-like protein	616	2.76608e-36	0.782	P:generation of precursor metabolites and energy; P:biological_process; C:plasma membrane; C:membrane; C:vacuole; P:carbohydrate metabolic process; P:catabolic process; P:response to stress; P:DNA metabolic process; C:mitochondrion	-	0	8	-3.91816	5.76199	28.0644	1.17344e-07	2.26039e-06
qs_c13687	serine threonine protein phosphatase 2a 57 kda regulatory subunit b beta isoform-like	656	3.04071e-98	0.8085	F:enzyme regulator activity; C:intracellular; P:signal transduction; P:transport; P:cellular process; C:membrane	-	0	8	-3.91816	5.76199	28.0644	1.17344e-07	2.26039e-06
qs_c20202	cyclin-dependent kinase f-1-like	661	2.75406e-102	0.8205	P:cell cycle; F:protein binding; F:kinase activity; P:anatomical structure morphogenesis; P:cell differentiation; P:multicellular organismal development; P:post-embryonic development; P:cellular process; P:metabolic process; C:cytosol; P:DNA metabolic process; P:biosynthetic process; C:nucleus; F:nucleotide binding; F:enzyme regulator activity	EC:2.7.11.14; EC:2.7.11.22; EC:2.7.10.0	0	11	-3.91816	5.76199	28.0644	1.17344e-07	2.26039e-06
qs_c12478	xylem serine proteinase 1-like	425	2.02651e-52	0.8305	F:protein binding; C:cell wall; F:hydrolase activity; F:catalytic activity; C:extracellular region; P:protein metabolic process; P:catabolic process; P:biological_process; P:metabolic process	EC:3.4.21.0; EC:1.3.1.74	0	7	-3.91271	6.64334	48.5672	3.19157e-12	1.45798e-10
qs_c15501	hypothetical protein PRUPE_ppa000354mg	356	6.29766e-16	0.796	C:cytosol; C:vacuole; C:plasma membrane	-	0	7	-3.91271	6.64334	48.5672	3.19157e-12	1.45798e-10
qs_c39680	protein	474	3.71403e-45	0.6855	-		0	6	-3.91271	6.64334	48.5672	3.19157e-12	1.45798e-10
qs_c58519	#NAME?	483	2.06716e-58	0.914	F:catalytic activity; P:metabolic process; C:plastid	EC:4.1.3.30	0	6	-3.91271	6.64334	48.5672	3.19157e-12	1.45798e-10
qs_c58703	dna repair and recombination protein	483	3.60032e-38	0.8905	F:hydrolase activity; F:DNA binding; C:cytoplasm; F:nucleotide binding; F:transferase activity; P:response to abiotic stimulus; P:response to stress; P:DNA metabolic process	-	0	6	-3.91271	6.64334	48.5672	3.19157e-12	1.45798e-10
qs_c6057	protein	675	1.56082e-108	0.7535	C:cell wall	-	1	21	-3.91271	6.64334	48.5672	3.19157e-12	1.45798e-10
qs_c9962	sec14-like 3 protein	486	7.68188e-26	0.895	F:transporter activity; C:intracellular; P:anatomical structure morphogenesis; P:cellular component organization; P:cell differentiation; P:cell growth; P:multicellular organismal development; P:transport; P:flower development	-	0	8	-3.91081	7.18648	65.5381	5.70007e-16	4.74246e-14
qs_c7851	dual-specificity phosphatase 3	447	5.27378e-13	0.844	P:cellular protein modification process; F:hydrolase activity; P:carbohydrate metabolic process; P:cellular process; P:catabolic process; P:biosynthetic process; C:plastid; P:biological_process	EC:3.1.3.23	0	8	-3.89507	7.17227	64.7841	8.3571e-16	6.86546e-14
qs_c9159	probably inactive leucine-rich repeat receptor-like protein kinase at5g48380-like	439	4.81638e-18	0.663	F:transferase activity	-	0	8	-3.89507	7.17227	64.7841	8.3571e-16	6.86546e-14
qs_c28873	dna repair and recombination protein rad54-like	476	1.33638e-84	0.9035	P:cellular component organization; P:response to stress; P:DNA metabolic process; P:response to abiotic stimulus; P:reproduction; P:post-embryonic development; F:DNA binding; P:cellular protein modification process; F:nucleotide binding; F:transferase activity; P:cell cycle; F:protein binding; F:hydrolase activity;	-	0	6	-3.8893	6.62258	47.699	4.96934e-12	2.17849e-10
qs_c29378	ac007202_19 est gb	454	5.39153e-41	0.825	F:molecular_function; P:biological_process		0	6	-3.8893	6.62258	47.699	4.96934e-12	2.17849e-10
qs_c6556	predicted protein	531	6.10065e-07	0.7657	F:molecular_function; P:biological_process; C:cellular_component		0	8	-3.8893	6.62258	47.699	4.96934e-12	2.17849e-10
qs_rep_c44870	wd-40 repeat-containing protein msi1-like	402	6.68773e-08	0.89	F:transferase activity; C:nucleus; P:cellular component organization; P:cellular protein modification process	EC:2.3.1.48	0	12	-3.87396	7.54748	77.9003	1.08378e-18	1.25534e-16
qs_c11483	protein transparent testa 12-like	459	1.18346e-22	0.7555	P:transport; P:cellular process; C:membrane; F:transporter activity; P:fruit ripening	-	0	4	-3.87254	5.72351	27.0392	1.99372e-07	3.74459e-06
qs_c27707	cytokinin biosynthetic isopentenyltransferase	488	1.68167e-35	0.8025	F:transferase activity; P:nucleobase-containing compound metabolic process; F:nucleotide binding; P:pollination; P:anatomical structure morphogenesis; P:cellular component organization; P:cell differentiation; P:cell growth; P:multicellular organismal development; P:biosynthetic process; P:cellular process	EC:2.5.1.27	0	6	-3.8655	6.60152	46.828	7.74984e-12	3.35232e-10
qs_c57075	rna recognition motif-containing protein	490	3.85937e-07	0.6175	F:binding	-	0	8	-3.8655	6.60152	46.828	7.74984e-12	3.35232e-10
qs_c5825	coiled-coil domain-containing protein 132-like	539	2.1879e-27	0.8005	P:biosynthetic process; P:cellular protein modification process; P:carbohydrate metabolic process	-	0	8	-3.8655	6.60152	46.828	7.74984e-12	3.35232e-10
qs_c23981	elmo domain-containing protein a-like	489	4.6079e-90	0.9515	C:cytoskeleton; P:transport; P:cellular component organization; P:cellular process	-	0	6	-3.8413	6.58015	45.9541	1.21056e-11	5.02403e-10
qs_c25556	ribosomal protein s18	463	2.91369e-70	0.927	C:ribosome; C:plastid; P:translation; F:RNA binding; ; F:structural molecule activity; P:cellular component organization; P:generation of precursor metabolites and energy; P:photosynthesis	-	0	6	-3.8413	6.58015	45.9541	1.21056e-11	5.02403e-10
qs_c101236	b3 domain-containing protein os01g0234100-like	508	1.53413e-29	0.774	F:DNA binding; C:nucleus;	-	0	3	-3.8413	4.90638	14.9229	0.000111995	0.000910493
qs_c10416	proline synthase co-transcribed bacterial homolog	992	1.39821e-104	0.9	F:binding; P:biosynthetic process; P:carbohydrate metabolic process; P:cellular process	-	1	14	-3.8413	4.90638	14.9229	0.000111995	0.000910493
qs_c10983	short-chain dehydrogenase reductase family protein	524	1.57031e-18	0.879	F:transferase activity; F:nucleotide binding; P:metabolic process	EC:1.1.1.100	0	5	-3.82543	5.68398	26.0112	3.39444e-07	5.81157e-06
qs_c11508	translational activator gcn1-like	522	4.62174e-79	0.9345	C:membrane; C:cytosol; P:response to stress; P:response to biotic stimulus; C:nucleus	-	0	5	-3.82543	5.68398	26.0112	3.39444e-07	5.81157e-06
qs_c11981	protein	505	6.36421e-47	0.9515	C:cytoplasm; F:hydrolase activity; P:cellular protein modification process	-	0	5	-3.82543	5.68398	26.0112	3.39444e-07	5.81157e-06
qs_c12080	2og-fe oxygenase family protein	518	1.07103e-38	0.73	P:metabolic process; F:catalytic activity	EC:1.13.11.0; EC:1.14.11.0	0	5	-3.82543	5.68398	26.0112	3.39444e-07	5.81157e-06
qs_c12263	conserved oligomeric golgi complex subunit 1-like	500	7.91984e-54	0.7725	P:cellular protein modification process; P:biosynthetic process; P:cellular process; C:cytosol; P:reproduction; P:post-embryonic development	-	0	5	-3.82543	5.68398	26.0112	3.39444e-07	5.81157e-06
qs_c126448	cytochrome p450	510	5.79478e-40	0.7895	F:binding; F:molecular_function; P:metabolic process; F:catalytic activity	EC:1.14.13.71	0	5	-3.82543	5.68398	26.0112	3.39444e-07	5.81157e-06
qs_c13942	f2-like protein	503	3.62714e-33	0.728	F:catalytic activity	-	0	5	-3.82543	5.68398	26.0112	3.39444e-07	5.81157e-06
qs_c15901	origin recognition complex subunit 6-like	750	7.29919e-75	0.8595	P:DNA metabolic process; P:biosynthetic process; F:protein binding; F:DNA binding; C:nucleus	-	0	11	-3.82543	5.68398	26.0112	3.39444e-07	5.81157e-06
qs_c8223	pentatricopeptide repeat-containing protein at1g11290-like	765	4.68349e-151	0.86	F:nuclease activity; F:DNA binding; C:plastid; P:nucleobase-containing compound metabolic process; P:response to stress; P:DNA metabolic process	-	0	10	-3.82543	5.68398	26.0112	3.39444e-07	5.81157e-06
qs_c15902	PREDICTED: uncharacterized protein LOC101308409	490	1.08949e-57	0.8045	F:nucleotide binding; P:cellular protein modification process; F:kinase activity	EC:2.7.11.0	0	8	-3.81669	6.55845	45.0774	1.894e-11	7.66695e-10
qs_c20495	dnaj heat shock n-terminal domain-containing protein	489	1.64407e-13	0.775	F:protein binding	-	0	6	-3.81669	6.55845	45.0774	1.894e-11	7.66695e-10
qs_c20555	myosin 2	467	2.56508e-42	0.8295	P:transport; P:cellular process; C:membrane; C:mitochondrion; F:hydrolase activity; F:transporter activity; C:cytoskeleton; P:nucleobase-containing compound metabolic process; P:catabolic process; P:cellular homeostasis; F:nucleotide binding; F:motor activity; P:biological_process; C:plasma membrane	-	0	6	-3.81669	6.55845	45.0774	1.894e-11	7.66695e-10
qs_c23356	probable pectinesterase 68-like	492	2.06787e-24	0.8695	F:hydrolase activity; P:cellular component organization; P:cellular process; C:membrane; C:cell wall	EC:3.1.1.11	0	6	-3.81669	6.55845	45.0774	1.894e-11	7.66695e-10
qs_rep_c37234	signal recognition particle 54 kda protein 2-like	419	7.26301e-45	0.9685	C:cytosol; C:cytoplasm; F:hydrolase activity; F:RNA binding; P:regulation of gene expression, epigenetic; P:nucleobase-containing compound metabolic process; P:transport; P:cellular component organization; P:cellular process; P:response to stress; P:response to biotic stimulus; F:nucleotide binding	EC:3.6.1.15	0	11	-3.8121	7.49134	74.5174	6.01056e-18	6.49273e-16
qs_c18896	nucleolar complex protein 3 homolog	464	5.42593e-51	0.816	P:transport; P:cellular process; P:biosynthetic process; P:nucleobase-containing compound metabolic process	-	0	6	-3.76618	6.51406	43.3156	4.65857e-11	1.77899e-09
qs_c31316	poor homologous synapsis 1	426	4.936e-45	0.698	F:hydrolase activity; P:biosynthetic process; P:cellular process; F:transferase activity; F:protein binding; F:binding; P:nucleobase-containing compound metabolic process; P:response to stress; P:response to abiotic stimulus; P:carbohydrate metabolic process; P:cellular component organization; F:nucleotide binding; P:metabolic process; P:response to biotic stimulus; C:cytosol; C:plastid; P:signal…	EC:3.1.3.48; EC:3.5.4.26; EC:1.1.1.193; EC:2.4.1.1	0	6	-3.76618	6.51406	43.3156	4.65857e-11	1.77899e-09
qs_c58139	pentatricopeptide repeat-containing protein at1g79540-like	307	3.16385e-34	0.7325	P:biological_process		0	6	-3.76618	6.51406	43.3156	4.65857e-11	1.77899e-09
qs_c58210	hnh endonuclease	425	1.3695e-42	0.737	F:nuclease activity; F:nucleic acid binding	-	0	6	-3.76618	6.51406	43.3156	4.65857e-11	1.77899e-09
qs_c58523	cellulose synthase a catalytic subunit 6	188	5.397e-15	0.9685	P:cellular process; P:cell growth; F:binding; C:membrane; P:biosynthetic process; P:carbohydrate metabolic process; P:cellular component organization; F:transferase activity; P:reproduction; P:post-embryonic development; C:Golgi apparatus	EC:2.4.1.12	0	6	-3.76618	6.51406	43.3156	4.65857e-11	1.77899e-09
qs_c58711	heat shock cognate 70 kda protein	439	2.25716e-17	0.8885	F:nucleotide binding; P:response to stress	-	0	6	-3.76618	6.51406	43.3156	4.65857e-11	1.77899e-09
qs_c67650	conserved oligomeric golgi complex subunit 5-like	432	6.18917e-29	0.625	C:cytosol	-	0	6	-3.76618	6.51406	43.3156	4.65857e-11	1.77899e-09
qs_rep_c51957	calmodulin	531	7.23008e-75	0.998	C:cytosol; P:metabolic process; F:binding; P:response to abiotic stimulus; P:post-embryonic development; P:cellular process; P:biological_process; F:protein binding; F:catalytic activity; P:pollination; C:vacuole; P:signal transduction; C:nucleus; C:plasma membrane; P:response to external stimulus	EC:1.3.1.74	0	10	-3.73886	7.24198	64.3687	1.03182e-15	8.44107e-14
qs_c14003	---NA---	345			-		0	10	-3.72632	5.60152	23.9476	9.89933e-07	1.46077e-05
qs_c17009	uncharacterized aarf domain-containing protein kinase chloroplastic-like	618	5.70634e-21	0.9235	P:cellular process; P:catabolic process; P:carbohydrate metabolic process; P:biosynthetic process; P:metabolic process; F:kinase activity; C:plastid; P:biological_process	-	0	7	-3.72632	5.60152	23.9476	9.89933e-07	1.46077e-05
qs_c17026	neutral invertase	573	7.71893e-32	0.719	F:hydrolase activity; C:membrane; P:metabolic process; C:intracellular	EC:3.2.1.26	0	7	-3.72632	5.60152	23.9476	9.89933e-07	1.46077e-05
qs_c17136	thromboxane-a synthase-like	592	2.32869e-93	0.8625	F:binding; F:molecular_function; F:catalytic activity; P:metabolic process	EC:1.14.14.1	0	7	-3.72632	5.60152	23.9476	9.89933e-07	1.46077e-05
qs_c17298	mitochondrial substrate carrier family protein e	638	7.75815e-47	0.833	C:membrane; C:mitochondrion; P:transport; P:cellular process	-	0	7	-3.72632	5.60152	23.9476	9.89933e-07	1.46077e-05
qs_c22295	ankyrin repeat domain-containing protein	713	2.7444e-09	0.5713	-		0	10	-3.72632	5.60152	23.9476	9.89933e-07	1.46077e-05
qs_c22649	casp-like protein vit_17s0000g00560-like	414	1.36483e-28	0.66	C:membrane	-	0	10	-3.72632	5.60152	23.9476	9.89933e-07	1.46077e-05
qs_c24083	protein	568	5.0985e-32	0.6395	F:transferase activity	-	0	7	-3.72632	5.60152	23.9476	9.89933e-07	1.46077e-05
qs_c25593	myb transcription factor	659	1.17203e-51	0.67	P:response to endogenous stimulus; P:response to stress; P:response to abiotic stimulus; ; P:biological_process; C:cytoplasm; C:nucleus	-	0	7	-3.72632	5.60152	23.9476	9.89933e-07	1.46077e-05
qs_c25730	unnamed protein product	606	1.06463e-90	0.771	-		0	7	-3.72632	5.60152	23.9476	9.89933e-07	1.46077e-05
qs_c28426	lrr receptor-like serine threonine-protein kinase	458	1.08816e-85	0.9195	C:plasma membrane; F:kinase activity; P:cellular protein modification process; F:nucleotide binding; P:signal transduction	EC:2.7.10.0; EC:2.7.11.0	0	7	-3.72632	5.60152	23.9476	9.89933e-07	1.46077e-05
qs_c29057	heavy-metal-associated domain-containing protein	671	1.94893e-23	0.7033	P:catabolic process; P:cellular process; P:secondary metabolic process; F:binding; P:biological_process	-	0	10	-3.72632	5.60152	23.9476	9.89933e-07	1.46077e-05
qs_c29167	kinesin-like protein	558	4.98588e-39	0.754	-		0	7	-3.72632	5.60152	23.9476	9.89933e-07	1.46077e-05
qs_c57694	pachytene checkpoint protein 2 homolog	658	4.25061e-100	0.932	F:hydrolase activity; F:nucleotide binding; F:receptor activity; C:plastid	EC:3.6.4.3	0	7	-3.72632	5.60152	23.9476	9.89933e-07	1.46077e-05
qs_c7412	repressor of rna polymerase iii transcription maf1 homolog	990	7.62218e-131	0.8595	; C:nucleus	-	1	25	-3.72632	5.60152	23.9476	9.89933e-07	1.46077e-05
qs_rep_c45011	phospholipase c 3-like	493	2.56571e-33	0.826	F:hydrolase activity	EC:3.1.4.3	0	10	-3.72362	7.2283	63.635	1.49746e-15	1.20487e-13
qs_c12764	g-type lectin s-receptor-like serine threonine-protein kinase at4g27290-like	405	2.44189e-18	0.6665	F:ATP binding; F:protein kinase activity; P:protein phosphorylation; F:transferase activity, transferring phosphorus-containing groups; P:recognition of pollen; F:protein serine/threonine kinase activity		0	6	-3.71383	6.46825	41.5428	1.15318e-10	4.03345e-09
qs_c16981	pectin methylesterase	119	0.00120082	0.805	P:cellular component organization; P:cellular process; C:cell wall; F:hydrolase activity; C:extracellular region; F:enzyme regulator activity; P:biological_process; P:carbohydrate metabolic process; P:catabolic process	EC:3.1.1.11	0	6	-3.71383	6.46825	41.5428	1.15318e-10	4.03345e-09
qs_c23266	pentatricopeptide repeat-containing protein	387	8.32905e-30	0.6225	C:mitochondrion		0	6	-3.71383	6.46825	41.5428	1.15318e-10	4.03345e-09
qs_c26872	protein nynrin-like	387	6.43344e-13	0.775	F:nuclease activity; F:transferase activity; P:biosynthetic process; P:DNA metabolic process; F:RNA binding	EC:3.1.26.4; EC:2.7.7.49	0	6	-3.71383	6.46825	41.5428	1.15318e-10	4.03345e-09
qs_c29316	pentatricopeptide repeat-containing protein at5g65560-like	437	4.79782e-05	0.775	-		0	6	-3.71383	6.46825	41.5428	1.15318e-10	4.03345e-09
qs_c8692	disease resistance protein	580	2.49327e-69	0.581	P:response to stress; F:nucleotide binding	-	0	11	-3.71383	6.46825	41.5428	1.15318e-10	4.03345e-09
qs_c17988	pentatricopeptide repeat-containing protein mitochondrial-like	536	4.56842e-61	0.7295	C:mitochondrion	-	2	15	-3.68664	7.94032	88.5565	4.94033e-21	7.43025e-19
qs_rep_c43832	eukaryotic translation initiation factor 5-like	925	2.56499e-85	0.937	C:cytoplasm; P:translation; F:nucleotide binding; F:translation factor activity, nucleic acid binding; P:nucleobase-containing compound metabolic process; C:nucleus	-	0	21	-3.68257	6.06865	32.1938	1.39538e-08	3.27521e-07
qs_c122696	predicted protein	621	4.11447e-38	0.771	C:membrane	-	1	15	-3.673	6.97349	54.7649	1.35843e-13	7.92838e-12
qs_c15134	peroxisome biogenesis protein 2-like	661	1.04364e-75	0.9	C:cytosol; F:binding; C:peroxisome; P:transport; P:cellular component organization; P:cellular process; C:plasma membrane; P:response to abiotic stimulus; P:post-embryonic development; P:catabolic process; P:lipid metabolic process; C:endoplasmic reticulum	-	1	15	-3.673	6.97349	54.7649	1.35843e-13	7.92838e-12
qs_c19878	adenylate kinase family protein	556	1.1839e-63	0.787	P:nucleobase-containing compound metabolic process; F:kinase activity; ; C:plastid; F:nucleotide binding; C:membrane; C:thylakoid; P:photosynthesis	EC:2.7.4.3	1	15	-3.673	6.97349	54.7649	1.35843e-13	7.92838e-12
qs_c8022	beta glucosidase 17	326	1.5677e-06	0.4965	F:hydrolase activity, hydrolyzing O-glycosyl compounds; P:carbohydrate metabolic process; F:cation binding; F:catalytic activity; F:hydrolase activity; C:plant-type cell wall; P:metabolic process; C:cell wall; P:pollen tube growth; F:hydrolase activity, acting on glycosyl bonds		0	8	-3.673	6.97349	54.7649	1.35843e-13	7.92838e-12
qs_c84729	probable inorganic phosphate transporter 1-9-like	233	4.17403e-08	0.7043	P:nucleobase-containing compound metabolic process; P:catabolic process; F:hydrolase activity; F:transporter activity; C:plasma membrane	EC:3.6.3.27	0	8	-3.673	6.97349	54.7649	1.35843e-13	7.92838e-12
qs_rep_c50093	regulator of ribonuclease-like protein 2-like	278	1.1441e-20	0.967	P:nucleobase-containing compound metabolic process; P:metabolic process; P:cellular process; F:enzyme regulator activity; F:transferase activity	EC:2.1.1.0	0	11	-3.65723	7.51406	72.0293	2.12021e-17	2.07272e-15
qs_rep_c45112	gpcr-type g protein 1	423	2.8876e-25	0.9545	C:cell; F:nucleotide binding; C:plasma membrane; P:response to endogenous stimulus; F:protein binding; P:reproduction; P:post-embryonic development; F:lipid binding	-	0	10	-3.65182	7.34695	66.1953	4.08386e-16	3.42694e-14
qs_c7785	btb poz domain-containing protein at3g05675-like	242	9.49011e-13	0.7011	C:nucleus		0	8	-3.63559	6.94032	53.1879	3.03122e-13	1.6885e-11
qs_c11371	spermatogenesis-associated protein 20-like	575	3.4598e-91	0.93	P:metabolic process; F:catalytic activity; C:plastid	-	0	7	-3.6199	5.51406	21.8754	2.9094e-06	3.7772e-05
qs_c11883	udp-glucose pyrophosphorylase 3	631	7.47716e-81	0.916	P:biosynthetic process; P:cellular process; P:lipid metabolic process; P:response to extracellular stimulus; P:cell communication; P:response to stress; F:transferase activity	EC:2.7.7.0	0	7	-3.6199	5.51406	21.8754	2.9094e-06	3.7772e-05
qs_c14586	nac domain ipr003441	849	3.95856e-32	0.753	P:biosynthetic process; ; ; P:response to stress; P:response to biotic stimulus; P:post-embryonic development; F:DNA binding; F:sequence-specific DNA binding transcription factor activity; P:nucleobase-containing compound metabolic process	-	0	14	-3.6199	5.51406	21.8754	2.9094e-06	3.7772e-05
qs_c14946	somatic embryogenesis receptor kinase	892	1.09172e-42	0.6605	F:kinase activity	-	0	14	-3.6199	5.51406	21.8754	2.9094e-06	3.7772e-05
qs_c20673	uncharacterized f-box lrr-repeat	805	1.28537e-97	0.762	F:molecular_function; P:biological_process		0	14	-3.6199	5.51406	21.8754	2.9094e-06	3.7772e-05
qs_c21433	---NA---	278			-		0	9	-3.6199	5.51406	21.8754	2.9094e-06	3.7772e-05
qs_c32346	aluminum-activated malate transporter 4-like	676	1.18613e-33	0.6845	P:malate transport		0	9	-3.6199	5.51406	21.8754	2.9094e-06	3.7772e-05
qs_rep_c52183	protein	386	2.4137e-40	0.958	F:protein binding; P:multicellular organismal development; P:cellular protein modification process; P:protein metabolic process; P:catabolic process; P:cellular process; F:catalytic activity; C:nucleus; F:binding	EC:6.3.2.19	0	12	-3.60413	7.61209	74.2759	6.7927e-18	7.21798e-16
qs_c14434	gaba transporter 1-like	700	3.40455e-77	0.702	C:membrane	-	1	18	-3.60306	6.37204	37.9654	7.20097e-10	2.1999e-08
qs_c21016	dnaj homolog subfamily c member 13-like	726	8.44188e-116	0.88	F:protein binding; P:response to abiotic stimulus; P:tropism; P:response to extracellular stimulus; P:response to stress; P:transport; P:cellular process; P:protein metabolic process; P:cellular component organization; C:membrane; C:vacuole; C:endosome; C:cell; C:Golgi apparatus; C:endoplasmic reticulum; C:plasma membrane; P:reproduction; P:post-embryonic development; P:embryo development	-	1	18	-3.60306	6.37204	37.9654	7.20097e-10	2.1999e-08
qs_c31891	probable pectinesterase 29-like	535	3.84187e-54	0.656	F:hydrolase activity	-	0	7	-3.60306	6.37204	37.9654	7.20097e-10	2.1999e-08
qs_c67777	uncharacterized loc101207350	454	9.16435e-58	0.629	C:cell wall; C:membrane	-	0	5	-3.60306	6.37204	37.9654	7.20097e-10	2.1999e-08
qs_c68299	---NA---	454			-		0	5	-3.60306	6.37204	37.9654	7.20097e-10	2.1999e-08
qs_c8178	s-receptor kinase kik1 precursor	493	1.8799e-32	0.78	C:cytoplasm; P:cellular protein modification process; F:nucleotide binding; F:kinase activity	EC:2.7.11.0	0	8	-3.59955	6.66381	45.0493	1.9214e-11	7.72988e-10
qs_rep_c36814	probable calcium-binding protein cml25-like	602	2.91523e-45	0.8655	C:cytoplasm; P:anatomical structure morphogenesis; P:cell differentiation; P:multicellular organismal development; P:cell growth; P:response to stress; P:response to abiotic stimulus; P:pollination; F:binding; F:catalytic activity; C:nucleus; P:reproduction; P:cellular process; P:metabolic process	EC:1.3.1.74	0	12	-3.59955	6.66381	45.0493	1.9214e-11	7.72988e-10
qs_rep_c51373	protein trigalactosyldiacylglycerol chloroplastic-like	626	3.53405e-99	0.954	P:nucleobase-containing compound metabolic process; P:catabolic process; P:transport; F:nucleotide binding; F:hydrolase activity; F:transporter activity; C:plastid	EC:3.6.1.3	0	12	-3.59955	6.66381	45.0493	1.9214e-11	7.72988e-10
qs_c22715	40s ribosomal protein s15a-5	647	6.36185e-73	0.923	C:vacuole; F:structural molecule activity; C:ribosome; C:cytosol; P:translation; C:mitochondrion	-	1	14	-3.59718	6.90638	51.6015	6.7991e-13	3.50404e-11
qs_rep_c35611	kinesin-like protein kif2a-like	777	4.27111e-162	0.9705	P:cellular process; C:plasma membrane; F:nucleotide binding; C:nucleus; F:motor activity; C:cytoskeleton	-	1	23	-3.59718	6.90638	51.6015	6.7991e-13	3.50404e-11
qs_rep_c37513	stem-specific protein tsjt1-like	345	7.84612e-27	0.872	C:nucleus; C:cytosol; C:plasma membrane	-	0	9	-3.59418	7.29542	63.3567	1.72466e-15	1.38199e-13
qs_rep_c49721	histone deacetylase	461	1.31134e-36	0.804	P:cellular component organization; P:cellular process; P:anatomical structure morphogenesis; P:multicellular organismal development; F:binding; F:nucleic acid binding; P:response to stress; P:response to abiotic stimulus; C:nucleolus; P:biological_process; ; P:response to endogenous stimulus; F:hydrolase activity	-	0	9	-3.59317	7.45657	68.6584	1.17086e-16	1.0312e-14
qs_rep_c50098	aldehyde dehydrogenase	471	1.19641e-22	0.9365	P:metabolic process; F:catalytic activity	EC:1.2.1.3	0	9	-3.59317	7.45657	68.6584	1.17086e-16	1.0312e-14
qs_c8040	protein	502	2.02392e-80	0.873	F:nucleotide binding; P:cellular protein modification process; P:signal transduction; F:kinase activity; F:signal transducer activity; P:pollen-pistil interaction	EC:2.7.11.25	0	8	-3.57614	6.64334	44.2038	2.95899e-11	1.17351e-09
qs_rep_c54881	proteinase inhibitor serpin emp24 gp25l p24	473	4.69925e-73	0.845	P:transport; P:biosynthetic process; P:cellular protein modification process; P:carbohydrate metabolic process; C:membrane	-	0	10	-3.56854	7.58015	72.3312	1.81944e-17	1.79665e-15
qs_rep_c126562	wd repeat-containing	283	6.38384e-24	0.966	C:cytosol; P:signal transduction; P:response to endogenous stimulus; P:reproduction; P:anatomical structure morphogenesis; P:post-embryonic development; P:embryo development; P:multicellular organismal development; F:protein binding; C:nucleus	-	0	9	-3.56447	7.26895	61.9253	3.56739e-15	2.6622e-13
qs_rep_c39420	translation initiation factor eif3 subunit	479	8.62325e-06	0.7457	C:plasma membrane; C:membrane; C:cytosol	-	0	8	-3.56447	7.26895	61.9253	3.56739e-15	2.6622e-13
qs_c12741	predicted protein	929	5.42521e-43	0.7395	F:molecular_function; P:biological_process; C:cellular_component		0	13	-3.56359	5.46825	20.8367	5.00144e-06	6.0625e-05
qs_c15862	peroxidase 19-like	914	2.12414e-125	0.7965	P:response to stress; F:binding; F:catalytic activity; P:metabolic process	EC:1.11.1.7	0	13	-3.56359	5.46825	20.8367	5.00144e-06	6.0625e-05
qs_c18206	pentatricopeptide repeat-containing protein	893	4.85471e-96	0.7545	P:biological_process		0	13	-3.56359	5.46825	20.8367	5.00144e-06	6.0625e-05
qs_c18397	glyceraldehyde-3-phosphate dehydrogenase a	819	1.18479e-136	0.9595	P:anatomical structure morphogenesis; P:post-embryonic development; C:plastid; C:extracellular region; P:biological_process; F:nucleotide binding; P:cellular protein modification process; P:cellular component organization; P:generation of precursor metabolites and energy; P:photosynthesis; C:cytosol; P:carbohydrate metabolic process; P:catabolic process; P:biosynthetic process; P:response to abio…	EC:1.2.1.13	0	13	-3.56359	5.46825	20.8367	5.00144e-06	6.0625e-05
qs_c39391	class i chitinase	641	2.70963e-09	0.7435	P:biological_process; P:biosynthetic process; P:carbohydrate metabolic process; P:response to external stimulus; P:response to stress; C:extracellular region; ; P:secondary metabolic process; P:transport; P:cell growth; F:hydrolase activity; F:carbohydrate binding; P:multicellular organismal development; P:growth; P:response to abiotic stimulus; P:response to biotic stimulus; P:anatomical structu…	EC:3.2.1.14	0	6	-3.56359	5.46825	20.8367	5.00144e-06	6.0625e-05
qs_c57680	heat shock 70 kda	635	6.49029e-96	0.954	C:plasma membrane; C:cell wall; F:nucleotide binding; F:catalytic activity; C:plastid; P:response to stress; P:response to abiotic stimulus; P:metabolic process	EC:1.3.1.74	0	6	-3.56359	5.46825	20.8367	5.00144e-06	6.0625e-05
qs_c57869	fkbp12-interacting protein of 37 kda-like	652	1.18862e-90	0.9235	-		0	6	-3.56359	5.46825	20.8367	5.00144e-06	6.0625e-05
qs_c57921	glucan endo- -beta-glucosidase 11-like	659	1.61926e-80	0.8525	P:carbohydrate metabolic process; P:multicellular organismal development; F:hydrolase activity; P:metabolic process; P:cellular process; F:binding	EC:3.2.1.39	0	6	-3.56359	5.46825	20.8367	5.00144e-06	6.0625e-05
qs_c59180	atp binding	462	8.37101e-50	0.7185	P:metabolic process; P:cellular process; F:kinase activity; F:nucleotide binding	-	0	6	-3.56359	5.46825	20.8367	5.00144e-06	6.0625e-05
qs_c59197	dna binding	597	1.01859e-39	0.629	F:nucleic acid binding	-	0	6	-3.56359	5.46825	20.8367	5.00144e-06	6.0625e-05
qs_c60094	protein tesmin tso1-like cxc 2-like	594	3.13283e-13	0.5033	-		0	6	-3.56359	5.46825	20.8367	5.00144e-06	6.0625e-05
qs_c60917	stachyose synthase	603	5.17647e-101	0.835	C:cytoplasm; F:transferase activity; P:biosynthetic process; P:carbohydrate metabolic process	EC:2.4.1.67	0	6	-3.56359	5.46825	20.8367	5.00144e-06	6.0625e-05
qs_rep_c49371	predicted protein	521	8.775e-94	0.7955	F:molecular_function; P:biological_process		0	9	-3.56157	7.08391	56.1771	6.62293e-14	4.12393e-12
qs_rep_c55164	stem-specific protein tsjt1-like	497	9.04868e-79	0.9435	-		0	9	-3.56157	7.08391	56.1771	6.62293e-14	4.12393e-12
qs_rep_c55236	atp binding	499	9.48038e-24	0.688	F:kinase activity; P:response to endogenous stimulus; F:nucleotide binding; P:metabolic process; P:cellular process; P:anatomical structure morphogenesis; P:cellular component organization; P:cell growth	-	0	9	-3.56157	7.08391	56.1771	6.62293e-14	4.12393e-12
qs_rep_c37777	chaperone protein dnaj-like protein	462	5.12384e-11	0.8321	F:protein binding	-	0	8	-3.54938	7.25553	61.2065	5.13906e-15	3.76325e-13
qs_c14422	mediator of rna polymerase ii transcription subunit 6-like	714	1.19921e-89	0.8	C:nucleoplasm;	-	1	17	-3.54432	6.32141	36.1616	1.81619e-09	5.151e-08
qs_c16732	---NA---	262			-		1	17	-3.54432	6.32141	36.1616	1.81619e-09	5.151e-08
qs_c19384	ring u-box domain-containing protein	514	4.43617e-54	0.7785	F:binding	-	0	7	-3.54432	6.32141	36.1616	1.81619e-09	5.151e-08
qs_c23306	upf0496 protein at3g49070-like	525	5.64194e-46	0.65	C:integral to membrane; C:membrane; C:chloroplast		0	7	-3.54432	6.32141	36.1616	1.81619e-09	5.151e-08
qs_c23349	66 kda stress	495	7.39732e-30	0.721	C:cytosol; P:anatomical structure morphogenesis; P:cell differentiation; P:cell growth; P:multicellular organismal development; P:biological_process; P:response to stress; P:response to abiotic stimulus; P:carbohydrate metabolic process; C:intracellular; P:transport; P:cellular component organization; P:cellular process; F:nucleotide binding	-	0	7	-3.54432	6.32141	36.1616	1.81619e-09	5.151e-08
qs_c25871	hypothetical protein	511	5.43851e-23	0.6822	F:molecular_function; P:biological_process; C:cellular_component		0	7	-3.54432	6.32141	36.1616	1.81619e-09	5.151e-08
qs_c60264	cohesin loading factor subunit scc2	476	4.93025e-45	0.8295	P:cellular protein modification process; P:cell differentiation; P:metabolic process; F:binding; P:reproduction; P:post-embryonic development; P:cellular component organization; P:cellular process; C:mitochondrion; P:cell cycle; P:embryo development; F:catalytic activity; P:anatomical structure morphogenesis; P:DNA metabolic process; P:catabolic process; P:biosynthetic process	EC:1.11.1.7	0	5	-3.54432	6.32141	36.1616	1.81619e-09	5.151e-08
qs_c60324	pentatricopeptide repeat-containing protein chloroplastic-like	474	6.89171e-82	0.836	P:biosynthetic process; P:cellular process; F:catalytic activity	EC:4.1.1.0	0	5	-3.54432	6.32141	36.1616	1.81619e-09	5.151e-08
qs_c61163	pumilio homolog 4-like	483	1.45465e-39	0.924	F:RNA binding; C:plasma membrane	-	0	5	-3.54432	6.32141	36.1616	1.81619e-09	5.151e-08
qs_c61309	poly polymerase	495	3.99943e-64	0.6905	C:cytoplasm; P:nucleobase-containing compound metabolic process; ; F:RNA binding; F:protein binding; F:transferase activity; C:nucleus	EC:2.7.7.19	0	5	-3.54432	6.32141	36.1616	1.81619e-09	5.151e-08
qs_c62215	retrovirus-related pol polyprotein line-1	377	0.00628693	0.7025	-		0	5	-3.54432	6.32141	36.1616	1.81619e-09	5.151e-08
qs_c62264	kinesin heavy	484	4.3833e-14	0.975	P:cellular process; F:nucleotide binding; F:binding; F:motor activity; C:cytoskeleton	-	0	5	-3.54432	6.32141	36.1616	1.81619e-09	5.151e-08
qs_c63128	f-box family protein	488	4.4193e-15	0.6367	-		0	5	-3.54432	6.32141	36.1616	1.81619e-09	5.151e-08
qs_rep_c37501	ribosomal l18p l5e family protein	448	3.47474e-13	0.7581	F:molecular_function; P:biological_process; C:cellular_component		0	8	-3.51873	7.2283	59.763	1.06997e-14	7.44489e-13
qs_c14877	gram domain-containing protein 1a-like	662	2.2121e-43	0.6615	-		1	14	-3.51715	6.83599	48.4008	3.47421e-12	1.56156e-10
qs_c8206	u3 small nucleolar rna-interacting protein 2- partial	424	4.66873e-06	0.67	-		0	7	-3.51715	6.83599	48.4008	3.47421e-12	1.56156e-10
qs_rep_c45127	protein	527	1.38732e-17	0.6395	P:response to stress; F:kinase activity; P:cellular protein modification process; P:biological_process; F:catalytic activity; F:nucleotide binding; P:metabolic process; P:cellular process; C:cell; C:membrane	-	0	9	-3.50918	7.03762	53.8973	2.11248e-13	1.2148e-11
qs_c23524	pyruvate kinase	554	9.14637e-90	0.6425	F:binding; P:carbohydrate metabolic process; P:generation of precursor metabolites and energy; P:catabolic process; P:metabolic process; P:cellular process; F:kinase activity	EC:2.7.1.40	0	6	-3.50499	5.42095	19.7968	8.61259e-06	9.82459e-05
qs_c23833	hypothetical protein PRUPE_ppa022571mg	564	4.99649e-11	0.56	-		0	6	-3.50499	5.42095	19.7968	8.61259e-06	9.82459e-05
qs_c24369	hypothetical protein PRUPE_ppa027081mg	556	1.105e-05	0.7667	-		0	6	-3.50499	5.42095	19.7968	8.61259e-06	9.82459e-05
qs_c24422	uncharacterized loc101220191	605	2.52643e-52	0.8535	C:mitochondrion	-	0	6	-3.50499	5.42095	19.7968	8.61259e-06	9.82459e-05
qs_c24446	uncharacterized loc101216824 isoform 1	644	9.30577e-43	0.7733	F:molecular_function; P:biological_process		0	6	-3.50499	5.42095	19.7968	8.61259e-06	9.82459e-05
qs_c24481	pentatricopeptide repeat-containing protein at5g66520-like	551	5.38956e-100	0.831	C:plastid	-	0	6	-3.50499	5.42095	19.7968	8.61259e-06	9.82459e-05
qs_c25543	telomere repeat-binding protein 5-like	623	6.27643e-13	0.5967	F:DNA binding		0	6	-3.50499	5.42095	19.7968	8.61259e-06	9.82459e-05
qs_c25548	alpha-glucosidase -like	621	6.25295e-123	0.846	P:carbohydrate metabolic process; F:hydrolase activity; F:carbohydrate binding; C:plastid	EC:3.2.1.20	0	6	-3.50499	5.42095	19.7968	8.61259e-06	9.82459e-05
qs_c25591	pb1 domain containing protein	644	2.72028e-21	0.585	C:vacuole; F:protein binding; P:cellular component organization; P:cellular process	-	0	6	-3.50499	5.42095	19.7968	8.61259e-06	9.82459e-05
qs_c25823	phytochromobilin:ferredoxin chloroplastic-like	570	2.51332e-41	0.7765	F:binding; P:signal transduction; F:catalytic activity; P:biosynthetic process; P:cellular process; C:plastid; P:metabolic process	EC:1.3.7.4	0	6	-3.50499	5.42095	19.7968	8.61259e-06	9.82459e-05
qs_c25903	wd40 yvtn repeat-like-containing domain	575	3.35697e-71	0.806	C:intracellular; F:nucleotide binding; P:response to abiotic stimulus; P:tropism	-	0	6	-3.50499	5.42095	19.7968	8.61259e-06	9.82459e-05
qs_c25932	---NA---	543			-		0	6	-3.50499	5.42095	19.7968	8.61259e-06	9.82459e-05
qs_c26926	uncharacterized loc101211901	593	4.67079e-34	0.65	F:molecular_function; P:biological_process		0	6	-3.50499	5.42095	19.7968	8.61259e-06	9.82459e-05
qs_c27114	uncharacterized loc101218481	633	6.66058e-42	0.7095	F:molecular_function; P:biological_process; C:cellular_component		0	6	-3.50499	5.42095	19.7968	8.61259e-06	9.82459e-05
qs_c27353	upf0481 protein at3g47200-like	657	2.16211e-25	0.5155	P:biological_process; F:molecular_function; C:cellular_component		0	6	-3.50499	5.42095	19.7968	8.61259e-06	9.82459e-05
qs_c28562	tetraspanin family protein	600	5.58782e-79	0.7225	C:membrane	-	0	6	-3.50499	5.42095	19.7968	8.61259e-06	9.82459e-05
qs_c29263	phytochrome-interacting factor	650	9.1419e-27	0.7	P:regulation of transcription, DNA-dependent; F:DNA binding		0	6	-3.50499	5.42095	19.7968	8.61259e-06	9.82459e-05
qs_c29381	exocyst complex component	658	0.00415654	0.78	C:exocyst; P:exocytosis		0	6	-3.50499	5.42095	19.7968	8.61259e-06	9.82459e-05
qs_c29893	nadh dehydrogenase subunit f	567	1.78078e-99	0.9815	F:binding; F:catalytic activity; C:membrane; P:generation of precursor metabolites and energy; C:plastid	EC:1.6.5.3	0	6	-3.50499	5.42095	19.7968	8.61259e-06	9.82459e-05
qs_c5298	cytochrome p450 734a1-like	1390	3.2612e-155	0.805	P:catabolic process; P:cellular process; P:lipid metabolic process; P:secondary metabolic process; P:response to stress; P:generation of precursor metabolites and energy; F:catalytic activity; P:transport; F:molecular_function; C:cytoplasm; F:binding; P:anatomical structure morphogenesis; P:cellular component organization; P:cell growth; P:multicellular organismal development	EC:1.11.1.7	3	32	-3.50499	5.42095	19.7968	8.61259e-06	9.82459e-05
qs_c57432	cysteine-rich repeat secretory protein 3-like	707	1.17028e-53	0.7115	-		0	8	-3.50499	5.42095	19.7968	8.61259e-06	9.82459e-05
qs_c7401	protein	675	1.54796e-49	0.7655	-		0	8	-3.50499	5.42095	19.7968	8.61259e-06	9.82459e-05
qs_c13987	serine threonine-protein kinase endoribonuclease ire-1-like	500	5.95945e-22	0.8885	P:nucleobase-containing compound metabolic process; P:cellular protein modification process; F:nucleotide binding; F:nuclease activity; F:kinase activity	EC:3.1.26.0; EC:2.7.11.0	0	7	-3.48308	6.26895	34.3482	4.60824e-09	1.20294e-07
qs_c15730	gpi transamidase component pig-t-like	513	8.40765e-44	0.688	C:membrane; C:endoplasmic reticulum	-	0	7	-3.48308	6.26895	34.3482	4.60824e-09	1.20294e-07
qs_c16477	dead-like helicase domain-containing protein	510	1.84932e-66	0.9085	P:cell cycle; F:hydrolase activity; F:DNA binding; P:cellular component organization; P:cellular process; F:nucleotide binding; P:response to abiotic stimulus; P:tropism; P:response to stress	-	0	7	-3.48308	6.26895	34.3482	4.60824e-09	1.20294e-07
qs_c22237	protein	718	4.1768e-61	0.883	F:binding; C:intracellular	-	1	16	-3.48308	6.26895	34.3482	4.60824e-09	1.20294e-07
qs_c25698	PREDICTED: uncharacterized protein LOC100258569	482	6.39316e-41	0.7445	-		0	5	-3.48308	6.26895	34.3482	4.60824e-09	1.20294e-07
qs_c25944	pentatricopeptide repeat-containing protein at1g62350-like	471	5.22255e-43	0.918	F:molecular_function; P:biological_process		0	5	-3.48308	6.26895	34.3482	4.60824e-09	1.20294e-07
qs_c26020	protein kinase g11a-like	461	2.80126e-13	0.499	P:cellular process; F:transferase activity; P:cellular component organization	-	0	5	-3.48308	6.26895	34.3482	4.60824e-09	1.20294e-07
qs_c27473	snf1-related protein kinase regulatory subunit gamma-like pv42a-like	466	1.37286e-67	0.8345	P:multicellular organismal development; P:behavior; P:pollination; P:response to external stimulus; F:kinase activity; P:flower development; P:metabolic process; P:cellular process	-	0	5	-3.48308	6.26895	34.3482	4.60824e-09	1.20294e-07
qs_c29146	rho gtpase-activating protein	467	4.14483e-51	0.8825	P:signal transduction; C:cytoplasm; P:cellular component organization; P:cellular process; F:lipid binding; F:enzyme regulator activity; P:pollination; F:protein binding; C:cell; P:anatomical structure morphogenesis; P:cell differentiation; P:cell growth; P:multicellular organismal development; P:pollen-pistil interaction	-	0	5	-3.48308	6.26895	34.3482	4.60824e-09	1.20294e-07
qs_c30763	udp-glucose pyrophosphorylase 3	483	1.46157e-56	0.739	P:biosynthetic process; P:cellular process; P:lipid metabolic process; P:response to extracellular stimulus; P:cell communication; P:response to stress; F:transferase activity	EC:2.7.7.0	0	5	-3.48308	6.26895	34.3482	4.60824e-09	1.20294e-07
qs_c31210	oleosin-like protein	477	2.71953e-66	0.8255	P:reproduction; P:post-embryonic development; C:cytoplasm; C:membrane; P:cellular process; P:anatomical structure morphogenesis; P:multicellular organismal development; P:flower development; P:response to abiotic stimulus; P:cellular protein modification process; P:biological_process; P:response to stress; P:signal transduction; P:embryo development	-	0	5	-3.48308	6.26895	34.3482	4.60824e-09	1.20294e-07
qs_c587	uncharacterized loc101203762	1319	8.54026e-77	0.5358	F:RNA binding; C:cytoplasm; P:mRNA processing; C:nucleus		4	64	-3.48308	6.26895	34.3482	4.60824e-09	1.20294e-07
qs_c59612	translation initiation factor eif-5a	460	6.60719e-26	0.665	P:translation; P:response to external stimulus; P:response to stress; P:cell death; P:carbohydrate metabolic process; P:cellular process; P:catabolic process; P:response to biotic stimulus; F:translation factor activity, nucleic acid binding; P:biological_process; C:nucleus; P:multicellular organismal development	-	0	5	-3.48308	6.26895	34.3482	4.60824e-09	1.20294e-07
qs_c60079	phosphatidylinositol-4-phosphate 5-	449	3.38165e-50	0.8055	P:cellular process; P:anatomical structure morphogenesis; F:kinase activity; F:nucleotide binding; P:pollination; P:cellular component organization; P:cell differentiation; P:cell growth; P:multicellular organismal development; P:lipid metabolic process; P:transport; C:plasma membrane; C:cytosol	EC:2.7.1.68	0	5	-3.48308	6.26895	34.3482	4.60824e-09	1.20294e-07
qs_c60249	kda class i heat shock protein	455	2.57419e-10	0.6065	P:response to stress		0	5	-3.48308	6.26895	34.3482	4.60824e-09	1.20294e-07
qs_c66400	zinc finger family protein	334	1.31728e-21	0.913	F:lipid binding; P:signal transduction; P:catabolic process; P:cellular process; F:binding	-	0	5	-3.48308	6.26895	34.3482	4.60824e-09	1.20294e-07
qs_c67621	protein	378	3.16563e-12	0.7077	F:binding	-	0	5	-3.48308	6.26895	34.3482	4.60824e-09	1.20294e-07
qs_c74661	rna-binding protein	123	2.82303e-15	0.976	P:signal transduction; P:reproduction; P:post-embryonic development; P:embryo development; P:biosynthetic process; P:cellular process; P:lipid metabolic process; P:secondary metabolic process; P:anatomical structure morphogenesis; P:multicellular organismal development; C:peroxisome; P:response to abiotic stimulus; F:catalytic activity; P:response to stress; P:cell death; P:biological_process; P:…	-	0	7	-3.4754	6.79946	46.7869	7.91418e-12	3.41585e-10
qs_rep_c55547	serine threonine-protein kinase atg1-like	480	3.80451e-24	0.5837	F:kinase activity	-	0	9	-3.46911	7.49134	67.0684	2.62252e-16	2.24892e-14
qs_c12164	upf0235 protein c15orf40 homolog	535	2.23607e-54	0.9235	F:molecular_function; P:biological_process		1	11	-3.45583	7.33424	61.7755	3.84935e-15	2.8617e-13
qs_c60277	signal peptidase complex catalytic subunit sec11c-like	343	2.93127e-32	0.945	P:response to stress; P:response to biotic stimulus; F:hydrolase activity; P:cellular process; C:plasma membrane; P:protein metabolic process; C:membrane; C:vacuole; P:catabolic process; C:endoplasmic reticulum	-	0	5	-3.45146	6.24198	33.4382	7.3566e-09	1.84879e-07
qs_c61566	callose synthase 11-like	424	1.92288e-48	0.775	P:transport; P:cellular component organization; P:cellular process; P:response to stress; P:cell death; P:response to biotic stimulus; C:Golgi apparatus; P:signal transduction; P:anatomical structure morphogenesis; P:multicellular organismal development; P:cell cycle; P:biosynthetic process; P:carbohydrate metabolic process; P:biological_process; C:plasma membrane; F:transferase activity	EC:2.4.1.34	0	5	-3.45146	6.24198	33.4382	7.3566e-09	1.84879e-07
qs_c62328	protein binding	229	1.06649e-23	0.804	C:cytoplasm; C:cytosol; C:nucleus; P:transport; P:cellular process	-	0	5	-3.45146	6.24198	33.4382	7.3566e-09	1.84879e-07
qs_c12834	uncharacterized loc101215717	654	2.98862e-15	0.709	-		0	6	-3.44392	5.37204	18.756	1.48553e-05	0.000160914
qs_c16157	ca2+ antiporter cation exchanger	600	1.62852e-72	0.8085	P:transport; P:cellular process; C:membrane	-	0	6	-3.44392	5.37204	18.756	1.48553e-05	0.000160914
qs_c19465	probable pectinesterase pectinesterase inhibitor 40-like	881	2.69966e-116	0.8645	P:cellular component organization; P:cellular process; C:cytoplasm; C:cell wall; F:hydrolase activity; F:enzyme regulator activity; P:biological_process; P:carbohydrate metabolic process; P:catabolic process	EC:3.1.1.11	0	12	-3.44392	5.37204	18.756	1.48553e-05	0.000160914
qs_c20730	chaperone protein dnaj	802	9.3504e-85	0.805	P:protein metabolic process; P:cellular process; F:protein binding; P:response to stress; C:mitochondrion	-	0	12	-3.44392	5.37204	18.756	1.48553e-05	0.000160914
qs_c21535	probable polygalacturonase-like	564	1.02121e-97	0.919	F:hydrolase activity; P:carbohydrate metabolic process; C:extracellular region; C:vacuole; P:cellular component organization; P:cellular process	EC:3.2.1.67; EC:3.2.1.15	0	6	-3.44392	5.37204	18.756	1.48553e-05	0.000160914
qs_c23949	protein	682	1.83306e-39	0.8835	P:carbohydrate metabolic process; P:cellular process; P:catabolic process; P:anatomical structure morphogenesis; P:cell differentiation; P:cell growth; P:multicellular organismal development; C:Golgi apparatus; P:response to stress; P:response to biotic stimulus; P:signal transduction	-	0	8	-3.44392	5.37204	18.756	1.48553e-05	0.000160914
qs_c24036	adenylyl cyclase	698	2.68141e-46	0.6955	C:mitochondrion	-	0	8	-3.44392	5.37204	18.756	1.48553e-05	0.000160914
qs_c25539	protein	701	4.21401e-100	0.632	F:molecular_function; P:biological_process; C:cellular_component		0	8	-3.44392	5.37204	18.756	1.48553e-05	0.000160914
qs_c29622	sucrose phosphate synthase	691	3.62409e-136	0.9225	P:biosynthetic process; P:carbohydrate metabolic process; P:cellular process; C:plasma membrane; F:transferase activity	EC:2.4.1.14	0	8	-3.44392	5.37204	18.756	1.48553e-05	0.000160914
qs_c21754	ap2 erf domain-containing transcription factor	577	3.27943e-64	0.7585	F:sequence-specific DNA binding transcription factor activity; F:DNA binding; C:nucleus;	-	1	13	-3.43241	6.76199	45.164	1.81202e-11	7.41186e-10
qs_c17075	avr9 cf-9 rapidly elicited protein	754	3.46185e-47	0.691	F:molecular_function; P:biological_process		1	16	-3.41913	6.2145	32.526	1.17609e-08	2.78726e-07
qs_c17616	acyltransferase-like protein	392	2.95392e-28	0.7825	P:metabolic process; F:transferase activity; C:plastid	EC:2.3.1.0	0	5	-3.41913	6.2145	32.526	1.17609e-08	2.78726e-07
qs_c20799	dna gyrase subunit chloroplastic mitochondrial-like	374	5.10856e-32	0.9725	F:DNA binding; F:catalytic activity; F:nucleotide binding; C:intracellular; P:DNA metabolic process; C:plastid; C:mitochondrion	EC:5.99.1.3	0	5	-3.41913	6.2145	32.526	1.17609e-08	2.78726e-07
qs_c20805	solute carrier family 40 member 2-like	468	1.23667e-56	0.707	F:transporter activity; P:transport; P:response to extracellular stimulus; P:cell communication; P:response to stress; C:membrane; C:vacuole; P:biological_process; P:cellular process; C:plasma membrane	-	0	5	-3.41913	6.2145	32.526	1.17609e-08	2.78726e-07
qs_c23924	dna primase large subunit	473	2.25178e-41	0.853	P:cell cycle; C:plasma membrane; P:cellular component organization; P:cellular protein modification process; F:transferase activity; P:DNA metabolic process; P:biosynthetic process; P:cellular process; P:regulation of gene expression, epigenetic	-	0	5	-3.41913	6.2145	32.526	1.17609e-08	2.78726e-07
qs_c24106	g-type lectin s-receptor-like serine threonine-protein kinase rlk1-like	489	3.57534e-48	0.679	P:cellular process; F:binding; F:kinase activity	-	0	5	-3.41913	6.2145	32.526	1.17609e-08	2.78726e-07
qs_c24417	wd repeat-containing protein 85 homolog	463	2.4906e-24	0.826	C:intracellular; F:nucleotide binding	-	0	5	-3.41913	6.2145	32.526	1.17609e-08	2.78726e-07
qs_c24538	pentatricopeptide repeat-containing protein	490	2.06542e-40	0.6415	F:molecular_function; P:biological_process; C:cellular_component		0	5	-3.41913	6.2145	32.526	1.17609e-08	2.78726e-07
qs_c24605	hypothetical protein PRUPE_ppa015715mg, partial	455	2.93647e-45	0.726	F:transferase activity; P:DNA metabolic process; P:biosynthetic process; F:RNA binding; C:nucleus; F:binding	EC:2.7.7.49	0	5	-3.41913	6.2145	32.526	1.17609e-08	2.78726e-07
qs_c25510	trna-specific adenosine deaminase-like protein	483	8.70739e-12	0.785	F:hydrolase activity; F:binding; P:metabolic process	-	0	5	-3.41913	6.2145	32.526	1.17609e-08	2.78726e-07
qs_c25579	boron transporter 4-like	484	6.08446e-43	0.867	F:transporter activity; C:membrane; C:mitochondrion	-	0	5	-3.41913	6.2145	32.526	1.17609e-08	2.78726e-07
qs_c26336	rna polymerase subunit	315	0.000243318	0.88	F:transferase activity; ; F:DNA binding; F:binding; C:plastid	EC:2.7.7.6	0	5	-3.41913	6.2145	32.526	1.17609e-08	2.78726e-07
qs_c26901	udp-glucose:flavonoid 3-o-glucosyltransferase	419	6.24345e-32	0.7065	F:transferase activity; P:metabolic process	-	0	5	-3.41913	6.2145	32.526	1.17609e-08	2.78726e-07
qs_c29705	probable transcriptional regulatory protein at2g25830-like	330	2.31495e-07	0.8911	P:biosynthetic process; P:cellular process; ; C:plastid	-	0	5	-3.41913	6.2145	32.526	1.17609e-08	2.78726e-07
qs_c31008	predicted protein	165	0.00302421	0.88	-		0	5	-3.41913	6.2145	32.526	1.17609e-08	2.78726e-07
qs_c31234	light-harvesting complex ii protein lhcb3	416	5.6092e-70	0.98	P:generation of precursor metabolites and energy; P:photosynthesis; C:membrane; C:plastid; C:thylakoid; F:structural molecule activity	-	0	5	-3.41913	6.2145	32.526	1.17609e-08	2.78726e-07
qs_c747	PREDICTED: uncharacterized protein LOC100803801	619	2.81539e-40	0.6147	C:plastid		3	28	-3.39922	8.08391	85.5833	2.22139e-20	3.10233e-18
qs_c105917	uncharacterized mitochondrial protein g00810-like	415	4.25502e-35	0.75	F:binding	-	0	3	-3.38014	5.32141	17.7148	2.56616e-05	0.000257301
qs_c108054	random slug protein 5-like	293	1.17459e-23	0.801	C:intracellular; P:transport; F:transporter activity; P:response to stress	-	0	3	-3.38014	5.32141	17.7148	2.56616e-05	0.000257301
qs_c11187	coatomer subunit beta -2-like	626	6.51105e-106	0.883	P:transport; P:cellular process; C:membrane; C:Golgi apparatus; C:cytosol; P:protein metabolic process; P:catabolic process; P:cellular component organization; F:kinase activity; P:biosynthetic process; P:lipid metabolic process; P:carbohydrate metabolic process; F:structural molecule activity	EC:2.7.11.7	0	6	-3.38014	5.32141	17.7148	2.56616e-05	0.000257301
qs_c11222	lrr receptor-like serine threonine-protein kinase fls2-like	785	7.30415e-70	0.716	P:metabolic process; F:catalytic activity	-	0	8	-3.38014	5.32141	17.7148	2.56616e-05	0.000257301
qs_c11436	cchc-type zinc knuckle protein	715	2.09782e-78	0.654	F:binding	-	0	8	-3.38014	5.32141	17.7148	2.56616e-05	0.000257301
qs_c11525	rna pseudourine synthase chloroplastic-like	721	2.80824e-95	0.8455	F:catalytic activity; F:RNA binding; P:nucleobase-containing compound metabolic process; F:binding; P:cellular protein modification process; F:nucleotide binding; F:kinase activity	EC:5.4.99.12; EC:2.7.11.0	0	8	-3.38014	5.32141	17.7148	2.56616e-05	0.000257301
qs_c11593	methionyl-trna synthetase	353	5.35604e-13	0.839	C:mitochondrion; F:catalytic activity; P:flower development; F:nucleotide binding; C:plastid; P:nucleobase-containing compound metabolic process; P:translation;	EC:6.1.1.10	0	3	-3.38014	5.32141	17.7148	2.56616e-05	0.000257301
qs_c117774	pentatricopeptide repeat-containing protein at5g16860-like	408	9.38334e-54	0.7555	F:molecular_function; P:biological_process; C:cellular_component		0	3	-3.38014	5.32141	17.7148	2.56616e-05	0.000257301
qs_c12071	protein binding protein	652	2.25557e-34	0.959	F:binding; F:catalytic activity	-	0	6	-3.38014	5.32141	17.7148	2.56616e-05	0.000257301
qs_c12137	laccase-14-like	508	7.83161e-30	0.7015	F:metal ion binding; P:lignin catabolic process; P:oxidation-reduction process; F:oxidoreductase activity; C:apoplast; F:copper ion binding; F:hydroquinone:oxygen oxidoreductase activity		0	4	-3.38014	5.32141	17.7148	2.56616e-05	0.000257301
qs_c124032	elongation factor ef-2	592	2.83756e-81	0.9475	C:cytosol; F:translation factor activity, nucleic acid binding; P:translation; P:nucleobase-containing compound metabolic process; P:catabolic process; F:hydrolase activity; F:nucleotide binding	-	0	6	-3.38014	5.32141	17.7148	2.56616e-05	0.000257301
qs_c12666	predicted protein	558	4.6138e-07	0.7567	C:membrane; C:vacuole; C:plasma membrane	-	0	6	-3.38014	5.32141	17.7148	2.56616e-05	0.000257301
qs_c14914	g-box-binding factor 1-like	906	2.17255e-12	0.5367	P:metabolic process; F:binding; P:cellular process	-	0	12	-3.38014	5.32141	17.7148	2.56616e-05	0.000257301
qs_c2826	adenylate isopentenyltransferase	943	2.18047e-31	0.6655	F:transferase activity; P:metabolic process; P:cellular process; P:reproduction; C:plastid; P:biosynthetic process	EC:2.5.1.27	1	20	-3.38014	5.32141	17.7148	2.56616e-05	0.000257301
qs_rep_c51907	mitochondrial phosphate transporter	278	1.28499e-41	0.9615	C:membrane; C:cell wall; C:mitochondrion; F:protein binding; C:plastid; P:transport; C:plasma membrane	-	0	10	-3.37611	7.40888	62.3711	2.84467e-15	2.19838e-13
qs_rep_c44123	protein phosphatase 2c-like protein	264	2.34175e-16	0.893	P:cellular protein modification process; F:binding; F:hydrolase activity	-	1	15	-3.37209	7.09902	53.1678	3.06233e-13	1.69137e-11
qs_rep_c45586	pyruvate cytosolic isozyme-like	478	6.57102e-78	0.91	F:kinase activity; P:biological_process; C:plasma membrane; P:metabolic process; P:cellular process; F:binding; P:carbohydrate metabolic process; P:generation of precursor metabolites and energy; P:catabolic process	EC:2.7.1.40	0	7	-3.37209	7.09902	53.1678	3.06233e-13	1.69137e-11
qs_c12109	atp-dependent rna helicase dhx29-like	464	6.76773e-21	0.8475	F:hydrolase activity; F:nucleic acid binding; F:nucleotide binding; C:plastid	-	0	5	-3.35221	6.15791	30.6956	3.01842e-08	6.66423e-07
qs_c12456	trna (guanosine -2 -o)-methyltransferase-like	465	2.98518e-29	0.904	F:transferase activity; F:RNA binding; P:nucleobase-containing compound metabolic process	EC:2.1.1.34	0	5	-3.35221	6.15791	30.6956	3.01842e-08	6.66423e-07
qs_c12739	thymidine kinase-like	491	9.61714e-40	0.967	P:DNA metabolic process; P:biosynthetic process; F:kinase activity; P:metabolic process; P:cellular process; F:nucleotide binding	EC:2.7.1.21	0	5	-3.35221	6.15791	30.6956	3.01842e-08	6.66423e-07
qs_c17358	folate-biopterin transporter chloroplastic-like	490	1.2637e-23	0.772	P:transport; C:plastid; F:transporter activity; C:membrane	-	0	5	-3.35221	6.15791	30.6956	3.01842e-08	6.66423e-07
qs_c17460	pentatricopeptide repeat-containing	292	1.26572e-26	0.8	-		0	5	-3.35221	6.15791	30.6956	3.01842e-08	6.66423e-07
qs_c20573	homeobox protein knotted-	448	3.10468e-26	0.857	F:sequence-specific DNA binding transcription factor activity; F:DNA binding; C:nucleus;	-	0	5	-3.35221	6.15791	30.6956	3.01842e-08	6.66423e-07
qs_c20652	lipoxygenase choloroplastic-like	472	6.10712e-43	0.6805	P:biosynthetic process; P:cellular process; P:lipid metabolic process; F:binding; F:catalytic activity; C:plastid	EC:1.13.11.0	0	5	-3.35221	6.15791	30.6956	3.01842e-08	6.66423e-07
qs_c20748	receptor-like protein	489	1.8483e-33	0.6975	F:receptor activity		0	5	-3.35221	6.15791	30.6956	3.01842e-08	6.66423e-07
qs_c17974	disease resistance response protein 206-like	647	2.82835e-77	0.7305	-		2	17	-3.35127	7.24198	56.8459	4.71338e-14	2.99208e-12
qs_c9808	protein	511	6.46177e-46	0.6665	F:binding	-	0	8	-3.34239	6.68398	41.8926	9.6428e-11	3.44044e-09
qs_rep_c45500	late embryogenesis abundant protein 3l-1	463	2.97404e-06	0.895	P:response to stress	-	0	7	-3.33738	7.06865	51.6806	6.5306e-13	3.50404e-11
qs_c14591	ap3-complex subunit beta-a-like	607	5.33502e-64	0.752	C:Golgi apparatus; C:membrane; C:cytoplasm; F:transporter activity; P:transport; P:cellular process; P:cellular component organization	-	2	17	-3.3357	7.2283	56.1342	6.76879e-14	4.20138e-12
qs_rep_c45274	proline synthase co-transcribed bacterial homolog	461	2.27476e-50	0.7365	C:plastid	-	0	7	-3.31971	7.05322	50.934	9.55227e-13	4.85106e-11
qs_c62023	aspartic proteinase pcs1-like	507	3.58229e-65	0.8655	P:reproduction; P:post-embryonic development; P:embryo development; F:hydrolase activity; P:cell death; P:protein metabolic process; P:catabolic process; C:endoplasmic reticulum	EC:3.4.23.0	0	6	-3.31755	6.12877	29.7777	4.84535e-08	1.02086e-06
qs_c25745	vacuolar protein sorting-associated protein 26-like	678	1.80988e-116	0.945	P:transport; P:cellular process; P:cell growth; C:membrane; C:endosome; P:biosynthetic process; P:carbohydrate metabolic process; P:anatomical structure morphogenesis; P:cellular component organization; C:cell	-	0	7	-3.31342	5.26895	16.6738	4.43906e-05	0.000421732
qs_c27598	probable cinnamyl alcohol dehydrogenase 6-like	772	1.47752e-99	0.852	F:catalytic activity; F:nucleotide binding; P:metabolic process; F:binding	EC:1.1.1.255	0	7	-3.31342	5.26895	16.6738	4.43906e-05	0.000421732
qs_c31828	protein mei2-like 4-like	904	1.64567e-53	0.6105	F:binding	-	0	11	-3.31342	5.26895	16.6738	4.43906e-05	0.000421732
qs_c4320	pleiotropic drug resistance protein 2-like	1015	1.50769e-148	0.855	F:hydrolase activity; F:transporter activity; P:nucleobase-containing compound metabolic process; P:catabolic process; F:nucleotide binding; C:membrane	EC:3.6.3.28	1	19	-3.31342	5.26895	16.6738	4.43906e-05	0.000421732
qs_c58307	pentatricopeptide repeat-containing protein	766	3.68933e-107	0.839	P:biological_process; C:membrane		0	7	-3.31342	5.26895	16.6738	4.43906e-05	0.000421732
qs_c22841	ribosomal protein l2	640	2.20072e-07	0.9365	C:ribosome; C:mitochondrion; F:structural molecule activity; F:transferase activity; C:plastid; P:translation; F:RNA binding	-	2	16	-3.30403	7.20056	54.7055	1.40017e-13	8.14768e-12
qs_rep_c41492	low quality protein: proteasome-associated protein ecm29 homolog	465	1.79481e-46	0.8015	C:intracellular; C:membrane	-	0	7	-3.30181	7.03762	50.1856	1.3987e-12	6.94098e-11
qs_c7573	leucine-rich repeat receptor protein kinase exs-like	506	1.09234e-46	0.6925	F:hydrolase activity; P:cellular protein modification process; P:signal transduction; F:catalytic activity; C:membrane; P:anatomical structure morphogenesis; P:post-embryonic development; P:cellular process; F:kinase activity; F:signal transducer activity; P:metabolic process; F:receptor activity; F:nucleotide binding; P:reproduction; P:flower development	EC:3.1.3.16; EC:1.3.1.74; EC:2.7.11.25	0	7	-3.28991	6.3967	34.7533	3.74243e-09	1.00373e-07
qs_c8257	cation-chloride co-transporter 1	501	2.0387e-19	0.758	C:membrane; F:transporter activity; P:transport; C:plasma membrane; P:cellular process	-	0	7	-3.28991	6.3967	34.7533	3.74243e-09	1.00373e-07
qs_c23591	auxin-responsive protein iaa26-like	547	6.27953e-37	0.641	P:cellular process	-	0	6	-3.28204	6.09902	28.8581	7.78811e-08	1.59448e-06
qs_c24336	ribonuclease j-like	522	1.35e-48	0.695	C:plastid	-	0	6	-3.28204	6.09902	28.8581	7.78811e-08	1.59448e-06
qs_c24355	reticuline oxidase	501	3.55253e-51	0.7795	F:nucleotide binding; F:catalytic activity; P:metabolic process	EC:1.21.3.3; EC:1.1.1.158	0	6	-3.28204	6.09902	28.8581	7.78811e-08	1.59448e-06
qs_c24361	chloroplast envelope membrane	536	9.92938e-34	0.683	C:integral to membrane; P:biological_process		0	6	-3.28204	6.09902	28.8581	7.78811e-08	1.59448e-06
qs_c25869	pentatricopeptide repeat-containing protein	504	5.38174e-22	0.698	F:molecular_function; P:biological_process; C:cellular_component; F:ATP binding; F:transferase activity; C:integral to membrane; F:ATPase activity, coupled to transmembrane movement of substances; P:transmembrane transport; P:transport		0	6	-3.28204	6.09902	28.8581	7.78811e-08	1.59448e-06
qs_c26037	auxin-responsive protein iaa29	504	4.1193e-22	0.5935	P:cellular process; P:metabolic process	-	0	6	-3.28204	6.09902	28.8581	7.78811e-08	1.59448e-06
qs_c26308	abc transporter g family member 11-like	545	9.9683e-83	0.943	C:plasma membrane; F:hydrolase activity; F:transporter activity; P:response to stress; P:response to abiotic stimulus; P:response to external stimulus; P:nucleobase-containing compound metabolic process; P:catabolic process; P:transport; F:nucleotide binding; P:response to endogenous stimulus	EC:3.6.3.28	0	6	-3.28204	6.09902	28.8581	7.78811e-08	1.59448e-06
qs_c31027	tubulin-specific chaperone d-like	507	1.08512e-75	0.8405	P:transport; P:cell-cell signaling; P:protein metabolic process; P:cellular process; P:reproduction; P:post-embryonic development; P:embryo development; P:cellular component organization; P:cell cycle; C:cytosol; P:cellular protein modification process; P:response to abiotic stimulus; F:protein binding; P:regulation of gene expression, epigenetic; P:nucleobase-containing compound metabolic proces…	-	0	6	-3.28204	6.09902	28.8581	7.78811e-08	1.59448e-06
qs_rep_c55540	atp-citrate synthase beta chain protein 1-like	433	4.27706e-85	0.981	P:biosynthetic process; P:cellular process; P:lipid metabolic process; C:cytosol; P:cellular protein modification process; F:catalytic activity; F:transferase activity; C:cytoplasm; P:reproduction; P:post-embryonic development; P:carbohydrate metabolic process; F:nucleotide binding; F:binding; C:plasma membrane	EC:2.3.3.8; EC:6.2.1.5	0	9	-3.2767	7.32141	57.5882	3.23166e-14	2.12746e-12
qs_c14623	atp-dependent rna helicase mitochondrial-like	617	2.06924e-26	0.8875	P:multicellular organismal development; F:hydrolase activity; F:nucleic acid binding; F:nucleotide binding; P:nucleobase-containing compound metabolic process; C:mitochondrion	-	2	16	-3.27165	7.17227	53.2694	2.90802e-13	1.64805e-11
qs_rep_c37455	polypyrimidine tract binding	472	1.24755e-09	0.6422	P:metabolic process; C:intracellular	-	0	7	-3.26534	7.00591	48.6831	3.00854e-12	1.40055e-10
qs_rep_c38584	cation-transporting atpase	485	7.62518e-14	0.8305	P:response to extracellular stimulus; P:cell communication; P:response to stress; P:cell differentiation; P:transport; P:cellular process; P:biosynthetic process; P:carbohydrate metabolic process; P:cellular component organization; C:membrane; P:pollination; P:multicellular organismal development; F:binding; F:hydrolase activity; F:transporter activity; C:endoplasmic reticulum; P:nucleobase-conta…	EC:3.6.3.8	0	7	-3.26534	7.00591	48.6831	3.00854e-12	1.40055e-10
qs_rep_c39552	abhydrolase domain-containing protein fam108c1-like	447	2.547e-48	0.9345	C:plastid	-	0	7	-3.26534	7.00591	48.6831	3.00854e-12	1.40055e-10
qs_rep_c53134	dopamine beta-	549	4.40499e-52	0.6825	C:membrane	-	0	8	-3.25722	6.81784	43.8005	3.63605e-11	1.41336e-09
qs_c19884	uroporphyrinogen decarboxylase chloroplastic-like	601	5.38427e-74	0.942	P:biosynthetic process; P:cellular process; F:catalytic activity; P:catabolic process; ; C:plastid; P:biological_process	EC:4.1.1.37	1	12	-3.24638	6.60152	38.5886	5.23235e-10	1.67162e-08
qs_c17325	protein kinase-like protein	520	6.04738e-59	0.948	P:cellular protein modification process; F:nucleotide binding; F:kinase activity; P:pollination; P:anatomical structure morphogenesis; P:cellular component organization; P:cell differentiation; P:cell growth; P:multicellular organismal development; P:cellular process	EC:2.7.10.0; EC:2.7.11.13	0	6	-3.24562	6.06865	27.9369	1.25338e-07	2.39785e-06
qs_c17909	probable cadmium zinc-transporting atpase chloroplastic-like	510	5.14363e-77	0.808	P:biological_process; C:plastid; F:transporter activity; P:response to abiotic stimulus; P:transport; F:hydrolase activity; C:membrane; P:cellular homeostasis; F:binding; P:biosynthetic process; P:nucleobase-containing compound metabolic process; F:nucleotide binding	EC:3.6.3.4; EC:3.6.3.46; EC:3.6.3.8; EC:3.6.3.5	0	6	-3.24562	6.06865	27.9369	1.25338e-07	2.39785e-06
qs_c18832	pentatricopeptide repeat-containing protein	495	1.37927e-48	0.748	P:biological_process; F:ATP binding; F:transferase activity; C:integral to membrane; F:ATPase activity, coupled to transmembrane movement of substances; P:transmembrane transport; P:transport		0	6	-3.24562	6.06865	27.9369	1.25338e-07	2.39785e-06
[truncated: 598 more rows]
